# Supplementary material for: Rehabilitation delivery models to foster healthy ageing—a scoping review
Source: PubMed Central journal article supplement (PMC11041397; doi:10.3389/fresc.2024.1307536), 2024-04-05
Supplement: Datasheet1.pdf [file Datasheet1.pdf]

## *Supplementary Material*

### Supplementary Material 1

#### Preferred Reporting Items for Systematic reviews and Meta-Analyses extension for Scoping Reviews (PRISMA-ScR) Checklist

| SECTION                           | ITEM | PRISMA-ScR CHECKLIST ITEM                                                                                                                                                                                                                                                 | REPORTED ON PAGE #                                           |
|-----------------------------------|------|---------------------------------------------------------------------------------------------------------------------------------------------------------------------------------------------------------------------------------------------------------------------------|--------------------------------------------------------------|
| <b>TITLE</b>                      |      |                                                                                                                                                                                                                                                                           |                                                              |
| Title                             | 1    | Identify the report as a scoping review.                                                                                                                                                                                                                                  | 1                                                            |
| <b>ABSTRACT</b>                   |      |                                                                                                                                                                                                                                                                           |                                                              |
| Structured summary                | 2    | Provide a structured summary that includes (as applicable): background, objectives, eligibility criteria, sources of evidence, charting methods, results, and conclusions that relate to the review questions and objectives.                                             | 1                                                            |
| <b>INTRODUCTION</b>               |      |                                                                                                                                                                                                                                                                           |                                                              |
| Rationale                         | 3    | Describe the rationale for the review in the context of what is already known. Explain why the review questions/objectives lend themselves to a scoping review approach.                                                                                                  | 2 to 3                                                       |
| Objectives                        | 4    | Provide an explicit statement of the questions and objectives being addressed with reference to their key elements (e.g., population or participants, concepts, and context) or other relevant key elements used to conceptualize the review questions and/or objectives. | 3                                                            |
| <b>METHODS</b>                    |      |                                                                                                                                                                                                                                                                           |                                                              |
| Protocol and registration         | 5    | Indicate whether a review protocol exists; state if and where it can be accessed (e.g., a Web address); and if available, provide registration information, including the registration number.                                                                            | 3 and Supplementary Material 2                               |
| Eligibility criteria              | 6    | Specify characteristics of the sources of evidence used as eligibility criteria (e.g., years considered, language, and publication status), and provide a rationale.                                                                                                      | 3                                                            |
| Information sources*              | 7    | Describe all information sources in the search (e.g., databases with dates of coverage and contact with authors to identify additional sources), as well as the date the most recent search was executed.                                                                 | 3 and Supplementary Material 3 and PRISMA diagram (Figure 1) |
| Search                            | 8    | Present the full electronic search strategy for at least 1 database, including any limits used, such that it could be repeated.                                                                                                                                           | 3 and Supplementary Material 3                               |
| Selection of sources of evidence† | 9    | State the process for selecting sources of evidence (i.e., screening and eligibility) included in the scoping review.                                                                                                                                                     | 3 to 4                                                       |
| Data charting process‡            | 10   | Describe the methods of charting data from the included sources of evidence (e.g., calibrated forms or forms that have been tested by the team before their use, and whether data charting                                                                                | 4 and Supplementary Material 2                               |

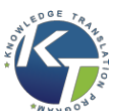

| SECTION                                               | ITEM | PRISMA-ScR CHECKLIST ITEM                                                                                                                                                                             | REPORTED ON PAGE #                          |
|-------------------------------------------------------|------|-------------------------------------------------------------------------------------------------------------------------------------------------------------------------------------------------------|---------------------------------------------|
|                                                       |      | was done independently or in duplicate) and any processes for obtaining and confirming data from investigators.                                                                                       |                                             |
| Data items                                            | 11   | List and define all variables for which data were sought and any assumptions and simplifications made.                                                                                                | 4 and Supplementary Material 2              |
| Critical appraisal of individual sources of evidence§ | 12   | If done, provide a rationale for conducting a critical appraisal of included sources of evidence; describe the methods used and how this information was used in any data synthesis (if appropriate). | 4                                           |
| Synthesis of results                                  | 13   | Describe the methods of handling and summarizing the data that were charted.                                                                                                                          | 4 and Supplementary Material 2              |
| <b>RESULTS</b>                                        |      |                                                                                                                                                                                                       |                                             |
| Selection of sources of evidence                      | 14   | Give numbers of sources of evidence screened, assessed for eligibility, and included in the review, with reasons for exclusions at each stage, ideally using a flow diagram.                          | 4 and PRISMA diagram (Figure 1)             |
| Characteristics of sources of evidence                | 15   | For each source of evidence, present characteristics for which data were charted and provide the citations.                                                                                           | 4, Table 1, and Supplementary Material 4    |
| Critical appraisal within sources of evidence         | 16   | If done, present data on critical appraisal of included sources of evidence (see item 12).                                                                                                            | N/A                                         |
| Results of individual sources of evidence             | 17   | For each included source of evidence, present the relevant data that were charted that relate to the review questions and objectives.                                                                 | 4 to 12 and Supplementary Materials 4 and 5 |
| Synthesis of results                                  | 18   | Summarize and/or present the charting results as they relate to the review questions and objectives.                                                                                                  | Tables 2 to 6                               |
| <b>DISCUSSION</b>                                     |      |                                                                                                                                                                                                       |                                             |
| Summary of evidence                                   | 19   | Summarize the main results (including an overview of concepts, themes, and types of evidence available), link to the review questions and objectives, and consider the relevance to key groups.       | 12 to 13                                    |
| Limitations                                           | 20   | Discuss the limitations of the scoping review process.                                                                                                                                                | 14                                          |
| Conclusions                                           | 21   | Provide a general interpretation of the results with respect to the review questions and objectives, as well as potential implications and/or next steps.                                             | 14                                          |
| <b>FUNDING</b>                                        |      |                                                                                                                                                                                                       |                                             |
| Funding                                               | 22   | Describe sources of funding for the included sources of evidence, as well as sources of funding for the scoping review. Describe the role of the funders of the scoping review.                       | 14                                          |

JB1 = Joanna Briggs Institute; PRISMA-ScR = Preferred Reporting Items for Systematic reviews and Meta-Analyses extension for Scoping Reviews.

\* Where *sources of evidence* (see second footnote) are compiled from, such as bibliographic databases, social media platforms, and Web sites.

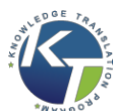

† A more inclusive/heterogeneous term used to account for the different types of evidence or data sources (e.g., quantitative and/or qualitative research, expert opinion, and policy documents) that may be eligible in a scoping review as opposed to only studies. This is not to be confused with *information sources* (see first footnote).

‡ The frameworks by Arksey and O'Malley (6) and Levac and colleagues (7) and the JBI guidance (4, 5) refer to the process of data extraction in a scoping review as data charting.

§ The process of systematically examining research evidence to assess its validity, results, and relevance before using it to inform a decision. This term is used for items 12 and 19 instead of "risk of bias" (which is more applicable to systematic reviews of interventions) to include and acknowledge the various sources of evidence that may be used in a scoping review (e.g., quantitative and/or qualitative research, expert opinion, and policy document).

From: Tricco AC, Lillie E, Zarin W, O'Brien KK, Colquhoun H, Levac D, et al. PRISMA Extension for Scoping Reviews (PRISMA ScR): Checklist and Explanation. *Ann Intern Med.* 2018;169:467–473. doi: [10.7326/M18-0850](https://doi.org/10.7326/M18-0850).

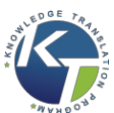

## Study Protocol

### **Rehabilitation delivery models for an ageing population: A scoping review protocol**

**Keywords:** Healthy Aging (Mesh); Aged (Mesh); Rehabilitation (Mesh); Recovery of Function (Mesh); Models, Organizational(Mesh); Health Services for the Aged(Mesh).

**Ethical approval:** The study did not involve human subjects and thus did not require ethical approval.

## Background

The astonishing success of preventive and curative health care services and the global socioeconomic development has led to worldwide population ageing associated with increasing life expectancy and declining fertility rates. However, at the same time, since non-communicable diseases (NCDs) disproportionately affect older people, the world is also facing an epidemiological transition to a higher incidence and prevalence of chronic NCDs<sup>1-3</sup>. A higher morbidity burden leads to a rapid increase in the number of people experiencing disability or declines in functioning, adding pressure to the health and social care systems<sup>4</sup>. These trends urge health policymakers to look for innovative approaches to achieve a not only longer but healthier and more meaningful life.

Healthy life in older age has been called by the World Health Organization in its World Report on Ageing and Health "Healthy Ageing" which is *"the process of developing and maintaining the functional ability that enables well-being in older age."* Functional ability is *"the health-related attributes that enable people to be and to do what they have reason to value, which is made up of the intrinsic capacity of the individual, relevant environmental characteristics, and the interactions between the individual and these characteristics"*<sup>2</sup>. The concept of functioning rooted in the WHO International Classification of Functioning, Disability, and Health (ICF)<sup>5</sup> is, in the author's perspective, very similar. Functioning is the *"outcome of complex interactions between the health state of an individual – is determined by health conditions and body functions and structures – and the physical, interpersonal, and social environment"*<sup>6</sup>.

Rehabilitation is an essential health service to improve functioning and hence the critical health strategy to achieve healthy ageing<sup>7</sup>. Rehabilitation has shown to be effective in improving functioning; reducing morbidity, including secondary complications, mortality, and health care use, including hospitalization episodes and length of stay; increasing individuals' participation in education, employment, and social life; and extending independent living. Rehabilitation interventions have also been shown to be cost-effective. However, besides its potential, rehabilitation is the health strategy that has received the least attention in the public's mind and among health policymakers. Rehabilitation is still not a priority of the healthy ageing research and policy agenda. There is a lack of knowledge about providing rehabilitation services to the ageing population. We lack a systematic understanding of how these services should be organized, who should benefit from them, what interventions should be provided, and by whom

and how to measure the outcomes of rehabilitation services aiming to foster healthy ageing at the individual and population level.

## **Aim**

To provide an overview of rehabilitation models being used to improve intrinsic capacity or functional ability in the ageing population.

## **Structured Research Question**

- P** Ageing population (older than 50 years)
- I** Rehabilitation models, strategies, and programs
- C** Not applicable
- O** Healthy ageing, functioning, functional ability, intrinsic capacity

## **Conceptual framework**

### **Healthy Ageing**

*"Is the process of developing and maintaining the functional ability that enables well-being in older age. Functional ability reflects a person's physical and mental capacities, the environments he or she inhabits and the ways in which people interact with their environment"*<sup>8</sup>

### **Ageing population**

*"Is the shift in the distribution of a country's population toward older ages. An increase in the population's mean or median age, a decline in the fraction of the population composed of children, or a rise in the fraction of the population that is elderly"*<sup>9</sup>

### **Rehabilitation**

*"A set of interventions designed to optimize functioning and reduce disability in individuals with health conditions in interaction with their environment"*<sup>10</sup>

### **Functioning**

The concept of functioning is rooted in the WHO International Classification of Functioning, Disability, and Health (ICF)<sup>5</sup> and is the *"outcome of complex interactions between the health state of an individual – is determined by health conditions and body functions and structures – and the physical, interpersonal, and social environment"*<sup>6</sup>.

## **International Classification of Functioning, Disability and Health (ICF)**

*« It is a classification of health and health-related domains. As the functioning and disability of an individual occurs in a context, ICF also includes a list of environmental factors. ICF is the WHO framework for measuring health and disability at both individual and population levels. It was officially endorsed by all 191 WHO Member States in the Fifty-fourth World Health Assembly on 22 May 2001(resolution WHA 54.21) as the international standard to describe and measure health and disability. ICF is based on the same foundation as ICD and ICHI and share the same set of extension codes that enable documentation at a higher level of detail"<sup>11</sup>*

### **Model of care**

*"Is defined as an evolving conception of how services should be delivered. The evolution of the model of care implies changes to services delivery processes in response, including in the design of care, organization of providers, management of services and continuous performance improvement"<sup>12</sup>*

### **Settings of care**

*"Describe the varied types of arrangements for services delivery, organized further into different facilities, institutions and organizations that provide care. Settings include ambulatory, community, home, in-patient and residential services, whereas facilities refer to infrastructure, such as clinics, health centres, district hospitals, dispensaries or other entities, for example, mobile clinics and pharmacies"<sup>13</sup>*

### **Types of care**

*"Refers to the varied aim of services, such as health protection, health promotion, disease prevention, diagnosis, treatment, management, long-term care, rehabilitation, and palliative care, with the specific population intervention and individual services delivered accordingly"<sup>13</sup>*

### **Care coordination**

*"A proactive approach in bringing care professionals and providers together around the needs of service users to ensure that people receive integrated and person-focused care across various settings"<sup>14</sup>*

### **Integrated health services**

*"The management and delivery of health services such that people receive a continuum of health promotion, disease prevention, diagnosis, treatment, disease-management,*

*rehabilitation and palliative care services, through the different levels and sites of care within the health system, and according to their needs throughout the life course"*<sup>14</sup>

### **Integrated health services delivery**

*"Is defined as an approach to strengthen people- centred health systems through the promotion of the comprehensive delivery of quality services across the life-course, designed according to the multidimensional needs of the population and the individual and delivered by a coordinated multidisciplinary team of providers working across settings and levels of care. It should be effectively managed to ensure optimal outcomes and the appropriate use of resources based on the best available evidence, with feedback loops to continuously improve performance and to tackle upstream causes of ill health and to promote well-being through intersectoral and multisectoral actions"*<sup>13</sup>

### **People-centred care**

*"An approach to care that consciously adopts individuals', carers', families' and communities' perspectives as participants in, and beneficiaries of, trusted health systems that respond to their needs and preferences in humane and holistic ways. People-centred care also requires that people have the education and support they need to make decisions and participate in their own care. It is organized around the health needs and expectations of people rather than diseases"*<sup>14</sup>

### **Person-centred care**

*"Care approaches and practices that see the person as a whole with many levels of needs and goals, with these needs coming from their own personal social determinants of health"*<sup>14</sup>

### **Person-centredness**

*"Is defined as the extent to which the delivery of services adopts a person-facing perspective, including selecting services according to an individual's needs and known risks, designing care to engage patient's in decision-making, organizing providers to realize their delivery, with management and improvement mechanisms in place towards optimal health outcomes"*<sup>13</sup>

### **People-centred health systems**

*"are defined as the design of core health system functions that prioritize the needs of individuals, their families and communities, both as participants and beneficiaries for high-quality comprehensive and coordinated services delivered in an equitable manner and involving people as partners in decision-making"*<sup>13</sup>



### **Primary care**

*"First-contact, accessible, continued, comprehensive and coordinated care to people and communities"*<sup>14</sup>

*"Describes a type of care and setting for health services delivery that supports first-contact, accessible, continued, comprehensive and coordinated care to individuals and communities"*<sup>12</sup>

*"Refers to the concept elaborated in the 1978 Declaration of Alma-Ata, which is based on the principles of equity, participation, intersectoral action, appropriate technology and a central role played by the health system"*<sup>14</sup>

### **Primary health care**

*"Refers to the approach elaborated in the 1978 Declaration of Alma-Ata based on the principles of equity, participation, intersectoral action, appropriate technology and a central role played by the health system for the delivery of services that are made universally accessible to individuals and families in the community through their full participation and at a cost that the community and country can afford to maintain at every stage of their development in the spirit of self-reliance and self-determination"*<sup>12</sup>

### **Primary care facilities**

*"Refer to ambulatory care facilities such as primary care centre, office of generalist health professional, ambulatory health care centre, family planning centre, home health care centre, nursing home, and polyclinic; other settings such as walk-in treatment centre, outpatient department of a district/general hospital, ambulance, mobile clinic, laboratory, pharmacy, and palliative care establishment; and, rural-specific facilities such as rural physician ambulatory, feldscher assistance point, midwifery post and rural health house"*<sup>12</sup>

### **Long-term care**

*"All activities undertaken by others to ensure that people with, or at risk of, a significant ongoing loss of capacity can maintain a level of functional ability consistent with their basic rights, fundamental freedoms and human dignity"*<sup>15</sup>

### **Residential long-term care facilities**

*"Also known as high dependency care facilities, are establishments primarily engaged in providing inpatient nursing and rehabilitative services to individuals requiring nursing care"*<sup>12</sup>

## **E-health**

*"Information and communication technologies that support the remote management of people and communities with a range of health care needs through supporting self-care and enabling electronic communications between health care professionals and patients"*<sup>14</sup>

## **M-health**

*"The use of mobile technologies to support health information and medical practices, often incorporated into services such as health call centres or emergency number services"*<sup>13</sup>

## **Telehealth**

*"The delivery of distance health services, such as remote clinical diagnosis and monitoring, as well as non-clinical functions, including prevention and promotion of health and curative services"*<sup>13</sup>

## **Health professionals**

*"Health professionals (ISCO-08 22) are professionals who establish and undertake research and develop and apply scientific knowledge in a range of health and related fields including: medicine, complementary medicine, dentistry, optometry, environmental health and occupational health. Specific occupations within the classification of health professionals include: physicians, nursing and midwifery professionals; paramedics; opticians; dentists; speech therapists; dieticians; psychiatrists; and, other health professionals. The tasks undertaken by health professionals involve: conducting research and obtaining scientific knowledge through the study of human and animal disorders; diagnosing illnesses and ways of treating them; the planning, management and evaluation of the care of patients; advising on or dispensing and applying preventive and curative measures; promoting health; and, preparing scientific papers and reports"*<sup>12</sup>

## **Allied health professionals**

*"Refers to a diverse group of health care professionals who provide necessary services to patients in addition to, or in place of, services provided by physicians, nurses and paramedical practitioners. Examples include medical technicians, speech therapists, physical therapists, etc"*<sup>12</sup>

## **Carers (family carers)**

*"Refer to individuals who provide unpaid care for a member or members of their family, friends or community (5). They can be any relative (spouse, children, daughter- and son-in-law), friend or neighbour who provides a broad range of assistance with personal care or basic activities of daily living to people with functional limitations. They may provide regular, occasional or routine, 'hands-on' care or be involved in organizing care delivered by others, sometimes even at-distance. Carers can live with or separately from the person receiving care. Carers are in contrast with providers associated with a formal service system, whether paid or on a volunteer basis (formal caregiver)"<sup>12</sup>*

### **Self-management or self-care**

*"The knowledge, skills and confidence to manage one's own health, to care for a specific condition or to recover from an episode of ill health"<sup>13</sup>*

### **Levels of care in rehabilitation**

*"The degree of specialization of care provided by rehabilitation health professionals. Inclusions: Primary, secondary, and tertiary levels of specialization"<sup>16</sup>*

### **Integration of care in rehabilitation**

*"The management of delivering rehabilitation services in conjunction with other health services so that people receive timely, comprehensive and well-coordinated care, according to their needs and across different levels (vertical integration) and along the continuum of care (horizontal integration). Inclusions: Continuum of care, admission and discharge planning, collaboration of health professionals, shared electronic patients' records"<sup>16</sup>*

### **Patient-centredness in rehabilitation**

*"Rehabilitation tailored on the person's needs and provided in partnership with them, their families and communities. Inclusions: Shared decision-making, individual rehabilitation plan, patient, family or other caregiver's education and empowerment, patient family or other caregiver's integration in the rehabilitation process, involvement of peer counsellors, involvement of patients as prosumers"<sup>16</sup>*

### **International Classification of Health intervention (ICHI)**

*"Is a common tool for reporting and analysing health interventions for clinical and statistical purposes. The classification is built around three axes: Target (the entity on which the Action is carried out), Action (a deed done by an actor to a target) and Means (the processes and*

methods by which the Action is carried out). Extension codes are shared with ICD and ICF in the common foundation and allow users to describe additional detail about the intervention in addition to the relevant ICHI code. A simple, logical syntax links ICHI stem codes and extension codes, interventions performed together, and packages of interventions"<sup>17</sup>

### **Universal health coverage (UHC) compendium**

« The UHC Compendium is a database of health services and intersectoral interventions designed to assist countries in making progress towards Universal Health Coverage (UHC). It provides a strategic way to organize and present information and creates a framework to think about health services and health interventions.<sup>18</sup>

### **Methodology**

The PRISMA extension for scoping reviews (PRISM ScR) checklist will be used to guide the scoping review’s methodology.<sup>19</sup>

### **Eligibility criteria:**

Included publications must describe rehabilitation model targeted at the ageing population and must additionally feature the inclusion criteria documented in **Error! Reference source not found..**

**Table 1. Eligibility criteria**

|                   | <b>Inclusion criteria</b>                                               | <b>Exclusion criteria</b>                                                                                                                                                                       |
|-------------------|-------------------------------------------------------------------------|-------------------------------------------------------------------------------------------------------------------------------------------------------------------------------------------------|
| <b>Population</b> | The research focus is the ageing population                             | Does not focus on people older than 50 years or, the paper does not describe the population age in the abstract and does not target a health condition prevalent in people older than 50 years. |
| <b>Scope</b>      | Describes a model for providing rehabilitation to the ageing population | Describes needs, functional patterns, disability, risk factors, or protective factors of the ageing population                                                                                  |
|                   |                                                                         | Aims to describe or test the effectiveness of a single intervention (e.g., Botulinum toxin for spasticity, exercise for heart failure                                                           |
|                   |                                                                         | The approach does not include rehabilitation interventions                                                                                                                                      |

|                         |                                                                                  |                                                                                                                                                                                                                                                                                                                                                                               |
|-------------------------|----------------------------------------------------------------------------------|-------------------------------------------------------------------------------------------------------------------------------------------------------------------------------------------------------------------------------------------------------------------------------------------------------------------------------------------------------------------------------|
| <b>Outcome</b>          | Aims to improve the functioning of the ageing population.                        | Aims to only improve morbidity, mortality, disease control related outcomes (e.g., serum glucose level, blood pressure, medication use, health services use), interventions adherence, interventions' perceived quality and willingness to continue, enjoyment, participation, health service's use, caregivers burden, implementation barriers or health workers perceptions |
| <b>Study type</b>       | Original research, including, intervention, observational or descriptive studies | Case report, case series, research protocol, letter to the editor, position paper, book or book chapter, narrative review, systematic review, meta-analysis, conference proceeding, grey literature, guideline or retraction letter                                                                                                                                           |
| <b>Language</b>         | Published in English                                                             | The full-text study's report is not available or is not available in English.                                                                                                                                                                                                                                                                                                 |
| <b>Publication year</b> | From January 2015 to May 2022                                                    |                                                                                                                                                                                                                                                                                                                                                                               |

### **Information sources and search strategy**

At least three authors will work together to build the systematic search strategy. We will conduct the search in indexed databases combining the following three main concepts:

- 1) Rehabilitation and functioning
- 2) Models of care or health care approaches
- 3) The ageing population

The search will include natural language and MeSH terms. We will restrict the search to English. We will not search grey literature, but we will revise the reference list of included studies. The final search strategy will be provided as supplementary material during the results dissemination strategy.

### **Study selection process**

Study selection will be completed in two phases:

- Title and abstract screening: Search results will be imported into an online systematic review software called Rayyan<sup>20</sup>. The inclusion criteria will be integrated into the software as a questionnaire that will be developed a priori. To ensure reliability between reviewers, we will

conduct training exercises prior to the formal screening. Teams of two reviewers will use the above eligibility criteria to screen titles and abstracts.

- Full-text screening: Teams of two reviewers will use the same eligibility criteria to screen the full texts of studies in duplicate and independently for eligibility. Similarly, if the decision to exclude or include an article is conflictive, a team meeting will be held with a third team member to make the final decision.

**Data extraction:**

Data extraction of included papers will be conducted individually and in duplicate. The following information will be extracted using a standardize data extraction form.

- **General characteristics of the study:** authors, country, publication year, study design, research outcome measures, and paper’s conclusion.
- **Characteristics of the studies’ target population:** age-related inclusion criteria, mean age, the number of participants, participants’ sex, target population, health condition.
- **Characteristics of the interventions provided:** data about rehabilitation interventions provided in each study and information about time and intensity.
- **Characteristics of the rehabilitation services or programs:** level of care, mode of service delivery, organisation of the service provision, including integrated, and information about the providers, including type, team organisation, and role or task shifting or sharing.

**Table 2. Variables included in the data extraction form**

| <b>Variable</b>         | <b>Description/instructions</b>                                                                                                               |
|-------------------------|-----------------------------------------------------------------------------------------------------------------------------------------------|
| <b>PMID</b>             | PMID number if available                                                                                                                      |
| <b>Title</b>            | Copy and paste from the paper                                                                                                                 |
| <b>Publication year</b> |                                                                                                                                               |
| <b>Journal</b>          |                                                                                                                                               |
| <b>Authors</b>          | Enter all author’s full name                                                                                                                  |
| <b>Abstract</b>         | Copy and paste from the paper                                                                                                                 |
| <b>Country</b>          | Add the country or countries in which the study took place. Use the country's English name, don't use abbreviations, and use capital letters. |
| <b>Study design</b>     | Copy and paste the study design reported in the paper                                                                                         |

|                                        |                                                                                                                                                                                                                                                                                                                                                                    |
|----------------------------------------|--------------------------------------------------------------------------------------------------------------------------------------------------------------------------------------------------------------------------------------------------------------------------------------------------------------------------------------------------------------------|
| <b>Target population</b>               | Copy and paste the description from the paper                                                                                                                                                                                                                                                                                                                      |
| <b>Health condition</b>                | Write the health condition's name. If patients with several single health conditions were included, add them separated by a comma without space. For example: diabetes,stroke,hip fracture.<br>If the target population was "patient with multimorbidity," just add multimorbidity. If it was fragility or patients with functional decline, enter not applicable. |
| <b>Age related-inclusion criteria</b>  | Copy and paste the description from the paper                                                                                                                                                                                                                                                                                                                      |
| <b>Mean age</b>                        | Enter the participant's mean age, up to two decimal points. If the mean age was reported only by groups, sum, and divide by the number of groups. For example, if two groups were included, sum the two mean ages, and divide by two.                                                                                                                              |
| <b>Number of participants</b>          | Enter the total number of participants, including intervention and control group                                                                                                                                                                                                                                                                                   |
| <b>Gender (%male)</b>                  | Enter the percentage of male participants. Only up to one decimal point                                                                                                                                                                                                                                                                                            |
| <b>Description of the intervention</b> | Copy and paste the entire description from the paper                                                                                                                                                                                                                                                                                                               |
| <b>Time and intensity</b>              | Enter information like, length of stay or treatment period, intermittent vs continuous treatments, duration of single treatments, number and duration of treatment sessions, and total duration of treatment, service hours.<br>If necessary: add Not reported/No applicable                                                                                       |
| <b>Paper's conclusion</b>              | Copy and paste the conclusion from the abstract                                                                                                                                                                                                                                                                                                                    |
| <b>Paper's conclusion category</b>     | Select one of the options: 1) Authors found the intervention effective. 2) Authors found the intervention not effective or not different than the usual care. 3) Can't be assessed                                                                                                                                                                                 |
| <b>Outcomes</b>                        | If there is more than one outcome, separate them with commas without spaces.<br>Ex: Independence in activities of daily living (Barthel index),Quality of life (SF-36)                                                                                                                                                                                             |
| <b>Providers</b>                       | Try to match your finding with any of the following:<br>Health care workers, allied health care workers, peers and volunteers, informal caregivers and family, the patient.<br>If there is more than one provider, separate them by commas with no                                                                                                                 |

|                                              |                                                                                                                                                                                                                                                                                                                                                                                                                                                                                                                                                                                                                                                                                                |
|----------------------------------------------|------------------------------------------------------------------------------------------------------------------------------------------------------------------------------------------------------------------------------------------------------------------------------------------------------------------------------------------------------------------------------------------------------------------------------------------------------------------------------------------------------------------------------------------------------------------------------------------------------------------------------------------------------------------------------------------------|
|                                              | spaces.<br>Ex: Health care workers, Community health workers                                                                                                                                                                                                                                                                                                                                                                                                                                                                                                                                                                                                                                   |
| <b>Multidisciplinary rehabilitation team</b> | Enter “Yes” if the at least 3 service providers were involved in the provision of interventions.                                                                                                                                                                                                                                                                                                                                                                                                                                                                                                                                                                                               |
| <b>Health workers</b>                        | Try to match your finding with any of the following:<br>Nurse, general practitioner, speech and language therapist, physical therapist, occupational therapists<br>prosthetist & orthotists, PRM Physicians, geriatrician, social workers, psychologist, community-based rehabilitation workers. If necessary, enter additional professions for example: neurologist, geriatricians. If there is more than one provider, separate them by commas with no spaces.<br>Ex: Nurse,Social workers,psychologist                                                                                                                                                                                      |
| <b>Level of care revised</b>                 | Select one of the options: Primary health care, specialized health care or multiple levels of care.                                                                                                                                                                                                                                                                                                                                                                                                                                                                                                                                                                                            |
| <b>Mode of service delivery</b>              | Try to match your finding with any of the following:<br>Outpatient, inpatient, home, eldercare institution, telerehabilitation, community<br>If there is more than one mode of service delivery, separate them by commas with no spaces.<br>Ex: outpatient,inpatient,telerehabilitation                                                                                                                                                                                                                                                                                                                                                                                                        |
| <b>Aim healthy ageing?</b>                   | Enter “Yes” if the papers stated the aim of contributing to healthy ageing                                                                                                                                                                                                                                                                                                                                                                                                                                                                                                                                                                                                                     |
| <b>Integrated care?</b>                      | Enter “Yes” if the paper matched the following definition of Integrated care:<br>Also known as integrated health, coordinated care, comprehensive care, seamless care, or transmural care, is a worldwide trend in health care reforms and new organizational arrangements focusing on more coordinated and integrated forms of care provision.<br>or the WHO definition: "Integrated care is a concept bringing together inputs, delivery, management and organization of services related to diagnosis, treatment, care, rehabilitation and health promotion.<br>Integration is a means to improve services in relation to access, quality, user satisfaction and efficiency <sup>21</sup> . |
| <b>Role or task shifting?</b>                | Enter “Yes” if the paper matched the following definition of role or task shifting: a process by which services that are typically delivered by a                                                                                                                                                                                                                                                                                                                                                                                                                                                                                                                                              |



---

type of health worker are moved to other with less extensive qualifications or training.<sup>22</sup>

---

Note: Enter not reported or not applicable accordingly.

### **Data synthesis:**

We will use a descriptive approach for the synthesis and presentation of information on the general characteristics of the studies. The synthesis will include quantitative, (e.g., frequency analysis) of study characteristics, rehabilitation interventions, and rehabilitation services provision (i.e., type of providers, level of care), and qualitative analysis to identify rehabilitation models.

### **References**

1. Vos T, Lim SS, Abbafati C, et al. Global burden of 369 diseases and injuries in 204 countries and territories, 1990–2019: a systematic analysis for the Global Burden of Disease Study 2019. *The Lancet* 2020;396(10258):1204-22.
2. World Health Organization. *World report on ageing and health: World Health Organization 2015.*
3. The World Health Organization. *World Health Statistics 2022: Monitoring health for the Sustainable Development Goals, 2022.*
4. Cieza A, Causey K, Kamenov K, et al. Global estimates of the need for rehabilitation based on the Global Burden of Disease study 2019: a systematic analysis for the Global Burden of Disease Study 2019. *The Lancet* 2020;396(10267):2006-17. doi: 10.1016/s0140-6736(20)32340-0
5. World Health Organization. *International Classification of Functioning, Disability and Health (ICF).* Geneva, Switzerland, 2001.
6. Stucki G, Bickenbach J. 1.1 Basic Concepts, Definitions and Models. *The Journal of the International Society of Physical and Rehabilitation Medicine* 2019;2(5) doi: 10.4103/jisprm.jisprm\_5\_19
7. Stucki G, Bickenbach J, Gutenbrunner C, et al. Rehabilitation: The health strategy of the 21st century. *Journal of rehabilitation medicine : official journal of the UEMS European Board of Physical and Rehabilitation Medicine* 2018;50(4):309-16. doi: 10.2340/16501977-2200
8. World Health Organization. *Decade of Healthy Ageing Baseline Report: World Health Organization 2020.*

9. Weil DN. Population aging: National bureau of economic research Cambridge, Mass., USA, 2006.
10. World Health Organization. Rehabilitation.
11. World Health Organization. International Classification of Functioning, Disability and Health (ICF) 2001 [Available from: <https://www.who.int/standards/classifications/international-classification-of-functioning-disability-and-health> accessed 05.09.2022.
12. World Health Organization, Regional office for Europe. GLOSSARY OF TERMS: WHO European Primary Health Care Impact, Performance and Capacity Tool (PHC-IMPACT). [https://www.euro.who.int/\\_\\_data/assets/pdf\\_file/0006/421944/Glossary-web-171219.pdf](https://www.euro.who.int/__data/assets/pdf_file/0006/421944/Glossary-web-171219.pdf).
13. World Health Organization, Regional office for Europe. Glossary of terms: The European Framework for Action on Integrated Health Services Delivery, 2016.
14. World Health Organization. WHO global strategy on integrated people-centred health services 2016-2026: Placing people and communities at the centre of health services, 2015.
15. Pot AM, Briggs AM, Beard JR, et al. Healthy Ageing and the need for a Long- term-care system: Global consultation on integrated care for older people (ICOPE)– the path to universal health coverage, 2017.
16. Gutenbrunner C, Nugraha B, Gimigliano F, et al. International Classification of Service Organization in Rehabilitation: An updated set of categories (ICSO-R 2.0). Journal of rehabilitation medicine : official journal of the UEMS European Board of Physical and Rehabilitation Medicine 2020;52(1):jrm00004. doi: 10.2340/16501977-2627 [published Online First: 20200102]
17. World Health Organization. International Classification of Health Interventions (ICHI).
18. World Health Organization. Universal Health Coverage Compendium
19. Tricco AC, Lillie E, Zarin W, et al. PRISMA extension for scoping reviews (PRISMA-ScR): checklist and explanation. Annals of internal medicine 2018;169(7):467-73.
20. Ouzzani M, Hammady H, Fedorowicz Z, et al. Rayyan—a web and mobile app for systematic reviews. Systematic reviews 2016;5(1):1-10.
21. Gröne O, Garcia-Barbero M. Integrated care: a position paper of the WHO European Office for Integrated Health Care Services. International journal of integrated care 2001;1
22. Organization WH. The world health report 2006: working together for health: World Health Organization 2006.



## Supplementary Material 3

Search concepts, terms, and search strategies for each bibliographic database queried.

**Table S1. Summary of search concepts and terms**

| Concepts                 | Natural language                                                                                                                                                                                                                                                                                                                                                                                                                                                                                                                                                                                                                                                                                                                  | Medical subject headings                                                                                                                                                                                                                                                                                                                                                                                                           |
|--------------------------|-----------------------------------------------------------------------------------------------------------------------------------------------------------------------------------------------------------------------------------------------------------------------------------------------------------------------------------------------------------------------------------------------------------------------------------------------------------------------------------------------------------------------------------------------------------------------------------------------------------------------------------------------------------------------------------------------------------------------------------|------------------------------------------------------------------------------------------------------------------------------------------------------------------------------------------------------------------------------------------------------------------------------------------------------------------------------------------------------------------------------------------------------------------------------------|
| <b>Rehabilitation</b>    | functioning, convalescence, Telerehabilitation, restorative, rehabi*, reablement, re-ablement, enablement, "speech therapy", "self management", "self-management", "self care", "self-care", "rehabilitation medicine", recover*, "recovery of function", "physical therapy", "physical function", "physical exercise", "patient* recovery", "occupational therapy", "occupational functioning", "language therapy", "intrinsic capacit*", "instrumental ADLs", "instrumental activities of daily living", "healthy aging", "functional status", "Functional recovery", "functional health", "functional gain", "functional autonomy", "functional abilit*", "cognitive function*", "activities of daily living", "active ageing" | Convalescence, Rehabilitation Research, Rehabilitation Centers, Telerehabilitation, Speech Therapy, Self-Management, Self Efficacy, Self Care, Rehabilitation, Recovery of Function, Physical Therapy Modalities, Physical and Rehabilitation Medicine, Occupational Therapy, Language Therapy, International Classification of Functioning, Disability and Health, Independent Living, Healthy Aging, Activities of Daily Living. |
| <b>Ageing population</b> | frail, fragility, geria*, retir*, seni*, "old age", "physical decline*", "cognitive decline*", "community-dwelling older adults", "function* impairment*", "Functioning decline", ageing, aging, elder*, "older patients", "older adult*", "older person*", "older people"                                                                                                                                                                                                                                                                                                                                                                                                                                                        | Aged, 80 and over, Aged, Middle Aged, Frail Elderly, Geriatrics, Age Factors, Sarcopenia                                                                                                                                                                                                                                                                                                                                           |

|                 |                                                                                                                                                                                                                                                                |                                                                                                                                                                                                                                                                                                                                                                                                                                                                                                                                                                                                                                                      |
|-----------------|----------------------------------------------------------------------------------------------------------------------------------------------------------------------------------------------------------------------------------------------------------------|------------------------------------------------------------------------------------------------------------------------------------------------------------------------------------------------------------------------------------------------------------------------------------------------------------------------------------------------------------------------------------------------------------------------------------------------------------------------------------------------------------------------------------------------------------------------------------------------------------------------------------------------------|
| <b>Services</b> | "health planning", "health program", "health service*", "patient care planning", "Community-based", "Community health service", telemonitoring, "transitional care", telehealth, Telerehabilitation, "Long-Term Care", "care model", "team approach", Telecare | Treatment Outcome, Telerehabilitation, Telemedicine, Senior Centers, Program Evaluation, Primary Health Care, Patient Care Team, Patient Care Management, Models, Organizational, Long-Term Care, Home Care Services, Home Care Services, Hospital-Based, Health Services for the Aged, Geriatric Assessment, Delivery of Health Care, Integrated, Comprehensive Health Care, Community Health Nursing, Transitional Care, Quality of Health Care, Program Development, Patient-Centered Care, Outpatient Clinics, Hospital, National Health Programs, Health Services, Health Services Needs and Demand, Health Planning, Community Health Services |
|-----------------|----------------------------------------------------------------------------------------------------------------------------------------------------------------------------------------------------------------------------------------------------------------|------------------------------------------------------------------------------------------------------------------------------------------------------------------------------------------------------------------------------------------------------------------------------------------------------------------------------------------------------------------------------------------------------------------------------------------------------------------------------------------------------------------------------------------------------------------------------------------------------------------------------------------------------|

**Table S2. Academic Search Medline search strategy**

| #           | Query                                                                                                                                                                                                                                                      | Results   |
|-------------|------------------------------------------------------------------------------------------------------------------------------------------------------------------------------------------------------------------------------------------------------------|-----------|
| <b>S124</b> | S43 AND S69 AND S122                                                                                                                                                                                                                                       | 17,285    |
| <b>S123</b> | S43 AND S69 AND S122                                                                                                                                                                                                                                       | 47,440    |
| <b>S122</b> | (S70 OR S71 OR S72 OR S73 OR S74 OR S75 OR S76 OR S77 OR S78 OR S79 OR S80 OR S81 OR S82 OR S83 OR S84 OR S85 OR S86 OR S87 OR S88 OR S89 OR S90 OR S91 OR S92 OR S93 OR S94 OR S95 OR S96 OR S97 OR S98 OR S99 OR S100 OR S101 OR S102 OR S103 OR S104 OR | 1,459,100 |

|             |                                                                                                                                       |         |
|-------------|---------------------------------------------------------------------------------------------------------------------------------------|---------|
|             | S105 OR S106 OR S107 OR S108 OR S109 OR S110 OR S111 OR S112 OR S113 OR S114 OR S115 OR S116 OR S117 OR S118 OR S119 OR S120 OR S121) |         |
| <b>S121</b> | TI functioning OR AB functioning                                                                                                      | 203,555 |
| <b>S120</b> | TI convalescence OR AB convalescence                                                                                                  | 5,210   |
| <b>S119</b> | TI Telerehabilitation OR AB Telerehabilitation                                                                                        | 1,136   |
| <b>S118</b> | TI restorative OR AB restorative                                                                                                      | 23,889  |
| <b>S117</b> | TI rehabi* OR AB rehabi*                                                                                                              | 187,961 |
| <b>S116</b> | TI reablement OR AB reablement                                                                                                        | 122     |
| <b>S115</b> | TI re-ablement OR AB re-ablement                                                                                                      | 19      |
| <b>S114</b> | TI enablement OR AB enablement                                                                                                        | 649     |
| <b>S113</b> | TI "speech therapy" OR AB "speech therapy"                                                                                            | 2,659   |
| <b>S112</b> | TI "self management" OR AB "self management" OR TI "self-management" OR AB "self-management"                                          | 22,395  |
| <b>S111</b> | TI "self care" OR AB "self care" OR TI "self-care" OR AB "self-care"                                                                  | 21,067  |
| <b>S110</b> | TI "rehabilitation medicine" OR AB "rehabilitation medicine"                                                                          | 1,936   |
| <b>S109</b> | TI recover* OR AB recover*                                                                                                            | 742,299 |
| <b>S108</b> | TI "recovery of function" OR AB "recovery of function"                                                                                | 2,500   |
| <b>S107</b> | TI "physical therapy" OR AB "physical therapy"                                                                                        | 20,119  |
| <b>S106</b> | TI "physical function" OR AB "physical function"                                                                                      | 16,488  |
| <b>S105</b> | TI "physical exercise" OR AB "physical exercise"                                                                                      | 17,758  |
| <b>S104</b> | TI "patient* recovery" OR AB "patient* recovery"                                                                                      | 3,652   |
| <b>S103</b> | TI "occupational therapy" OR AB "occupational therapy"                                                                                | 10,884  |
| <b>S102</b> | TI "occupational functioning" OR AB "occupational functioning"                                                                        | 1,159   |
| <b>S101</b> | TI "language therapy" OR AB "language therapy"                                                                                        | 1,396   |
| <b>S100</b> | TI "intrinsic capacit*" OR AB "intrinsic capacit*"                                                                                    | 865     |
| <b>S99</b>  | TI "instrumental ADLs" OR AB "instrumental ADLs"                                                                                      | 203     |
| <b>S98</b>  | TI "instrumental activities of daily living" OR AB "instrumental activities of daily living"                                          | 4,595   |
| <b>S97</b>  | TI "healthy aging" OR AB "healthy aging"                                                                                              | 5,560   |

|            |                                                                           |        |
|------------|---------------------------------------------------------------------------|--------|
| <b>S96</b> | TI "functional status" OR AB "functional status"                          | 27,844 |
| <b>S95</b> | TI "Functional recovery" OR AB "Functional recovery"                      | 23,888 |
| <b>S94</b> | TI "functional health" OR AB "functional health"                          | 2,277  |
| <b>S93</b> | TI "functional gain" OR AB "functional gain"                              | 621    |
| <b>S92</b> | TI "functional autonomy" OR AB "functional autonomy"                      | 488    |
| <b>S91</b> | TI "functional abilit*" OR AB "functional abilit*"                        | 7,554  |
| <b>S90</b> | TI "cognitive function*" OR AB "cognitive function*"                      | 72,253 |
| <b>S89</b> | TI "activities of daily living" OR AB "activities of daily living"        | 30,175 |
| <b>S88</b> | TI "active ageing" OR AB "active ageing"                                  | 290    |
| <b>S87</b> | (MH "Convalescence")                                                      | 3,899  |
| <b>S86</b> | (MH "Rehabilitation Research")                                            | 232    |
| <b>S85</b> | (MH "Rehabilitation Centers")                                             | 8,532  |
| <b>S84</b> | (MH "Telerehabilitation")                                                 | 754    |
| <b>S83</b> | (MH "Speech Therapy")                                                     | 6,701  |
| <b>S82</b> | (MH "Self-Management")                                                    | 4,424  |
| <b>S81</b> | (MH "Self Efficacy")                                                      | 23,098 |
| <b>S80</b> | (MH "Self Care")                                                          | 35,221 |
| <b>S79</b> | (MH "Rehabilitation")                                                     | 18,647 |
| <b>S78</b> | (MH "Recovery of Function")                                               | 58,180 |
| <b>S77</b> | (MH "Physical Therapy Modalities")                                        | 39,346 |
| <b>S76</b> | (MH "Physical and Rehabilitation Medicine")                               | 3,486  |
| <b>S75</b> | (MH "Occupational Therapy")                                               | 14,210 |
| <b>S74</b> | (MH "Language Therapy")                                                   | 2,040  |
| <b>S73</b> | (MH "International Classification of Functioning, Disability and Health") | 775    |
| <b>S72</b> | (MH "Independent Living")                                                 | 9,537  |
| <b>S71</b> | (MH "Healthy Aging")                                                      | 1,721  |
| <b>S70</b> | (MH "Activities of Daily Living")                                         | 70,033 |

|            |                                                                                                                                                                             |           |
|------------|-----------------------------------------------------------------------------------------------------------------------------------------------------------------------------|-----------|
| <b>S69</b> | S44 OR S45 OR S46 OR S47 OR S48 OR S49 OR S50 OR S51 OR S52 OR S53 OR S54 OR S55 OR S56 OR S57 OR S58 OR S59 OR S60 OR S61 OR S62 OR S63 OR S64 OR S65 OR S66 OR S67 OR S68 | 5,821,140 |
| <b>S68</b> | TI frail OR AB frail                                                                                                                                                        | 14,773    |
| <b>S67</b> | TI fragility OR AB fragility                                                                                                                                                | 18,027    |
| <b>S66</b> | TI geria* OR AB geria*                                                                                                                                                      | 55,508    |
| <b>S65</b> | TI retir* OR AB retir*                                                                                                                                                      | 24,285    |
| <b>S64</b> | TI seni* OR AB seni*                                                                                                                                                        | 65,198    |
| <b>S63</b> | TI "old age" OR AB "old age"                                                                                                                                                | 27,502    |
| <b>S62</b> | TI "physical decline*" OR AB "physical decline*"                                                                                                                            | 441       |
| <b>S61</b> | TI "cognitive decline*" OR AB "cognitive decline*"                                                                                                                          | 27,657    |
| <b>S60</b> | TI "community-dwelling older adults" OR AB "community-dwelling older adults"                                                                                                | 7,180     |
| <b>S59</b> | TI "function* impairment*" OR AB "function* impairment*"                                                                                                                    | 25,251    |
| <b>S58</b> | TI "Functioning decline" OR AB "Functioning decline"                                                                                                                        | 44        |
| <b>S57</b> | TI ageing OR AB ageing                                                                                                                                                      | 47,107    |
| <b>S56</b> | TI aging OR AB aging                                                                                                                                                        | 203,996   |
| <b>S55</b> | TI elder* OR AB elder*                                                                                                                                                      | 282,288   |
| <b>S54</b> | TI "older patients" OR AB "older patients"                                                                                                                                  | 44,253    |
| <b>S53</b> | TI "older adult*" OR AB "older adult*"                                                                                                                                      | 99,963    |
| <b>S52</b> | TI "older person*" OR AB "older person*"                                                                                                                                    | 12,707    |
| <b>S51</b> | TI "older people" OR AB "older people"                                                                                                                                      | 33,134    |
| <b>S50</b> | (MH "Aged, 80 and over")                                                                                                                                                    | 1,003,407 |
| <b>S49</b> | (MH "Aged")                                                                                                                                                                 | 3,339,004 |
| <b>S48</b> | (MH "Middle Aged")                                                                                                                                                          | 4,669,969 |
| <b>S47</b> | (MH "Frail Elderly")                                                                                                                                                        | 13,772    |
| <b>S46</b> | (MM "Geriatrics")                                                                                                                                                           | 27,118    |
| <b>S45</b> | (MM "Age Factors")                                                                                                                                                          | 6,297     |
| <b>S44</b> | (MH "Sarcopenia")                                                                                                                                                           | 7,326     |



|            |                                                                                                                                                                                                                                                                                                       |         |
|------------|-------------------------------------------------------------------------------------------------------------------------------------------------------------------------------------------------------------------------------------------------------------------------------------------------------|---------|
| <b>S43</b> | S1 OR S2 OR S3 OR S4 OR S5 OR S6 OR S7 OR S8 OR S9 OR S10 OR<br>S11 OR S12 OR S13 OR S14 OR S15 OR S16 OR S17 OR S18 OR S19 OR<br>S20 OR S21 OR S22 OR S23 OR S24 OR S25 OR S26 OR S27 OR S28 OR<br>S29 OR S30 OR S31 OR S32 OR S33 OR S34 OR S35 OR S36 OR S37 OR<br>S38 OR S39 OR S40 OR S41 OR S42 | 833,703 |
| <b>S42</b> | TI "health planning" OR AB "health planning"                                                                                                                                                                                                                                                          | 3,600   |
| <b>S41</b> | TI "health program" OR AB "health program"                                                                                                                                                                                                                                                            | 5,859   |
| <b>S40</b> | TI "health service*" OR AB "health service*"                                                                                                                                                                                                                                                          | 120,965 |
| <b>S39</b> | TI "patient care planning" OR AB "patient care planning"                                                                                                                                                                                                                                              | 114     |
| <b>S38</b> | TI "Community-based" OR AB "Community-based"                                                                                                                                                                                                                                                          | 68,095  |
| <b>S37</b> | TI "Community health service" OR AB "Community health service"                                                                                                                                                                                                                                        | 503     |
| <b>S36</b> | TI telemonitoring OR AB telemonitoring                                                                                                                                                                                                                                                                | 1,816   |
| <b>S35</b> | TI "transitional care" OR AB "transitional care"                                                                                                                                                                                                                                                      | 1,668   |
| <b>S34</b> | TI telehealth OR AB telehealth                                                                                                                                                                                                                                                                        | 7,883   |
| <b>S33</b> | TI Telerehabilitation OR AB Telerehabilitation                                                                                                                                                                                                                                                        | 1,136   |
| <b>S32</b> | TI "Long-Term Care" OR AB "Long-Term Care"                                                                                                                                                                                                                                                            | 22,967  |
| <b>S31</b> | TI program                                                                                                                                                                                                                                                                                            | 165,422 |
| <b>S30</b> | TI "care model" OR AB "care model"                                                                                                                                                                                                                                                                    | 6,323   |
| <b>S29</b> | TI "team approach" OR AB "team approach"                                                                                                                                                                                                                                                              | 6,898   |
| <b>S28</b> | TI Telecare OR AB Telecare                                                                                                                                                                                                                                                                            | 710     |
| <b>S27</b> | (MM "Treatment Outcome")                                                                                                                                                                                                                                                                              | 8,065   |
| <b>S26</b> | (MH "Telerehabilitation")                                                                                                                                                                                                                                                                             | 754     |
| <b>S25</b> | (MH "Telemedicine")                                                                                                                                                                                                                                                                                   | 33,078  |
| <b>S24</b> | (MH "Senior Centers")                                                                                                                                                                                                                                                                                 | 104     |
| <b>S23</b> | (MM "Program Evaluation")                                                                                                                                                                                                                                                                             | 11,451  |
| <b>S22</b> | (MM "Primary Health Care")                                                                                                                                                                                                                                                                            | 54,906  |
| <b>S21</b> | (MM "Patient Care Team")                                                                                                                                                                                                                                                                              | 28,993  |
| <b>S20</b> | (MM "Patient Care Management")                                                                                                                                                                                                                                                                        | 3,018   |
| <b>S19</b> | (MM "Models, Organizational")                                                                                                                                                                                                                                                                         | 6,482   |
| <b>S18</b> | (MH "Long-Term Care")                                                                                                                                                                                                                                                                                 | 27,588  |

|            |                                            |        |
|------------|--------------------------------------------|--------|
| <b>S17</b> | (MH "Home Care Services")                  | 35,507 |
| <b>S16</b> | (MM "Home Care Services, Hospital-Based")  | 1,579  |
| <b>S15</b> | (MH "Health Services for the Aged")        | 18,137 |
| <b>S14</b> | (MH "Geriatric Assessment")                | 31,005 |
| <b>S13</b> | (MH "Delivery of Health Care, Integrated") | 13,902 |
| <b>S12</b> | (MH "Comprehensive Health Care")           | 6,747  |
| <b>S11</b> | (MH "Community Health Nursing")            | 19,737 |
| <b>S10</b> | (MH "Transitional Care")                   | 1,111  |
| <b>S9</b>  | (MH "Quality of Health Care")              | 76,490 |
| <b>S8</b>  | (MH "Program Development")                 | 30,183 |
| <b>S7</b>  | (MH "Patient-Centered Care")               | 21,980 |
| <b>S6</b>  | (MH "Outpatient Clinics, Hospital")        | 15,835 |
| <b>S5</b>  | (MH "National Health Programs")            | 33,146 |
| <b>S4</b>  | (MH "Health Services")                     | 26,636 |
| <b>S3</b>  | (MH "Health Services Needs and Demand")    | 54,889 |
| <b>S2</b>  | (MH "Health Planning")                     | 21,898 |
| <b>S1</b>  | (MH "Community Health Services")           | 32,760 |

**Limiters: Date of Publication: 20150101-20220531; English Language; Human**

**Table S3. Academic Search Medline search strategy**

| <b>#</b>   | <b>Query</b>                                                                                                                                      | <b>Results</b> |
|------------|---------------------------------------------------------------------------------------------------------------------------------------------------|----------------|
| <b>#11</b> | #7 AND #8 AND #9                                                                                                                                  | 4,867          |
| <b>#10</b> | #7 AND #8 AND #9                                                                                                                                  | 12,197         |
| <b>#9</b>  | #3 OR #6                                                                                                                                          | 1,626,662      |
| <b>#8</b>  | #2 OR #5                                                                                                                                          | 898,194        |
| <b>#7</b>  | #1 OR #4                                                                                                                                          | 917,320        |
| <b>#6</b>  | functioning:ti,kw OR convalescence:ti,kw OR telerehabilitation:ab,ti,kw<br>OR restorative:ti,kw OR rehabi*:ab,ti,kw OR reablement:ab,ti,kw OR re- | 1,469,268      |

|           |                                                                                                                                                                                                                                                                                                                                                                                                                                                                                                                                                                                                                                                                                                                                                                                                                                                                                                                                                                |         |
|-----------|----------------------------------------------------------------------------------------------------------------------------------------------------------------------------------------------------------------------------------------------------------------------------------------------------------------------------------------------------------------------------------------------------------------------------------------------------------------------------------------------------------------------------------------------------------------------------------------------------------------------------------------------------------------------------------------------------------------------------------------------------------------------------------------------------------------------------------------------------------------------------------------------------------------------------------------------------------------|---------|
|           | <p>ablement:ab,ti,kw OR enablement:ab,ti,kw OR 'speech therapy':ab,ti,kw OR 'self management':ti,kw OR 'self-management':ti,kw OR 'self care':ti,kw OR 'self-care':ti,kw OR 'rehabilitation medicine':ab,ti,kw OR recover*:ab,ti,kw OR 'recovery of function':ab,ti,kw OR 'physical therapy':ab,ti,kw OR 'physical function':ti,kw OR 'physical exercise':ti,kw OR 'patient*recovery':ti,kw OR 'occupational therapy':ab,ti,kw OR 'occupational functioning':ab,ti,kw OR 'language therapy':ab,ti,kw OR 'intrinsic capacit*':ab,ti,kw OR 'instrumental adls':ab,ti,kw OR 'instrumental activities of daily living':ab,ti,kw OR 'healthy aging':ab,ti,kw OR 'functional status':ti,kw OR 'functional recovery':ab,ti,kw OR 'functional health':ab,ti,kw OR 'functional gain':ab,ti,kw OR 'functional autonomy':ab,ti,kw OR 'functional abilit*':ab,ti,kw OR 'cognitive function*':ti,kw OR 'activities of dailyliving':ab,ti,kw OR 'active ageing':ab,ti,kw</p> |         |
| <b>#5</b> | <p>frail:ab,ti,kw OR fragility:ab,ti,kw OR geria*:ab,ti,kw OR retir*:ti,kw OR seni*:ab,ti,kw OR 'old age':ti,kw OR 'physical decline*':ab,ti,kw OR 'cognitive decline*':ab,ti,kw OR 'community-dwelling older adults':ab,ti,kw OR 'function* impairment*':ti,kw OR 'functioning decline':ti,kw OR ageing:ti,kw OR aging:ti,kw OR elder*:ab,ti,kw OR 'older patients':ti,kw OR 'older adult*':ti,kw OR 'older person*':ti,kw OR 'older people':ti,kw</p>                                                                                                                                                                                                                                                                                                                                                                                                                                                                                                        | 860,667 |
| <b>#4</b> | <p>'health program':ab,ti,kw OR 'health service*':ab,ti,kw OR 'patient care planning':ab,ti,kw OR 'community-based':ab,ti,kw OR 'community health service':ab,ti,kw OR telemonitoring:ab,ti,kw OR 'transional care':ab,ti,kw OR telehealth:ab,ti,kw OR telerehabilitation:ab,ti,kw OR 'long-term care':ab,ti,kw OR program:ti OR 'care model':ab,ti,kw OR 'team approach':ab,ti,kw OR telecare:ab,ti,kw</p>                                                                                                                                                                                                                                                                                                                                                                                                                                                                                                                                                    | 479,293 |
| <b>#3</b> | <p>'convalescence'/mj OR 'rehabilitation research'/exp OR 'rehabilitation center'/exp OR 'telerehabilitation'/exp OR 'speech therapy'/exp OR 'self care'/mj OR 'rehabilitation'/exp/mj OR 'physiotherapy'/exp OR 'rehabilitation medicine'/exp OR 'occupational therapy'/exp OR 'language therapy'/exp OR 'international classification of functioning, disability and health'/exp OR 'independent living'/exp OR 'healthy aging'/exp OR 'daily life activity'/mj</p>                                                                                                                                                                                                                                                                                                                                                                                                                                                                                          | 329,501 |
| <b>#2</b> | <p>'very elderly'/exp/mj OR 'aged'/exp/mj OR 'middle aged'/exp/mj</p>                                                                                                                                                                                                                                                                                                                                                                                                                                                                                                                                                                                                                                                                                                                                                                                                                                                                                          | 108,048 |

---

OR 'geriatrics'/exp/mj OR 'sarcopenia'/exp/mj

---

**#1** treatment outcome'/mj OR 'telerehabilitation'/mj OR 'telemedicine'/mj OR 'senior center'/mj OR 'program evaluation'/mj OR 'primary health care'/mj OR 'patient care'/mj OR 'long term care'/mj OR 'home care'/mj OR 'elderly care'/exp/mj OR 'geriatric assessment'/mj OR 'integrated health care system'/mj OR 'health care'/mj OR 'community health nursing'/mj OR 'transitional care'/mj OR 'health care quality'/mj OR 'program development'/exp/mj OR 'outpatient department'/mj OR 'health service'/mj OR 'health care planning'/mj OR 'community care'/mj

**Limiters: Date of Publication: 20150101-20220531; English Language; Human**

---

## Supplementary Material 4

Supplementary Table 1. Included studies' most important characteristics

| First author, year             | Country           | Study design        | Authors' conclusion | Target population               | Health condition                                   | Health condition area | Inclusion criterion in years | N° participants | Participants' mean age | Participants' sex predominance |
|--------------------------------|-------------------|---------------------|---------------------|---------------------------------|----------------------------------------------------|-----------------------|------------------------------|-----------------|------------------------|--------------------------------|
| <b>Diaz Baquero, A., 2022</b>  | Spain             | Intervention study  | Effective           | Single health condition         | Cognitive impairment including dementia or aphasia | Neurological          | –                            | 62              | 74.73                  | Female                         |
| <b>Liang, C. C., 2022</b>      | Taiwan            | Observational Study | Effective           | Fragility or functional decline | –                                                  | –                     | > 65                         | 56              | 76.5                   | Female                         |
| <b>Porta, F. L., 2022</b>      | Italy             | Intervention study  | Not effective       | Fragility or functional decline | –                                                  | –                     | > 65                         | 403             | 76.2                   | Female                         |
| <b>Yee, D. K. H., 2022</b>     | China (Hong Kong) | Observational Study | Effective           | Single health condition         | Hip fracture or post hip arthroplasty              | Musculoskeletal       | > 65                         | 401             | 84.2                   | Female                         |
| <b>Poulsen, L. K., 2022</b>    | Denmark           | Intervention study  | No assessed         | Single health condition         | Hip fracture or post hip arthroplasty              | Musculoskeletal       | –                            | 48              | 78                     | Female                         |
| <b>Stathi, A., 2022</b>        | UK                | Intervention study  | Effective           | Fragility or functional decline | –                                                  | –                     | > 65                         | 777             | 77.6                   | Female                         |
| <b>Tekin, F., 2022</b>         | Turkey            | Intervention study  | Effective           | Fragility or functional decline | –                                                  | –                     | > 65                         | 255             | 69                     | Balanced                       |
| <b>Hoedemakers, M., 2022</b>   | Netherlands       | Intervention study  | No assessed         | Fragility or functional decline | –                                                  | –                     | –                            | 384             | 83.4                   | Female                         |
| <b>Ropke, A., 2022</b>         | Denmark           | Intervention study  | No assessed         | Single health condition         | Hip fracture or post hip arthroplasty              | Musculoskeletal       | > 65                         | 18              | 79.4                   | Female                         |
| <b>Bennell, K. L., 2022</b>    | Australia         | Intervention study  | Effective           | Single health condition         | Osteoarthritis                                     | Musculoskeletal       | Other                        | 414             | 65                     | Balanced                       |
| <b>Chong, E., 2022</b>         | Singapore         | Intervention study  | Effective           | Fragility or functional decline | –                                                  | –                     | > 65                         | 140             | 79.7                   | Female                         |
| <b>Kam Yuet Wong, F., 2022</b> | China             | Intervention study  | Effective           | Single health condition         | Stroke                                             | Neurological          | >18                          | 116             | 66.6                   | Male                           |
| <b>Love, 2022</b>              | Australia         | Observational Study | No assessed         | Multimorbidity                  | –                                                  | –                     | > 65                         | 92              | 81.1                   | Balanced                       |
| <b>Kalav, S., 2022</b>         | Turkey            | Intervention study  | No assessed         | Single health condition         | Stroke                                             | Neurological          | >18                          | 68              | 57.4                   | Male                           |
| <b>Ullrich, P., 2022</b>       | Germany           | Intervention study  | Effective           | Multimorbidity                  | –                                                  | –                     | > 65                         | 118             | 82.3                   | Female                         |
| <b>Mora-Traverso, M., 2022</b> | Spain             | Intervention study  | Effective           | Single health condition         | Hip fracture or post hip arthroplasty              | Musculoskeletal       | > 65                         | 64              | 78.22                  | Female                         |

|                               |                    |                     |             |                                 |                                                    |                       |       |      |       |          |
|-------------------------------|--------------------|---------------------|-------------|---------------------------------|----------------------------------------------------|-----------------------|-------|------|-------|----------|
| <b>Gustavson, A. M., 2022</b> | US                 | Intervention study  | No assessed | Fragility or functional decline | –                                                  | –                     | –     | 28   | 78.5  | Female   |
| <b>Tao, G., 2022</b>          | Canada             | Intervention study  | No assessed | Single health condition         | Lower limb amputation                              | Musculoskeletal       | > 50  | 71   | 65    | Male     |
| <b>Yang, L., 2022</b>         | China              | Intervention study  | Effective   | Single health condition         | Cognitive impairment including dementia or aphasia | Neurological          | > 65  | 126  | 85.36 | Female   |
| <b>Furuta, K., 2022</b>       | Japan              | Intervention study  | Effective   | Fragility or functional decline | –                                                  | –                     | < 85  | 25   | 76    | Female   |
| <b>Li, C. T., 2022</b>        | China (Hong Kong)  | Intervention study  | No assessed | Single health condition         | Hip fracture or post hip arthroplasty              | Musculoskeletal       | > 60  | 31   | 79    | Female   |
| <b>Tan, J. Y., 2022</b>       | US                 | Descriptive study   | No assessed | Single health condition         | HIV                                                | Communicable diseases | > 50  | 13   | –     | Male     |
| <b>U. N. Yadav, 2021</b>      | Nepal              | Descriptive study   | No assessed | Multimorbidity                  | –                                                  | –                     | –     | –    | –     | –        |
| <b>S. Tanaka, 2021</b>        | Japan              | Intervention study  | Effective   | Single health condition         | COPD                                               | Neurological          | –     | 31   | 86.15 | Balanced |
| <b>A. Sondell, 2021</b>       | Sweden             | Intervention study  | Effective   | Single health condition         | COPD                                               | Neurological          | > 60  | 16   | 78.5  | Female   |
| <b>W. Rietkerk, 2021</b>      | Netherlands        | Intervention study  | Effective   | Fragility or functional decline | –                                                  | –                     | > 75  | 233  | 81.5  | Female   |
| <b>M. E. Ribbink, 2021</b>    | Netherlands, Spain | Observational Study | No assessed | Multimorbidity                  | –                                                  | –                     | –     | 1038 | 83.85 | Balanced |
| <b>R. Quigley, 2021</b>       | Australia          | Descriptive study   | Effective   | Fragility or functional decline | –                                                  | –                     | Other | 26   | 87    | Balanced |
| <b>C. L. Peiris, 2021</b>     | Australia          | Observational Study | Effective   | Single health condition         | Osteoarthritis                                     | Musculoskeletal       | > 65  | 230  | 70.5  | Female   |
| <b>M. Morri, 2021</b>         | Italy              | Observational Study | Effective   | Single health condition         | Hip fracture or post hip arthroplasty              | Musculoskeletal       | > 65  | 923  | 84.1  | Female   |
| <b>H. Kim, 2021</b>           | South Korea        | Intervention study  | Effective   | Fragility or functional decline | –                                                  | –                     | –     | 913  | 82.9  | Female   |
| <b>A. Flynn, 2021</b>         | Australia          | Intervention study  | No assessed | Single health condition         | Parkinson's disease                                | Neurological          | –     | 40   | 72    | Male     |
| <b>R. De Luca, 2021</b>       | Italy              | Intervention study  | Effective   | Fragility or functional decline | –                                                  | –                     | > 65  | 60   | 77.4  | Female   |
| <b>S. Coskun, 2021</b>        | Turkey             | Intervention study  | Effective   | Single health condition         | Coronary heart disease                             | Cardiovascular        | > 60  | 66   | 68.13 | Male     |
| <b>Y. Baba, 2021</b>          | Japan              | Intervention study  | Effective   | Fragility or functional decline | –                                                  | –                     | > 65  | 78   | 83.65 | Female   |

|                                 |                          |                     |               |                                 |                                                                                           |                                    |       |     |      |          |
|---------------------------------|--------------------------|---------------------|---------------|---------------------------------|-------------------------------------------------------------------------------------------|------------------------------------|-------|-----|------|----------|
| <b>Coletta, A. M., 2021</b>     | United States of America | Observational Study | Effective     | Single health condition         | Breast cancer, prostate cancer, lymphoma                                                  | Cancer                             | _     | 239 | 62.1 | Female   |
| <b>Lamberti, N., 2021</b>       | Italy                    | Observational Study | Effective     | Single health condition         | Peripheral artery disease                                                                 | Cardiovascular                     | >18   | 83  | 72   | Male     |
| <b>Maniscalco, M., 2021</b>     | Italy                    | Intervention study  | Effective     | Multimorbidity                  | Cardiovascular disease not specified, covid-19                                            | Cardiovascular                     | _     | 95  | 63.4 | Male     |
| <b>Otero, P., 2021</b>          | Spain                    | Intervention study  | Effective     | Fragility or functional decline | _                                                                                         | _                                  | Other | 25  | 54.9 | Female   |
| <b>Tseng, M. Y., 2021</b>       | Taiwan                   | Intervention study  | Not effective | Multimorbidity                  | Hip fracture or post hip arthroplasty, cognitive impairment including dementia or aphasia | Musculoskeletal, neurological      | > 60  | 152 | 81.8 | Female   |
| <b>Kim, S., 2021</b>            | Korea                    | Intervention study  | Effective     | Fragility or functional decline | _                                                                                         | _                                  | > 65  | 224 | 75   | Female   |
| <b>Sun, F. C., 2021</b>         | Taiwan                   | Intervention study  | Effective     | Fragility or functional decline | _                                                                                         | _                                  | > 65  | 122 | 73.9 | Female   |
| <b>Farinha, C., 2021</b>        | Portugal                 | Intervention study  | Effective     | Fragility or functional decline | _                                                                                         | _                                  | > 65  | 102 | 71.4 | Female   |
| <b>Hayden, M. C., 2021</b>      | Germany                  | Observational Study | Effective     | Single health condition         | Covid-19                                                                                  | Respiratory, communicable diseases | >18   | 108 | 55.6 | Balanced |
| <b>Barker, K. L., 2021</b>      | England                  | Intervention study  | Not effective | Single health condition         | Osteoarthritis                                                                            | Musculoskeletal                    | Other | 621 | 70.4 | Balanced |
| <b>Meisingset, I., 2021</b>     | Norway                   | Observational Study | Effective     | Fragility or functional decline | _                                                                                         | _                                  | > 65  | 603 | 84   | Female   |
| <b>Al Chikhanie, Y., 2021</b>   | France                   | Observational Study | No assessed   | Single health condition         | COPD                                                                                      | Respiratory                        | _     | 190 | 66   | Balanced |
| <b>Suikkanen, S., 2021</b>      | Finland                  | Intervention study  | Effective     | Fragility or functional decline | _                                                                                         | _                                  | > 65  | 300 | 82.2 | Female   |
| <b>Brouwers, R. W. M., 2021</b> | Netherlands              | Intervention study  | Effective     | Single health condition         | Coronary heart disease                                                                    | Cardiovascular                     | _     | 300 | 60.7 | Male     |
| <b>Patel, N., 2021</b>          | United States of America | Observational Study | Effective     | Single health condition         | Covid-19                                                                                  | Respiratory, communicable diseases | _     | 106 | 64   | Male     |
| <b>Yi, D., 2021</b>             | Korea                    | Intervention study  | Effective     | Single health condition         | Covid-19                                                                                  | Respiratory, communicable diseases | > 65  | 70  | 76.7 | Female   |

|                                         |                          |                     |               |                                 |                                                               |                            |       |     |      |          |
|-----------------------------------------|--------------------------|---------------------|---------------|---------------------------------|---------------------------------------------------------------|----------------------------|-------|-----|------|----------|
| <b>Chi, Y. C., 2021</b>                 | Taiwan                   | Intervention study  | Effective     | Fragility or functional decline | –                                                             | –                          | > 65  | –   | –    | Female   |
| <b>Gutierrez-Espinoza, H., 2021</b>     | Chile                    | Observational Study | Effective     | Single health condition         | Complex regional pain syndrome type I, distal radius fracture | Musculoskeletal            | > 60  | 72  | 52.8 | Female   |
| <b>Su, S. F., 2021</b>                  | Taiwan                   | Intervention study  | Effective     | Single health condition         | Hip fracture or post hip arthroplasty                         | Musculoskeletal            | > 60  | 104 | 77.7 | Female   |
| <b>Hosteng, K. R., 2021</b>             | United States of America | Intervention study  | Effective     | Fragility or functional decline | –                                                             | –                          | > 65  | 68  | 81.2 | Female   |
| <b>Chiu, E. C., 2021</b>                | Taiwan                   | Intervention study  | Effective     | Single health condition         | Stroke                                                        | Neurological               | Other | 26  | 68   | Male     |
| <b>Martinez-Velilla, N., 2021</b>       | Chile                    | Intervention study  | Effective     | Fragility or functional decline | –                                                             | –                          | –     | 297 | 87.3 | Balanced |
| <b>Gutierrez-Lopez, L., 2021</b>        | Mexico                   | Intervention study  | Effective     | Single health condition         | Sarcopenia                                                    | Metabolic, musculoskeletal | < 70  | 60  | 68   | Female   |
| <b>Sen, E. I., 2021</b>                 | Turkey                   | Intervention study  | Effective     | Single health condition         | Sarcopenia                                                    | Musculoskeletal            | < 80  | 90  | 72.8 | Female   |
| <b>Sok, S., 2021</b>                    | Korea                    | Intervention study  | Effective     | Fragility or functional decline | –                                                             | –                          | > 65  | 65  | 73.7 | Female   |
| <b>Jungreitmayr, S., 2021</b>           | Austria, Italy           | Intervention study  | Effective     | Fragility or functional decline | –                                                             | –                          | < 85  | 72  | 75.5 | Female   |
| <b>Liang, C. K., 2021</b>               | Taiwan                   | Intervention study  | Effective     | Fragility or functional decline | –                                                             | –                          | > 65  | 733 | 74   | Female   |
| <b>Oh, S. L., 2021</b>                  | South Korea              | Intervention study  | Effective     | Single health condition         | Osteoarthritis                                                | Musculoskeletal            | –     | 60  | 71.7 | Female   |
| <b>Pakrad, F., 2021</b>                 | Iran                     | Intervention study  | Effective     | Single health condition         | Coronary heart disease                                        | Cardiovascular             | –     | 88  | 62.7 | Female   |
| <b>Siercke, M., 2021</b>                | Denmark                  | Intervention study  | Effective     | Single health condition         | Peripheral artery disease                                     | Cardiovascular             | >18   | 118 | 70.3 | Balanced |
| <b>Tou, N. X., 2021</b>                 | Singapore                | Intervention study  | Effective     | Fragility or functional decline | –                                                             | –                          | Other | 57  | 71.7 | Female   |
| <b>Monteblanco Cavalcante, M., 2021</b> | Brazil                   | Intervention study  | Effective     | Fragility or functional decline | –                                                             | –                          | –     | 9   | 71.9 | Balanced |
| <b>Borges-Machado, F., 2021</b>         | Portugal                 | Intervention study  | Effective     | Single health condition         | Cognitive impairment including dementia or aphasia            | Neurological               | > 60  | 43  | 78.2 | Female   |
| <b>Murphy, S. L., 2021</b>              | United States of America | Intervention study  | Not effective | Single health condition         | Diffuse cutaneous systemic sclerosis                          | Autoimmune disease         | >18   | 32  | 52   | Female   |



|                                 |                                                      |                     |               |                                 |                                                    |                 |       |     |      |          |
|---------------------------------|------------------------------------------------------|---------------------|---------------|---------------------------------|----------------------------------------------------|-----------------|-------|-----|------|----------|
| <b>Bruce, J., 2021</b>          | England                                              | Intervention study  | Effective     | Single health condition         | Breast cancer                                      | Cancer          | >18   | 392 | 58.1 | Female   |
| <b>Rosado, H., 2021</b>         | Portugal                                             | Intervention study  | Effective     | Fragility or functional decline | –                                                  | –               | > 65  | 51  | 75.4 | Male     |
| <b>Tian, R., 2021</b>           | China                                                | Intervention study  | Effective     | Single health condition         | Cognitive impairment including dementia or aphasia | Neurological    | < 80  | 93  | 66.9 | Female   |
| <b>Noh, E. Y., 2021</b>         | Korea                                                | Observational Study | Effective     | Fragility or functional decline | –                                                  | –               | > 65  | 877 | –    | Female   |
| <b>Aguilera-Godoy, A., 2021</b> | Chile                                                | Observational Study | No assessed   | Single health condition         | Distal radius fracture                             | Musculoskeletal | > 60  | 36  | 68.5 | Female   |
| <b>Mentz, R. J., 2021</b>       | United States of America                             | Observational Study | Effective     | Single health condition         | Heart failure                                      | Cardiovascular  | > 60  | 349 | 72.7 | Balanced |
| <b>Pepera, G., 2021</b>         | Greece                                               | Intervention study  | Effective     | Fragility or functional decline | –                                                  | –               | > 65  | 40  | 79.4 | Female   |
| <b>Rince, G., 2021</b>          | France                                               | Intervention study  | Effective     | Fragility or functional decline | –                                                  | –               | > 70  | 483 | 83.1 | Female   |
| <b>Arena, S. K., 2021</b>       | United States of America                             | Intervention study  | Effective     | Fragility or functional decline | –                                                  | –               | > 65  | 110 | 76.9 | Female   |
| <b>Scherrenberg, M., 2021</b>   | The Netherlands, Denmark, France, Spain, Switzerland | Intervention study  | Effective     | Single health condition         | Cardiovascular disease not specified               | Cardiovascular  | –     | 162 | 72.8 | Male     |
| <b>Mao, H. F., 2021</b>         | Taiwan                                               | Intervention study  | Effective     | Fragility or functional decline | –                                                  | –               | > 65  | 130 | 78.2 | Female   |
| <b>Rafiq, M. T., 2021</b>       | Malaysia                                             | Intervention study  | Effective     | Multimorbidity                  | –                                                  | –               | Other | 114 | 52.9 | Balanced |
| <b>Bagkur, M., 2021</b>         | Cyprus                                               | Intervention study  | Effective     | Fragility or functional decline | –                                                  | –               | < 90  | 23  | 72.4 | Female   |
| <b>Backer, H. C., 2021</b>      | Germany                                              | Intervention study  | Effective     | Single health condition         | Osteoarthritis                                     | Musculoskeletal | < 85  | 60  | 64.3 | Balanced |
| <b>Katri Maria, T., 2021</b>    | Finland                                              | Intervention study  | No assessed   | Fragility or functional decline | –                                                  | –               | > 60  | 117 | 79.8 | Female   |
| <b>Ozen, S., 2021</b>           | Turkey                                               | Intervention study  | Effective     | Single health condition         | Stroke                                             | Cardiovascular  | < 85  | 38  | 65.9 | Male     |
| <b>Soukkio, P. K., 2021</b>     | Finland                                              | Intervention study  | Not effective | Single health condition         | Hip fracture or post hip arthroplasty              | Musculoskeletal | > 60  | 121 | 81.5 | Female   |
| <b>Woo, J., 2021</b>            | China (Hong Kong)                                    | Descriptive study   | No assessed   | Fragility or functional decline | –                                                  | –               | –     | 102 | 84   | Female   |

|                             |                          |                     |               |                                 |                        |                 |       |     |       |          |
|-----------------------------|--------------------------|---------------------|---------------|---------------------------------|------------------------|-----------------|-------|-----|-------|----------|
| <b>Lim, J. H., 2021</b>     | Republic of Korea        | Intervention study  | Effective     | Single health condition         | Stroke                 | Neurological    | _     | 17  | 70.11 | Balanced |
| <b>Song, C. Y., 2021</b>    | Taiwan                   | Intervention study  | Effective     | Fragility or functional decline | _                      | _               | > 65  | 28  | 76    | Female   |
| <b>Z. Wu, 2020</b>          | China                    | Intervention study  | Effective     | Single health condition         | Coronary heart disease | Neurological    | < 80  | 64  | 57.6  | Male     |
| <b>J. Uddin, 2020</b>       | Bangladesh               | Intervention study  |               | Single health condition         | Coronary heart disease | Cardiovascular  | Other | 142 | 54    | Male     |
| <b>K. A. Spencer, 2020</b>  | United States of America | Intervention study  | No assessed   | Single health condition         | Parkinson's disease    | Neurological    | > 50  | 3   | 62    | Male     |
| <b>Y. Song, 2020</b>        | China                    | Intervention study  | Effective     | Single health condition         | Coronary heart disease | Cardiovascular  | Other | 96  | 54.45 | Male     |
| <b>H. N. Smith, 2020</b>    | Australia                | Descriptive study   | Effective     | Fragility or functional decline | _                      | _               | Other | 110 | 80.4  | Balanced |
| <b>J. Sedlock, 2020</b>     | United States of America | Descriptive study   | No assessed   | Single health condition         | Fracture not specified | Musculoskeletal | > 65  | _   | _     | _        |
| <b>J. Room, 2020</b>        | United Kingdom           | Descriptive study   | No assessed   | Single health condition         | Osteoarthritis         | Musculoskeletal | Other | 635 | _     | _        |
| <b>V. Provencher, 2020</b>  | Australia                | Intervention study  | No assessed   | Fragility or functional decline | _                      | _               | > 70  | 400 | 80.5  | Female   |
| <b>M. Parsons, 2020</b>     | New Zealand              | Intervention study  | Effective     | Single health condition         | Injuries               | Musculoskeletal | > 65  | 403 | 80.8  | Female   |
| <b>A. Nakayama, 2020</b>    | Japan                    | Observational Study | Effective     | Single health condition         | Heart failure          | Cardiovascular  | _     | 236 | 66    | Balanced |
| <b>I. Nabutovsky, 2020</b>  | Israel                   | Intervention study  | Effective     | Single health condition         | Coronary heart disease | Cardiovascular  | _     | 22  | 52.7  | Male     |
| <b>J. S. Myers, 2020</b>    | United States of America | Intervention study  | Effective     | Single health condition         | Breast cancer          | Cancer          | >18   | 61  | 55.6  | Female   |
| <b>J. Miller, 2020</b>      | Canada                   | Intervention study  | Effective     | Multimorbidity                  | _                      | _               | _     | 102 | 52.8  | Female   |
| <b>M. Markle-Reid, 2020</b> | Canada                   | Intervention study  | Not effective | Single health condition         | Stroke                 | Neurological    | Other | 30  | 71.6  | Balanced |
| <b>J. Mann, 2020</b>        | Australia                | Descriptive study   | No assessed   | Fragility or functional decline | _                      | _               | Other | _   | _     | _        |
| <b>W.-Y. Li, 2020</b>       | Taiwan                   | Intervention study  | Effective     | Single health condition         | Chronic kidney disease | Urological      | Other | 49  | 51.2  | Male     |
| <b>M. Kraepelien, 2020</b>  | Sweden                   | Intervention study  | Effective     | Single health condition         | Parkinson's disease    | Neurological    | _     | 77  | 66    | Female   |

|                              |                          |                     |               |                                 |                                                    |                 |       |     |       |          |
|------------------------------|--------------------------|---------------------|---------------|---------------------------------|----------------------------------------------------|-----------------|-------|-----|-------|----------|
| <b>E. H. Koolen, 2020</b>    | Netherlands              | Intervention study  | No assessed   | Single health condition         | COPD                                               | Respiratory     | _     | 402 | 63    | Balanced |
| <b>M. V. Knudsen, 2020</b>   | Denmark                  | Intervention study  | Not effective | Single health condition         | Coronary heart disease                             | Cardiovascular  | _     | 77  | 58    | Male     |
| <b>O. Kamoen, 2020</b>       | Belgium                  | Observational Study | Effective     | Single health condition         | Stroke                                             | Neurological    | >18   | 214 | 68.15 | Male     |
| <b>H. Hansen, 2020</b>       | Denmark                  | Intervention study  | Not effective | Single health condition         | COPD                                               | Respiratory     | _     | 134 | 68.3  | Balanced |
| <b>A. M. Gustavson, 2020</b> | United States of America | Intervention study  | No assessed   | Fragility or functional decline | _                                                  | _               | _     | 103 | 77.65 | Male     |
| <b>A. W. Deng, 2020</b>      | China                    | Intervention study  | Effective     | Single health condition         | Stroke                                             | Neurological    | _     | 98  | 61.4  | Male     |
| <b>J. de Batlle, 2020</b>    | Spain                    | Intervention study  | Effective     | Fragility or functional decline | _                                                  | _               | Other | 135 | 78    | Balanced |
| <b>S. S. Conroy, 2020</b>    | United States of America | Intervention study  | Effective     | Single health condition         | Stroke                                             | Neurological    | >18   | 29  | 60.95 | Balanced |
| <b>D. Hevey, 2020</b>        | United Kingdom           | Intervention study  | Effective     | Multimorbidity                  | _                                                  | _               | _     | 273 | _     | Female   |
| <b>D. S. Lipardo, 2020</b>   | Philippines              | Intervention study  | Effective     | Fragility or functional decline | _                                                  | _               | > 60  | 92  | 69    | Female   |
| <b>K. Laver, 2020</b>        | Australia                | Intervention study  | Effective     | Single health condition         | Cognitive impairment including dementia or aphasia | Neurological    | _     | 63  | 79.9  | Balanced |
| <b>A. K. C. Wong, 2019</b>   | China (Hong Kong)        | Intervention study  | Effective     | Fragility or functional decline | _                                                  | _               | > 60  | 457 | 78    | Female   |
| <b>K. von Storch, 2019</b>   | Germany                  | Intervention study  | Effective     | Single health condition         | Diabetes                                           | Metabolic       | Other | 115 | 58.9  | Balanced |
| <b>M. Ranner, 2019</b>       | Sweden                   | Descriptive study   | Effective     | Single health condition         | Stroke                                             | Neurological    | _     | 10  | 68    | Male     |
| <b>B. B. Nilsson, 2019</b>   | Norway                   | Observational Study | Effective     | Single health condition         | Cardiovascular disease not specified               | Cardiovascular  | _     | 273 | 56    | Male     |
| <b>R. Maddison, 2019</b>     | New Zealand              | Intervention study  | Effective     | Single health condition         | Cardiovascular disease not specified               | Cardiovascular  | >18   | 162 | 61    | Male     |
| <b>Y. Ko, 2019</b>           | South Korea              | Intervention study  | Effective     | Single health condition         | Hip fracture or post hip arthroplasty              | Musculoskeletal | > 65  | 34  | 76.7  | Female   |
| <b>W. Ji, 2019</b>           | South Korea              | Intervention study  | Effective     | Single health condition         | Lung cancer                                        | Cancer          | < 80  | 64  | 59.2  | Male     |
| <b>J. Hou, 2019</b>          | China                    | Intervention study  | Effective     | Single health condition         | Low back pain                                      | Musculoskeletal | Other | 168 | 50.2  | Balanced |

|                                                |                          |                     |               |                                 |                                                    |                |      |     |       |          |
|------------------------------------------------|--------------------------|---------------------|---------------|---------------------------------|----------------------------------------------------|----------------|------|-----|-------|----------|
| <b>R. Hwang<br/>N. R. Morris<br/>A. , 2019</b> | Australia                | Intervention study  | Effective     | Single health condition         | Heart failure                                      | Cardiovascular | _    | 53  | 67    | Male     |
| <b>W. Choi, 2019</b>                           | South Korea              | Intervention study  | Effective     | Fragility or functional decline | _                                                  | _              | > 65 | 60  | 76.25 | Female   |
| <b>S. C. Cramer, 2019</b>                      | United States of America | Intervention study  | Effective     | Single health condition         | Stroke                                             | Neurological   | >18  | 124 | 61    | Male     |
| <b>D. K. Y. Chan, 2019</b>                     | Australia                | Observational Study | Effective     | Fragility or functional decline | _                                                  | _              | _    | 369 | 82.9  | Female   |
| <b>T. Lindhardt, 2019</b>                      | Denmark                  | Intervention study  | Effective     | Fragility or functional decline | _                                                  | _              | > 65 | 330 | 75    | Balanced |
| <b>C. D. S. Langoni, 2019</b>                  | Brazil                   | Intervention study  | Effective     | Fragility or functional decline | _                                                  | _              | > 60 | 52  | 72.25 | Female   |
| <b>P. Bernocchi, 2019</b>                      | Italy                    | Intervention study  | Effective     | Fragility or functional decline | _                                                  | _              | > 65 | 283 | 78.6  | Balanced |
| <b>H. R. Dial, 2019</b>                        | United States of America | Observational Study | Effective     | Single health condition         | Cognitive impairment including dementia or aphasia | Neurological   | _    | 31  | 66.3  | Balanced |
| <b>S. Isernia, 2019</b>                        | Italy                    | Intervention study  | Effective     | Single health condition         | Neurological disease not specified                 | Neurological   | < 80 | 107 | 77.2  | Balanced |
| <b>T. H. Nøst, 2018</b>                        | Norway                   | Intervention study  | Not effective | Single health condition         | Chronic pain                                       | Pain           | >18  | 121 | 52.7  | Female   |
| <b>T. H. Nøst, 2018</b>                        | Norway                   | Intervention study  | Not effective | Single health condition         | Chronic pain                                       | Pain           | >18  | 121 | 53    | Female   |
| <b>S. Mohammadi-Kalaveh, 2018</b>              | Iran                     | Intervention study  | Effective     | Multimorbidity                  | _                                                  | _              | _    | 30  | 55.8  | Balanced |
| <b>V. M. Mendoza-Núñez, 2018</b>               | Mexico                   | Intervention study  | No assessed   | Fragility or functional decline | _                                                  | _              | _    | 64  | 66    | Female   |
| <b>K. S. McGilton, 2018</b>                    | Canada                   | Intervention study  | Effective     | Single health condition         | Stroke                                             | Neurological   | _    | 35  | 70    | Male     |
| <b>M. Markle-Reid, 2018</b>                    | Canada                   | Intervention study  | Effective     | Multimorbidity                  | _                                                  | _              | > 65 | 159 | _     | Balanced |
| <b>E. Lycholip, 2018</b>                       | Netherlands              | Intervention study  | Not effective | Single health condition         | Heart failure                                      | Cardiovascular | >18  | 118 | 68    | Male     |
| <b>L. Lachance, 2018</b>                       | United States of America | Observational Study | Effective     | Single health condition         | Diabetes                                           | Metabolic      | >18  | 161 | 60.35 | _        |
| <b>J. T. Kamwesiga, 2018</b>                   | Uganda                   | Intervention study  | Effective     | Single health condition         | Stroke                                             | Neurological   | >18  | 28  | 59.85 | Female   |

|                               |                                                             |                     |               |                                 |                                                    |                 |       |      |       |          |
|-------------------------------|-------------------------------------------------------------|---------------------|---------------|---------------------------------|----------------------------------------------------|-----------------|-------|------|-------|----------|
| <b>M. Inzitari, 2018</b>      | Spain                                                       | Intervention study  | No assessed   | Fragility or functional decline | –                                                  | –               | Other | 185  | 81.6  | Female   |
| <b>S. A. Hicks, 2018</b>      | United States of America                                    | Observational Study | Effective     | Fragility or functional decline | –                                                  | –               | –     | 285  | 79.45 | Balanced |
| <b>M. He, 2018</b>            | China                                                       | Intervention study  | Effective     | Single health condition         | Stroke                                             | Neurological    | –     | 2935 | 57.8  | Balanced |
| <b>M. C. V. Gonzaga, 2018</b> | United States of America                                    | Intervention study  | Effective     | Single health condition         | Heart failure                                      | Cardiovascular  | –     | 20   | –     | Female   |
| <b>N. Godtfredsen, 2018</b>   | Denmark                                                     | Observational Study | Effective     | Single health condition         | COPD                                               | Respiratory     | –     | 581  | 68.1  | Balanced |
| <b>C. B. Franse, 2018</b>     | United Kingdom, Greece, Croatia, the Netherlands and Spain. | Intervention study  | Effective     | Fragility or functional decline | –                                                  | –               | > 75  | 1844 | 79.5  | Balanced |
| <b>I. H. J. Everink, 2018</b> | Netherlands                                                 | Observational Study | Effective     | Fragility or functional decline | –                                                  | –               | > 65  | 149  | 80.15 | Female   |
| <b>D. M. Ehde, 2018</b>       | United States of America                                    | Intervention study  | Effective     | Single health condition         | Multiple sclerosis                                 | Neurological    | >18   | 163  | 52.2  | –        |
| <b>C. Dye, 2018</b>           | United States of America                                    | Intervention study  | Effective     | Multimorbidity                  | –                                                  | –               | > 60  | 53   | –     | –        |
| <b>P. W. Duncan, 2018</b>     | United States of America                                    | Descriptive study   | No assessed   | Single health condition         | Stroke                                             | Neurological    | –     | 871  | –     | Balanced |
| <b>A. Döbler, 2018</b>        | Germany                                                     | Intervention study  | Effective     | Single health condition         | Diabetes                                           | Metabolic       | < 70  | 199  | 52    | Male     |
| <b>S. G. Dean, 2018</b>       | United Kingdom                                              | Intervention study  | No assessed   | Single health condition         | Stroke                                             | Neurological    | >18   | 45   | 70.5  | Male     |
| <b>C. K. Clevenger, 2018</b>  | United States of America                                    | Descriptive study   | Effective     | Single health condition         | Cognitive impairment including dementia or aphasia | Neurological    | –     | 119  | 78.6  | Female   |
| <b>L. Chen, 2018</b>          | China                                                       | Intervention study  | Effective     | Single health condition         | Stroke                                             | Neurological    | >18   | 144  | 65.3  | Male     |
| <b>A. Avila, 2018</b>         | Belgium                                                     | Intervention study  | Not effective | Single health condition         | Coronary heart disease                             | Cardiovascular  | < 75  | 90   | 60.7  | Male     |
| <b>O. Adogwa, 2018</b>        | United States of America                                    | Descriptive study   | Effective     | Single health condition         | Degenerative scoliosis                             | Musculoskeletal | > 65  | 125  | 73.3  | Balanced |
| <b>Y. Zhang, 2018</b>         | China                                                       | Intervention study  | Effective     | Single health condition         | Coronary heart disease                             | Cardiovascular  | –     | 130  | 70.1  | Male     |

|                                    |                          |                     |               |                                 |                                       |                 |      |     |       |          |
|------------------------------------|--------------------------|---------------------|---------------|---------------------------------|---------------------------------------|-----------------|------|-----|-------|----------|
| <b>P. Zhang, 2018</b>              | China                    | Intervention study  | Effective     | Single health condition         | Coronary heart disease                | Cardiovascular  | _    | 240 | 65.9  | Balanced |
| <b>P. J. Whitehead, 2018</b>       | United Kingdom           | Intervention study  | Effective     | Fragility or functional decline | _                                     | _               | > 65 | 60  | 77    | Balanced |
| <b>S. Ward, 2018</b>               | United Kingdom           | Observational Study | Effective     | Single health condition         | COPD                                  | Respiratory     | _    | 123 | 69.6  | Balanced |
| <b>J. Wang, 2018</b>               | China                    | Intervention study  | Effective     | Single health condition         | Hip fracture or post hip arthroplasty | Musculoskeletal | _    | 389 | 55.6  | Male     |
| <b>M. R. J. van Lieshout, 2018</b> | Netherlands              | Intervention study  | Not effective | Fragility or functional decline | _                                     | _               | > 65 | 281 | 74    | Balanced |
| <b>B. Valdivieso, 2018</b>         | Spain                    | Intervention study  | Effective     | Multimorbidity                  | _                                     | _               | >18  | 472 | 73.08 | Balanced |
| <b>M. Tistad, 2018</b>             | Sweden                   | Intervention study  | No assessed   | Single health condition         | Stroke                                | Neurological    | _    | 68  | 72.6  | Male     |
| <b>E. Taube, 2018</b>              | Sweden                   | Intervention study  | Effective     | Fragility or functional decline | _                                     | _               | > 65 | 153 | 81.5  | Female   |
| <b>J. L. Roberts, 2018</b>         | United Kingdom           | Intervention study  | No assessed   | Single health condition         | Hip fracture or post hip arthroplasty | Musculoskeletal | > 65 | 61  | _     | _        |
| <b>R. L. Reed, 2018</b>            | Australia                | Intervention study  | Effective     | Multimorbidity                  | _                                     | _               | > 60 | 254 | _     | Balanced |
| <b>D. Martel, 2018</b>             | Canada                   | Intervention study  | Effective     | Fragility or functional decline | _                                     | _               | > 65 | 44  | 73.5  | Female   |
| <b>A. I. I. King, 2018</b>         | New Zealand              | Descriptive study   | Effective     | Fragility or functional decline | _                                     | _               | > 75 | 5   | _     | _        |
| <b>K. Finlayson, 2018</b>          | Australia                | Intervention study  | Effective     | Fragility or functional decline | _                                     | _               | > 65 | 222 | 77.6  | Female   |
| <b>M. Melin, 2018</b>              | Sweden                   | Intervention study  | Effective     | Single health condition         | Heart failure                         | Cardiovascular  | >18  | 82  | 75    | Male     |
| <b>R. L. Burton, 2018</b>          | Canada                   | Intervention study  | No assessed   | Single health condition         | Neurological disease not specified    | Neurological    | _    | 6   | 71.8  | Female   |
| <b>J. Hong, 2018</b>               | Republic of Korea        | Intervention study  | Effective     | Fragility or functional decline | _                                     | _               | > 65 | 23  | 79.8  | Female   |
| <b>M. Renda, 2018</b>              | United States of America | Intervention study  | Effective     | Single health condition         | Neurological disease not specified    | Neurological    | >18  | 4   | 59.7  | Balanced |
| <b>K. D. Allen, 2018</b>           | United States of America | Intervention study  | Not effective | Single health condition         | Osteoarthritis                        | Musculoskeletal | _    | 350 | 65.3  | Female   |
| <b>A. O'Moore K, 2018</b>          | Australia                | Intervention study  | Effective     | Single health condition         | Osteoarthritis                        | Musculoskeletal | > 50 | 69  | 62    | Balanced |

|                                 |                            |                     |             |                                 |                                                    |                             |       |      |       |          |
|---------------------------------|----------------------------|---------------------|-------------|---------------------------------|----------------------------------------------------|-----------------------------|-------|------|-------|----------|
| <b>C. Anderson-Hanley, 2018</b> | United States of America   | Intervention study  | Effective   | Fragility or functional decline | –                                                  | –                           | –     | 14   | 78.1  | Female   |
| <b>P. Bernocchi, 2018</b>       | Italy                      | Intervention study  | Effective   | Single health condition         | COPD, heart failure                                | Cardiovascular, respiratory | –     | 112  | 70    | Male     |
| <b>L. Zhang, 2017</b>           | China                      | Intervention study  | Effective   | Single health condition         | Coronary heart disease                             | Cardiovascular              | < 75  | 126  | 63.1  | Male     |
| <b>F. A. Vega-Ramírez, 2017</b> | Spain                      | Observational Study | Effective   | Fragility or functional decline | –                                                  | –                           | –     | 473  | 83    | Balanced |
| <b>R. Uittenbroek, 2017</b>     | Netherlands                | Intervention study  | Effective   | Fragility or functional decline | –                                                  | –                           | > 75  | 1456 | 80.75 | Balanced |
| <b>S. Tanaka, 2017</b>          | Japan                      | Intervention study  | Effective   | Single health condition         | Cognitive impairment including dementia or aphasia | Neurological                | –     | 60   | 85.4  | Female   |
| <b>X. Ru, 2017</b>              | China                      | Intervention study  | Effective   | Single health condition         | Stroke                                             | Neurological                | –     | 964  | 68.95 | Balanced |
| <b>S. Palmcrantz, 2017</b>      | Sweden                     | Intervention study  | No assessed | Single health condition         | Stroke                                             | Neurological                | –     | 15   | 66    | Balanced |
| <b>A.-F. Leclerc, 2017</b>      | Belgium                    | Intervention study  | Effective   | Single health condition         | Breast cancer                                      | Cancer                      | –     | 209  | 53.35 | Female   |
| <b>P. Kitzman, 2017</b>         | United States of America   | Intervention study  | Effective   | Single health condition         | Stroke                                             | Neurological                | –     | 30   | 65    | Balanced |
| <b>I. H. J. Everink, 2017</b>   | Netherlands                | Intervention study  | No assessed | Fragility or functional decline | –                                                  | –                           | > 65  | 189  | 81    | Female   |
| <b>M. S. Holstege, 2017</b>     | Netherlands                | Observational Study | Effective   | Fragility or functional decline | –                                                  | –                           | –     | 743  | 80    | Female   |
| <b>K. M. Hjelle, 2017</b>       | Norway                     | Descriptive study   | No assessed | Fragility or functional decline | –                                                  | –                           | –     | 8    | –     | Balanced |
| <b>A. de Vos, 2017</b>          | Netherlands                | Descriptive study   | No assessed | Fragility or functional decline | –                                                  | –                           | –     | –    | –     | –        |
| <b>N. Cecins, 2017</b>          | Australia                  | Observational Study | Effective   | Single health condition         | COPD                                               | Respiratory                 | –     | 251  | 72    | Balanced |
| <b>N. Bleijenberg, 2017</b>     | Netherlands<br>Switzerland | Intervention study  | Effective   | Fragility or functional decline | –                                                  | –                           | Other | 1791 | 85.05 | Female   |
| <b>R. N. Barker, 2017</b>       | Australia                  | Observational Study | Effective   | Fragility or functional decline | –                                                  | –                           | Other | 206  | 61    | Balanced |
| <b>J. J. Kraal, 2017</b>        | Netherlands                | Intervention study  | Effective   | Single health condition         | Cardiovascular disease not specified               | Cardiovascular              | –     | 90   | 59.1  | Male     |

|                                                               |             |                     |               |                                 |                                                    |                     |       |     |       |          |
|---------------------------------------------------------------|-------------|---------------------|---------------|---------------------------------|----------------------------------------------------|---------------------|-------|-----|-------|----------|
| <b>K. Brueggen, 2017</b>                                      | Germany     | Intervention study  | Effective     | Single health condition         | Cognitive impairment including dementia or aphasia | Neurological        | –     | 16  | 70    | –        |
| <b>J. Chen, 2017</b>                                          | China       | Intervention study  | Effective     | Single health condition         | Stroke                                             | Neurological        | < 85  | 54  | 66.3  | Male     |
| <b>M. A. Mas, 2017</b>                                        | Spain       | Intervention study  | Effective     | Fragility or functional decline | –                                                  | –                   | –     | 849 | 83.4  | Female   |
| <b>S. Santana, 2017</b>                                       | Portugal    | Intervention study  | Not effective | Single health condition         | Stroke                                             | Neurological        | < 85  | 190 | 62    | Balanced |
| <b>T. Ueda, 2017</b>                                          | Japan       | Intervention study  | Effective     | Fragility or functional decline | –                                                  | –                   | > 65  | 60  | 75.85 | Female   |
| <b>J. Hong, 2017</b>                                          | Korea       | Intervention study  | Effective     | Fragility or functional decline | –                                                  | –                   | > 65  | 23  | 81.85 | Balanced |
| <b>R. Hwang<br/>J. Bruning<br/>N. R. Morris<br/>A. , 2017</b> | Australia   | Intervention study  | Effective     | Single health condition         | Heart failure                                      | Cardiovascular      | >18   | 53  | 67    | Balanced |
| <b>A.-B. Zakrisson, 2016</b>                                  | Sweden      | Intervention study  | Not effective | Single health condition         | COPD                                               | Respiratory         | –     | 103 | 67.7  | Balanced |
| <b>K. Young-Mee, 2016</b>                                     | Korea       | Intervention study  | Effective     | Fragility or functional decline | –                                                  | –                   | > 65  | 20  | –     | –        |
| <b>A. Wolf, 2016</b>                                          | Sweden      | Intervention study  | Effective     | Single health condition         | Cardiovascular disease not specified               | Cardiovascular      | Other | 199 | 60    | Male     |
| <b>S. N. W. Vorrink, 2016</b>                                 | Netherlands | Intervention study  | Not effective | Single health condition         | COPD                                               | Respiratory         | Other | 157 | 62.5  | Balanced |
| <b>M. van den Berg, 2016</b>                                  | Australia   | Intervention study  | No assessed   | Single health condition         | Stroke                                             | Neurological        | –     | 63  | 67.3  | Male     |
| <b>M. Y. Tseng, 2016</b>                                      | China       | Intervention study  | Effective     | Single health condition         | Hip fracture or post hip arthroplasty              | Musculoskeletal     | > 60  | 153 | 77.99 | Female   |
| <b>M.-Y. Tseng, 2016</b>                                      | China       | Intervention study  | Effective     | Single health condition         | Hip fracture or post hip arthroplasty              | Musculoskeletal     | > 60  | 281 | 76.36 | Female   |
| <b>F. J. Tarazona-Santabalbina, 2016</b>                      | Spain       | Intervention study  | Effective     | Fragility or functional decline | –                                                  | –                   | > 70  | 100 | 80    | Balanced |
| <b>M. Smaerup, 2016</b>                                       | Denmark     | Intervention study  | Not effective | Single health condition         | Vestibular dysfunction                             | Sensory impairments | > 65  | 57  | 77.6  | Balanced |
| <b>S. Shinkai, 2016</b>                                       | Japan       | Observational Study | Effective     | Fragility or functional decline | –                                                  | –                   | > 65  | –   | –     | –        |
| <b>F. G. H. Ruikes, 2016</b>                                  | Netherlands | Intervention study  | Not effective | Fragility or functional decline | –                                                  | –                   | > 70  | 536 | 81.8  | Female   |



|                             |                          |                     |               |                                 |                                            |                             |       |     |       |          |
|-----------------------------|--------------------------|---------------------|---------------|---------------------------------|--------------------------------------------|-----------------------------|-------|-----|-------|----------|
| <b>D. Rosen, 2016</b>       | United States of America | Intervention study  | Effective     | Single health condition         | Heart failure                              | Cardiovascular              | Other | 45  | 60    | Female   |
| <b>F. C. Pannill, 2016</b>  | Netherlands              | Intervention study  | Not effective | Fragility or functional decline | –                                          | –                           | > 65  | 674 | 80    | Balanced |
| <b>M. J. Meunier, 2016</b>  | United States of America | Descriptive study   | Effective     | Fragility or functional decline | –                                          | –                           | Other | 34  | 79    | Balanced |
| <b>R. J. McNamara, 2016</b> | Australia                | Intervention study  | Effective     | Single health condition         | COPD, cardiovascular disease not specified | Cardiovascular, respiratory | –     | 32  | 72    | Male     |
| <b>A. McCluskey, 2016</b>   | Australia                | Intervention study  | Not effective | Single health condition         | Stroke                                     | Neurological                | >18   | 263 | 67    | Balanced |
| <b>M. À. Mas, 2016</b>      | Spain                    | Observational Study | Effective     | Fragility or functional decline | –                                          | –                           | > 65  | 270 | 83.5  | Female   |
| <b>D. L. Marsden, 2016</b>  | Australia                | Intervention study  | Effective     | Single health condition         | Stroke                                     | Neurological                | >18   | 20  | 58.2  | Female   |
| <b>R. López-Liria, 2016</b> | Spain                    | Observational Study | Effective     | Single health condition         | Stroke                                     | Neurological                | –     | 145 | 69.25 | Balanced |
| <b>W. M. Looman, 2016</b>   | Netherlands              | Intervention study  | Not effective | Fragility or functional decline | –                                          | –                           | –     | 184 | 82    | Female   |
| <b>W. M. Looman, 2016</b>   | Netherlands              | Intervention study  | Effective     | Fragility or functional decline | –                                          | –                           | > 75  | 377 | 82.05 | Female   |
| <b>C. Littlewood, 2016</b>  | United Kingdom           | Intervention study  | No assessed   | Single health condition         | Rotator cuff tendinopathy                  | Musculoskeletal             | >18   | 86  | 54.7  | Balanced |
| <b>Y.-Y. Leung, 2016</b>    | China (Hong Kong)        | Intervention study  | Effective     | Single health condition         | Inflammatory arthritis                     | Musculoskeletal             | >18   | 99  | 51.9  | Female   |
| <b>G. Leung, 2016</b>       | Canada                   | Intervention study  | Effective     | Fragility or functional decline | –                                          | –                           | > 60  | 104 | 81.6  | Female   |
| <b>D. S. Kushner, 2016</b>  | United States of America | Intervention study  | Effective     | Single health condition         | Stroke                                     | Neurological                | > 75  | 58  | 82.9  | Balanced |
| <b>A. Kono, 2016</b>        | Japan                    | Intervention study  | Effective     | Fragility or functional decline | –                                          | –                           | > 65  | 360 | 79.2  | Female   |
| <b>E. Kjerstad, 2016</b>    | Norway                   | Intervention study  | Effective     | Fragility or functional decline | –                                          | –                           | >18   | 46  | 79    | Female   |
| <b>A. Karlsson, 2016</b>    | Sweden                   | Intervention study  | Effective     | Single health condition         | Hip fracture or post hip arthroplasty      | Musculoskeletal             | > 70  | 205 | 82.9  | Female   |
| <b>F. Jones, 2016</b>       | United Kingdom           | Intervention study  | Effective     | Single health condition         | Stroke                                     | Neurological                | –     | 78  | 65.25 | Balanced |
| <b>K. Huson, 2016</b>       | Canada                   | Intervention study  | Effective     | Fragility or functional decline | –                                          | –                           | > 70  | 100 | 82.7  | Balanced |

|                                   |                          |                     |               |                                 |                                                    |                     |       |      |       |          |
|-----------------------------------|--------------------------|---------------------|---------------|---------------------------------|----------------------------------------------------|---------------------|-------|------|-------|----------|
| <b>C. Graven, 2016</b>            | Australia                | Intervention study  | Effective     | Single health condition         | Stroke                                             | Neurological        | _     | 110  | 69.9  | Balanced |
| <b>K.-J. Franke, 2016</b>         | Germany                  | Intervention study  | Effective     | Single health condition         | COPD                                               | Respiratory         | _     | 44   | 63.3  | Balanced |
| <b>H. L. Cameron-Tucker, 2016</b> | Australia                | Intervention study  | Not effective | Single health condition         | COPD                                               | Respiratory         | >18   | 65   | 69    | Balanced |
| <b>S. Calugi, 2016</b>            | Italy                    | Intervention study  | Effective     | Single health condition         | Stroke                                             | Respiratory         | >18   | 229  | 70.95 | Male     |
| <b>B. M. Buurman, 2016</b>        | Netherlands              | Intervention study  | Not effective | Fragility or functional decline | _                                                  | _                   | > 65  | 674  | 79.85 | Balanced |
| <b>J. Blom, 2016</b>              | Netherlands              | Intervention study  | Effective     | Fragility or functional decline | _                                                  | _                   | > 75  | 358  | 80    | Balanced |
| <b>N. Bleijenberg, 2016</b>       | Netherlands              | Intervention study  | Effective     | Fragility or functional decline | _                                                  | _                   | > 60  | 3092 | 74    | Balanced |
| <b>S. Knecht, 2016</b>            | Germany                  | Observational Study | Effective     | Single health condition         | Stroke                                             | Neurological        | _     | 2294 | _     | _        |
| <b>P. De Vriendt, 2016</b>        | Belgium                  | Intervention study  | Effective     | Fragility or functional decline | _                                                  | _                   | > 65  | 168  | 80.4  | Female   |
| <b>R. S. Rasmussen, 2016</b>      | Denmark                  | Intervention study  | Effective     | Single health condition         | Stroke                                             | Neurological        | >18   | 71   | 78.5  | Balanced |
| <b>G. Lewin, 2016</b>             | Australia                | Descriptive study   | Effective     | Fragility or functional decline | _                                                  | _                   | _     | 58   | 76.8  | Female   |
| <b>A. M. Meyer, 2016</b>          | United States of America | Intervention study  | Effective     | Single health condition         | Cognitive impairment including dementia or aphasia | Neurological        | Other | 17   | 67.6  | Balanced |
| <b>A. Y. Zhang, 2015</b>          | United States of America | Intervention study  | Effective     | Single health condition         | Prostate cancer                                    | Cancer              | _     | 244  | 65.3  | Male     |
| <b>F. K. Y. Wong, 2015</b>        | China                    | Intervention study  | Effective     | Single health condition         | Stroke                                             | Neurological        | _     | 108  | 69.5  | Female   |
| <b>A. van Dijk-de Vries, 2015</b> | Netherlands              | Intervention study  | Not effective | Single health condition         | Diabetes                                           | Metabolic           | _     | 264  | 64.5  | Balanced |
| <b>S. van der Weegen, 2015</b>    | Netherlands              | Intervention study  | Effective     | Single health condition         | COPD                                               | Respiratory         | < 70  | 199  | 57.8  | Balanced |
| <b>H. P. A. van der Aa, 2015</b>  | Netherlands and Belgium  | Intervention study  | Effective     | Single health condition         | Vision impairment                                  | Sensory impairments | > 50  | 265  | 73.6  | Female   |
| <b>H. Umopathy, 2015</b>          | Australia                | Intervention study  | Not effective | Single health condition         | Osteoarthritis                                     | Musculoskeletal     | _     | 195  | 60.7  | Female   |
| <b>A. E. Scharlach, 2015</b>      | United States of America | Observational Study | Effective     | Fragility or functional decline | _                                                  | _                   | > 60  | 96   | 76    | Female   |

|                              |                          |                     |               |                                 |                                       |                 |       |      |       |          |
|------------------------------|--------------------------|---------------------|---------------|---------------------------------|---------------------------------------|-----------------|-------|------|-------|----------|
| <b>A. C. Pighills, 2015</b>  | Australia                | Intervention study  | Not effective | Fragility or functional decline | –                                     | –               | > 65  | 153  | 75.6  | Balanced |
| <b>J. D. Piette, 2015</b>    | United States of America | Intervention study  | Effective     | Single health condition         | Heart failure                         | Cardiovascular  | –     | 331  | 67.85 | Male     |
| <b>R. Pérez-Cuevas, 2015</b> | Mexico                   | Intervention study  | Effective     | Fragility or functional decline | –                                     | –               | > 65  | 239  | 77    | Female   |
| <b>S. M. Mosleh, 2015</b>    | Scotland                 | Observational Study | Effective     | Single health condition         | Cardiovascular disease not specified  | Cardiovascular  | –     | 305  | 61.1  | Male     |
| <b>R. J. Mays, 2015</b>      | United States of America | Intervention study  | Not effective | Single health condition         | Peripheral artery disease             | Cardiovascular  | Other | 20   | 65.35 | Female   |
| <b>R. Maddison, 2015</b>     | New Zealand              | Intervention study  | Not effective | Single health condition         | Cardiovascular disease not specified  | Cardiovascular  | –     | 171  | 60.2  | Male     |
| <b>P. Lou, 2015</b>          | China                    | Intervention study  | Effective     | Single health condition         | COPD                                  | Respiratory     | –     | 8217 | 61.5  | Balanced |
| <b>S. A. Lear, 2015</b>      | Canada                   | Intervention study  | Effective     | Single health condition         | Cardiovascular disease not specified  | Cardiovascular  | –     | 78   | 60.05 | Female   |
| <b>D. S. Kushner, 2015</b>   | United States of America | Intervention study  | Effective     | Fragility or functional decline | –                                     | –               | > 75  | 524  | 83.15 | Female   |
| <b>L. Kidd, 2015</b>         | United Kingdom           | Intervention study  | Effective     | Single health condition         | Stroke                                | Neurological    | –     | 26   | 64    | Balanced |
| <b>J. Garvey, 2015</b>       | Ireland                  | Intervention study  | Effective     | Multimorbidity                  | –                                     | –               | >18   | 50   | 66.25 | Female   |
| <b>A. Forster, 2015</b>      | United Kingdom           | Intervention study  | Not effective | Single health condition         | Stroke                                | Neurological    | –     | 800  | 71.7  | Balanced |
| <b>M. P. Foley, 2015</b>     | United States of America | Intervention study  | Effective     | Single health condition         | Cancer not specified                  | Cancer          | >18   | 59   | 59    | Female   |
| <b>C. Ekelund, 2015</b>      | Sweden                   | Intervention study  | Effective     | Fragility or functional decline | –                                     | –               | > 65  | 158  | –     | Balanced |
| <b>J. Edgren, 2015</b>       | Finland                  | Intervention study  | Effective     | Single health condition         | Hip fracture or post hip arthroplasty | Musculoskeletal | > 60  | 81   | 80    | Female   |
| <b>N. Cuperus, 2015</b>      | Netherlands              | Intervention study  | Not effective | Single health condition         | Osteoarthritis                        | Musculoskeletal | –     | 147  | 58.5  | Female   |
| <b>P. Coventry, 2015</b>     | United Kingdom           | Intervention study  | Effective     | Multimorbidity                  | –                                     | –               | –     | 387  | 58.5  | Male     |
| <b>R. A. Clark, 2015</b>     | Australia                | Intervention study  | Effective     | Single health condition         | Heart failure                         | Cardiovascular  | >18   | 5    | 61.6  | –        |
| <b>A. K. Chang, 2015</b>     | Korea                    | Intervention study  | Effective     | Single health condition         | Stroke                                | Neurological    | > 60  | 38   | 67.95 | Balanced |

|                                                              |                          |                    |               |                                 |                                      |                |      |     |      |          |
|--------------------------------------------------------------|--------------------------|--------------------|---------------|---------------------------------|--------------------------------------|----------------|------|-----|------|----------|
| <b>D. B. Bekelman, 2015</b>                                  | United States of America | Intervention study | Not effective | Single health condition         | Heart failure                        | Cardiovascular | _    | 384 | 67.6 | Male     |
| <b>I. Frederix<br/>D. Hansen<br/>K. Coninx<br/>P. , 2015</b> | Belgium                  | Intervention study | Effective     | Single health condition         | Cardiovascular disease not specified | Cardiovascular | _    | 140 | 61   | Balanced |
| <b>S. McKenna, 2015</b>                                      | Australia                | Intervention study | No assessed   | Single health condition         | Stroke                               | Neurological   | _    | 24  | 64.7 | Balanced |
| <b>J. D. , 2015</b>                                          | India                    | Intervention study | Effective     | Single health condition         | Stroke                               | Neurological   | >18  | 104 | 60   | Balanced |
| <b>E. Piotrowicz, 2015</b>                                   | Poland                   | Intervention study | Effective     | Single health condition         | Heart failure                        | Cardiovascular | _    | 131 | 56.4 | Male     |
| <b>H. Tunt, 2015</b>                                         | Norway                   | Intervention study | Effective     | Fragility or functional decline | _                                    | _              | >18  | 61  | 79   | Female   |
| <b>N. S. Tielemans, 2015</b>                                 | Netherlands              | Intervention study | Not effective | Single health condition         | Stroke                               | Neurological   | >18  | 113 | 57   | Balanced |
| <b>A. Winkel, 2015</b>                                       | Denmark                  | Intervention study | Effective     | Fragility or functional decline | _                                    | _              | > 65 | 91  | 79.6 | Female   |
| <b>T. Taule<br/>L. I. St, 2015</b>                           | Norway                   | Intervention study | Not effective | Single health condition         | Stroke                               | Neurological   | _    | 154 | 73   | Balanced |
| <b>D. N. Kiosses, 2015</b>                                   | United States of America | Intervention study | Effective     | Multimorbidity                  | _                                    | _              | _    | 74  | 67.6 | Female   |
| <b>S. F. Metzelthin, 2015</b>                                | Nethelerlands            | Intervention study | Not effective | Fragility or functional decline | _                                    | _              | > 70 | 346 | 77.2 | _        |

## Supplementary Material 5

**Supplementary Table 2. Rehabilitation programs' most important characteristics**

| First author, year               | Level of care           | Mode of service delivery    | Interventions for rehabilitation                                                                                                                                                                                                                                                                                                                                                                               | Providers                                      | Health workers                                                                                          | Multidisciplinary rehabilitation |
|----------------------------------|-------------------------|-----------------------------|----------------------------------------------------------------------------------------------------------------------------------------------------------------------------------------------------------------------------------------------------------------------------------------------------------------------------------------------------------------------------------------------------------------|------------------------------------------------|---------------------------------------------------------------------------------------------------------|----------------------------------|
| <b>Diaz Baquero, A. A., 2022</b> | Specialized health care | Inpatient, outpatient       | Cognitive training                                                                                                                                                                                                                                                                                                                                                                                             | Health workers                                 | Psychologist, therapist not specified                                                                   | No                               |
| <b>Liang, C. C., 2022</b>        | Primary health care     | Community                   | Social care and support, education and advice on self-care, home visits, therapeutic exercises, therapeutic recreation                                                                                                                                                                                                                                                                                         | Peers and volunteers                           | –                                                                                                       | No                               |
| <b>Porta, F. L., 2022</b>        | Specialized health care | Outpatient, home            | Therapeutic exercises, home visits, assessment of risk for falls, assessment of person-centred goals and priorities for health care, education and advice on self-care, multicomponent care and or rehabilitation programme, assessment of polypharmacy                                                                                                                                                        | Health workers                                 | Physical therapist, geriatrician, PRM physicians, other physicians                                      | Yes                              |
| <b>Yee, D. K. H., 2022</b>       | Specialized health care | Inpatient                   | Discharge planning, rehabilitation coordination and management, multicomponent care and or rehabilitation programme                                                                                                                                                                                                                                                                                            | Health workers                                 | Other physicians, geriatrician, PRM physicians                                                          | Yes                              |
| <b>Poulsen, L. K., 2022</b>      | Specialized health care | Inpatient, community, home  | Rehabilitation coordination and management, multicomponent care and or rehabilitation programme, home visits, therapeutic exercise, follow up visits, assessment of person-centred goals and priorities for health care, education and advice on self-care, discharge planning, occupational therapy                                                                                                           | Health workers                                 | Physical therapist, occupational therapist                                                              | No                               |
| <b>Stathi, A., 2022</b>          | Primary health care     | Community                   | Therapeutic exercise, therapeutic recreation, education and advice on self-care, education to influence lifestyle behaviours, behavioural interventions                                                                                                                                                                                                                                                        | Health workers                                 | Exercise professionals                                                                                  | No                               |
| <b>Tekin, F., 2022</b>           | Primary health care     | Home                        | Therapeutic exercise, assessment of risk for falls, assessment of functioning                                                                                                                                                                                                                                                                                                                                  | Health workers                                 | Physical therapist                                                                                      | No                               |
| <b>Hoedemakers, M., 2022</b>     | Multiple levels of care | Home, community, outpatient | Comprehensive geriatric assessment, case management, assessment of person-centred goals and priorities for health care, assessment of functioning, multicomponent care and or rehabilitation programme, therapeutic exercise, occupational therapy                                                                                                                                                             | Health workers, informal caregivers and family | Nurse, social workers, physical therapist, occupational therapist, geriatricians                        | Yes                              |
| <b>Ropke, A., 2022</b>           | Multiple levels of care | Inpatient, home, community  | Assessment of functioning, follow up visits, therapeutic exercise, assessment of person-centred goals and priorities for health care, occupational therapy                                                                                                                                                                                                                                                     | Health workers                                 | Occupational therapist, physical therapist                                                              | No                               |
| <b>Bennell, K. L., 2022</b>      | Specialized health care | Home                        | Counselling for weight management, assessment of person-centred goals and priorities for health care, therapeutic exercise, education about nutrition, behavioural interventions                                                                                                                                                                                                                               | Health workers                                 | Physical therapist, dieticians                                                                          | No                               |
| <b>Chong, E., 2022</b>           | Specialized health care | Inpatient, home             | Comprehensive geriatric assessment, discharge planning, education and advice on self-care, follow-up visits, caregiver's education and training                                                                                                                                                                                                                                                                | Health workers                                 | General practitioner, physical therapist, pharmacist, nurse                                             | Yes                              |
| <b>Kam Yuet Wong, F., 2022</b>   | Multiple levels of care | Inpatient, home             | Case management, discharge planning, follow up visits, home visits, health status monitoring, rehabilitation coordination and management, education and advice on self-care, caregiver's education and training, assessment of functioning, assessment of person-centred goals and priorities for health care, problem solving skills training, training for activities of daily living, therapeutic exercises | Health workers                                 | Physical therapist, occupational therapist, speech and language therapists, neurologist, PRM physicians | Yes                              |
| <b>Love, 2022</b>                | Specialized health care | Home                        | Follow up visits, home visits, training for activities of daily living, therapeutic exercises, assessment of person-centred goals and priorities for health care, occupational therapy, rehabilitation coordination and management, environmental                                                                                                                                                              | Health workers                                 | Other physicians, physical therapist, occupational therapist, social workers,                           | Yes                              |

|                                |                         |                                      |                                                                                                                                                                                                                                                                                                                                                                 |                                                |                                                                          |     |
|--------------------------------|-------------------------|--------------------------------------|-----------------------------------------------------------------------------------------------------------------------------------------------------------------------------------------------------------------------------------------------------------------------------------------------------------------------------------------------------------------|------------------------------------------------|--------------------------------------------------------------------------|-----|
|                                |                         |                                      | adaptations, provision and training in the use of assistive products, social care and support                                                                                                                                                                                                                                                                   |                                                | dieticians, speech and language therapist                                |     |
| <b>Kalav, S., 2022</b>         | Specialized health care | Inpatient, home, outpatient          | Discharge planning, education on self-care, follow up visits, health status monitoring,                                                                                                                                                                                                                                                                         | Health workers, the patient                    | Nurse, multidisciplinary team not specified                              | Yes |
| <b>Ullrich, P., 2022</b>       | Primary health care     | Home                                 | Education and advice on self-care, education about physical activity and exercise, motivational interventions, therapeutic exercise, training for activities of daily living, assessment of environment, assessment of functioning, home visits                                                                                                                 | Health workers                                 | Exercise professionals                                                   | No  |
| <b>Mora-Traverso, M., 2022</b> | Specialized health care | Telerehabilitation                   | Multicomponent care and or rehabilitation programme, education on self-care care, caregivers' education and training, occupational therapy, therapeutic exercise                                                                                                                                                                                                | Health workers                                 | Physical therapist, occupational therapist                               | No  |
| <b>Gustavson, A. M., 2022</b>  | Multiple levels of care | Eldercare institution, home          | Therapeutic exercise, education about physical activity and exercise, assessment of person-centred goals and priorities for health care, functioning monitoring                                                                                                                                                                                                 | Health workers                                 | Physical therapist, physical therapist assistants                        | No  |
| <b>Tao, G., 2022</b>           | Specialized health care | Outpatient, telerehabilitation       | Therapeutic exercise, functioning assessment, peer support or peer support group, motivational interventions                                                                                                                                                                                                                                                    | Health workers, peers and volunteers           | Trainers not specified                                                   | No  |
| <b>Yang, L., 2022</b>          | Specialized health care | Eldercare institution                | Education and advice on self-care, cognitive training, caregivers' education and training, assessment of person-centred goals and priorities for health care, multicomponent care and or rehabilitation programme, coordination of care and management of care processes, training for activities of daily living, therapeutic exercise, therapeutic recreation | Health workers, informal caregivers and family | Neurologist, nurse, therapist not specified, social workers              | Yes |
| <b>Furuta, K., 2022</b>        | Primary health care     | Community                            | Education and advice on self-care, assessment of person-centred goals and priorities for health care, therapeutic exercise, education about physical activity and exercise, education to influence lifestyle behaviours                                                                                                                                         | Health workers                                 | Occupational therapist, gerontologists                                   | No  |
| <b>Li, C. T., 2022</b>         | Specialized health care | Home, telerehabilitation, outpatient | Training for activities of daily living, therapeutic exercise, occupational therapy, home based assistance for people with functional limitations in activities of daily living, follow up visits, functioning monitoring, health status monitoring, assessment of person-centred goals and priorities for health care                                          | Health workers                                 | Occupational therapist, physicians not specified                         | No  |
| <b>Tan, J. Y., 2022</b>        | Specialized health care | Outpatient                           | Health status monitoring, multicomponent care and or rehabilitation programme, therapeutic exercise, case management, training for activities of daily living                                                                                                                                                                                                   | Health workers                                 | Geriatrician, other physicians, pharmacist, social workers               | Yes |
| <b>U. N. Yadav, 2021</b>       | Multiple levels of care | Outpatient                           | Education and counselling in self-management, motivational activities, case management                                                                                                                                                                                                                                                                          | The patient                                    | –                                                                        | –   |
| <b>S. Tanaka, 2021</b>         | Specialized health care | Eldercare institution                | Cognitive rehabilitation, therapeutic exercise                                                                                                                                                                                                                                                                                                                  | Health workers                                 | Physical therapist, occupational therapist                               | No  |
| <b>A. Sondell, 2021</b>        | Specialized health care | Outpatient, home                     | Comprehensive assessment of functioning, multicomponent rehabilitation programme, activities of daily living skills training, provision and training in the use of assistive products, social care and support plan, psychological interventions                                                                                                                | Health workers                                 | Occupational therapist, nurse, psychologist, social workers              | Yes |
| <b>W. Rietkerk, 2021</b>       | Specialized health care | Outpatient                           | Comprehensive geriatric assessment, assessment of person-centred goals and priorities for health care                                                                                                                                                                                                                                                           | Health workers                                 | General practitioner, nurse, social workers, geriatrician                | Yes |
| <b>M. E. Ribbink, 2021</b>     | Specialized health care | Inpatient                            | Comprehensive geriatric assessment, assessment of person-centred goals and priorities for health care, multicomponent rehabilitation programme, environmental modifications, rehabilitation coordination and management, discharge planning                                                                                                                     | Health workers                                 | Nurse, physical therapist, social workers, occupational therapist, other | Yes |
| <b>R. Quigley, 2021</b>        | Multiple levels of care | Outpatient, inpatient                | Comprehensive geriatric assessment, case management, rehabilitation coordination and management                                                                                                                                                                                                                                                                 | Health workers                                 | Geriatrician, nurse, general practitioner, nurse                         | Yes |

|                             |                         |                                |                                                                                                                                                                                                                    |                                                |                                                                        |     |
|-----------------------------|-------------------------|--------------------------------|--------------------------------------------------------------------------------------------------------------------------------------------------------------------------------------------------------------------|------------------------------------------------|------------------------------------------------------------------------|-----|
| <b>C. L. Peiris, 2021</b>   | Specialized health care | Home, outpatient               | Comprehensive assessment of functioning, therapeutic exercise, education and counselling on physical activity, education and counselling on weight loss, education and counselling on nutrition                    | Health workers                                 | Physical therapist, geriatrician, nurse, dieticians                    | Yes |
| <b>M. Morri, 2021</b>       | Multiple levels of care | Home, outpatient, inpatient    | Comprehensive assessment of functioning, multicomponent rehabilitation programme                                                                                                                                   | Health workers, informal caregivers and family | Physical therapist, nurse                                              | No  |
| <b>H. Kim, 2021</b>         | Primary health care     | Eldercare institution          | Assessment of frailty, comprehensive assessment of functioning, case management, assessment of person-centred goals and priorities for health care, caregivers' education and training                             | Health workers                                 | Nurse                                                                  | No  |
| <b>A. Flynn, 2021</b>       | Multiple levels of care | Outpatient, telerehabilitation | Therapeutic exercise, education and counselling in self-management, follow-up                                                                                                                                      | Health workers                                 | Physical therapist                                                     | No  |
| <b>R. De Luca, 2021</b>     | Specialized health care | Telerehabilitation             | Assessment of nutritional status, assessment of emotional functions, assessment of cognitive functions, case management, health status monitoring, social care and support plan, psychological interventions       | Health workers                                 | Nurse, social workers, psychologist, dieticians                        | Yes |
| <b>S. Coskun, 2021</b>      | Multiple levels of care | Outpatient, inpatient          | Assessment of health status, assessment of person-centred goals and priorities for health care, case management, multicomponent rehabilitation programme, discharge planning, follow-up                            | Health workers, informal caregivers and family | Nurse, other physicians, physical therapist, dieticians                | Yes |
| <b>Y. Baba, 2021</b>        | Primary health care     | Eldercare institution          | Therapeutic exercise, occupational therapy                                                                                                                                                                         | Health workers                                 | Other                                                                  | No  |
| <b>Coletta, A. M., 2021</b> | Specialized health care | Outpatient, telerehabilitation | Therapeutic exercise, assessment of person-centred goals and priorities for health care, assessment of exercise capacity                                                                                           | Health workers                                 | PRM physicians, exercise professionals                                 | No  |
| <b>Lamberti, N., 2021</b>   | Specialized health care | Outpatient, telerehabilitation | Assessment of exercise capacity, therapeutic exercise                                                                                                                                                              | –                                              | –                                                                      | –   |
| <b>Maniscalco, M., 2021</b> | Specialized health care | Outpatient                     | Education about nutrition, therapeutic exercise, psychological interventions                                                                                                                                       | Health workers                                 | Multidisciplinary team not specified                                   | Yes |
| <b>Otero, P., 2021</b>      | Primary health care     | Telerehabilitation             | Cognitive training, psychological interventions, education to influence lifestyle behaviours, therapeutic recreation                                                                                               | The patient                                    | –                                                                      | –   |
| <b>Tseng, M. Y., 2021</b>   | Multiple levels of care | Inpatient, home                | Comprehensive geriatric assessment, discharge planning, follow-up visits, caregivers' education and training, home visits, therapeutic exercise, assessment of person-centred goals and priorities for health care | Health workers                                 | Nurse                                                                  | No  |
| <b>Kim, S., 2021</b>        | Primary health care     | Community                      | Therapeutic exercise                                                                                                                                                                                               | Health workers                                 | Exercise professionals, community health worker                        | No  |
| <b>Sun, F. C., 2021</b>     | Primary health care     | Community                      | Therapeutic exercise, music therapy                                                                                                                                                                                | Health workers                                 | Physical therapist, music therapist                                    | No  |
| <b>Farinha, C., 2021</b>    | Primary health care     | Community                      | Therapeutic exercise                                                                                                                                                                                               | Health workers                                 | Exercise professionals                                                 | No  |
| <b>Hayden, M. C., 2021</b>  | Specialized health care | Inpatient                      | Therapeutic exercise, assessment of person-centred goals and priorities for health care, occupational therapy, health status monitoring, psychological interventions, education and advice on self-care            | Health workers                                 | Other physicians, social workers, psychologist, occupational therapist | Yes |
| <b>Barker, K. L., 2021</b>  | Primary health care     | Home                           | Assessment of functioning, assessment of person-centred goals and priorities for health care, therapeutic exercise, provision and training in the use of assistive products                                        | Health workers                                 | Physical therapist, physical therapist assistants                      | No  |

|                                     |                         |                                |                                                                                                                                                                                                                                                                                                                                                             |                             |                                                                                        |     |
|-------------------------------------|-------------------------|--------------------------------|-------------------------------------------------------------------------------------------------------------------------------------------------------------------------------------------------------------------------------------------------------------------------------------------------------------------------------------------------------------|-----------------------------|----------------------------------------------------------------------------------------|-----|
| <b>Meisingset, I., 2021</b>         | Primary health care     | Home, eldercare institution    | Therapeutic exercise, home visits, follow up visits, occupational therapy, assessment of functioning, assessment of person-centred goals and priorities for health care, social care and support                                                                                                                                                            | Health workers              | Physical therapist, occupational therapist, home care personnel                        | Yes |
| <b>Al Chikhanie, Y., 2021</b>       | Specialized health care | Outpatient                     | Therapeutic exercise, education and advice on self-care, psychological interventions, education about physical activity and exercise                                                                                                                                                                                                                        | –                           | –                                                                                      | –   |
| <b>Suikkanen, S., 2021</b>          | Primary health care     | Home                           | Therapeutic exercise, education about nutrition, education about physical activity and exercise                                                                                                                                                                                                                                                             | Health workers              | Physical therapist                                                                     | No  |
| <b>Brouwers, R. W. M., 2021</b>     | Specialized health care | Outpatient, telerehabilitation | Functioning monitoring, follow up visits, therapeutic exercise                                                                                                                                                                                                                                                                                              | Health workers              | Physical therapist                                                                     | No  |
| <b>Patel, N., 2021</b>              | Specialized health care | Inpatient                      | Multicomponent care and or rehabilitation programme, speech therapy, therapeutic exercise, swallowing therapy, occupational therapy, training for activities of daily living, cognitive training, psychological interventions, rehabilitation coordination and management, provision and training in the use of assistive products, pharmacological therapy | Health workers              | Occupational therapist, speech and language therapists, other physicians, psychologist | Yes |
| <b>Yi, D., 2021</b>                 | Primary health care     | Home, telerehabilitation       | Therapeutic exercise, assessment of risk for falls, environmental adaptations, home visits, follow up visits                                                                                                                                                                                                                                                | Health workers              | Physical therapist                                                                     | No  |
| <b>Chi, Y. C., 2021</b>             | Specialized health care | Telerehabilitation             | Education and advice on self-care, education about physical activity and exercise                                                                                                                                                                                                                                                                           | Health workers              | Physicians not specified, social workers, community workers, exercise professionals    | Yes |
| <b>Gutierrez-Espinoza, H., 2021</b> | Specialized health care | Outpatient                     | Thermal modalities, therapeutic exercises                                                                                                                                                                                                                                                                                                                   | Health workers              | Physical therapist                                                                     | No  |
| <b>Su, S. F., 2021</b>              | Specialized health care | Inpatient, outpatient          | Assessment of emotional functions, education and advice on self-care, motivational interventions, therapeutic exercise, discharge planning, follow up visits                                                                                                                                                                                                | Health workers, the patient | Nurse, other physicians                                                                | No  |
| <b>Hosteng, K. R., 2021</b>         | Primary health care     | Eldercare institution          | Education about physical activity and exercise, motivational interventions, functioning monitoring, education to influence lifestyle behaviours                                                                                                                                                                                                             | The patient                 | –                                                                                      | –   |
| <b>Chiu, E. C., 2021</b>            | Specialized health care | Home                           | Assessment of person-centred goals and priorities for health care, occupational therapy, training in activities of daily living                                                                                                                                                                                                                             | Health workers              | Occupational therapist                                                                 | No  |
| <b>Martinez-Velilla, N., 2021</b>   | Specialized health care | Inpatient                      | Discharge planning, therapeutic exercise, education about physical activity and exercise, training on activities of daily living, assessment of person-centred goals and priorities for health care                                                                                                                                                         | Health workers, the patient | Physical therapist                                                                     | No  |
| <b>Gutierrez-Lopez, L., 2021</b>    | Specialized health care | Eldercare institution          | Assessment of health status, assessment of functioning, assessment of exercise capacity, therapeutic exercise                                                                                                                                                                                                                                               | –                           | –                                                                                      | –   |
| <b>Sen, E. I., 2021</b>             | Primary health care     | Home                           | Therapeutic exercise                                                                                                                                                                                                                                                                                                                                        | –                           | –                                                                                      | –   |
| <b>Sok, S., 2021</b>                | Primary health care     | Community                      | Motivational interventions, therapeutic exercise, cognitive training                                                                                                                                                                                                                                                                                        | Health workers              | Nurse                                                                                  | No  |
| <b>Jungreitmayr, S., 2021</b>       | Primary health care     | Telerehabilitation             | Therapeutic exercise                                                                                                                                                                                                                                                                                                                                        | The patient                 | –                                                                                      | –   |
| <b>Liang, C. K., 2021</b>           | Primary health care     | Community                      | Therapeutic exercise, education about nutrition, cognitive training, education and advice on self-care                                                                                                                                                                                                                                                      | –                           | –                                                                                      | –   |



|                                         |                         |                                           |                                                                                                                                                                                                                                                                                                                                                                              |                                      |                                                                     |     |
|-----------------------------------------|-------------------------|-------------------------------------------|------------------------------------------------------------------------------------------------------------------------------------------------------------------------------------------------------------------------------------------------------------------------------------------------------------------------------------------------------------------------------|--------------------------------------|---------------------------------------------------------------------|-----|
| <b>Oh, S. L., 2021</b>                  | Primary health care     | Home, outpatient                          | Therapeutic exercises, education and advice on self-care, education to influence lifestyle behaviours, education about nutrition, counselling for weight management                                                                                                                                                                                                          | Health workers, the patient          | Exercise professionals, physicians not specified, dieticians, nurse | Yes |
| <b>Pakrad, F., 2021</b>                 | Specialized health care | Telerehabilitation, outpatient            | Therapeutic exercise, education and advice on self-care, education to influence lifestyle behaviours, follow up visits, health status monitoring, assessment of person-centred goals and priorities for health care                                                                                                                                                          | Health workers, the patient          | –                                                                   | –   |
| <b>Siercke, M., 2021</b>                | Specialized health care | Community                                 | Therapeutic exercises, education and advice on self-care, education to influence lifestyle behaviours, motivational interventions, follow up visits, functioning monitoring, education about nutrition, caregivers' education and training, assessment of person-centred goals and priorities for health care                                                                | Health workers                       | Physical therapist, nurse, dieticians                               | Yes |
| <b>Tou, N. X., 2021</b>                 | Primary health care     | Community                                 | Therapeutic exercise                                                                                                                                                                                                                                                                                                                                                         | Health workers                       | Exercise professionals                                              | No  |
| <b>Monteblanco Cavalcante, M., 2021</b> | Specialized health care | Eldercare institution                     | Therapeutic exercise, cognitive training                                                                                                                                                                                                                                                                                                                                     | Health workers                       | Physical therapist                                                  | No  |
| <b>Borges-Machado, F., 2021</b>         | Primary health care     | Outpatient                                | Therapeutic exercise                                                                                                                                                                                                                                                                                                                                                         | Health workers                       | Exercise professionals                                              | No  |
| <b>Murphy, S. L., 2021</b>              | Specialized health care | Outpatient, telerehabilitation            | Thermal modalities, manual therapy, therapeutic exercises, occupational therapy                                                                                                                                                                                                                                                                                              | Health workers                       | Occupational therapist                                              | No  |
| <b>Bruce, J., 2021</b>                  | Specialized health care | Outpatient                                | Education about physical activity and exercise, therapeutic exercise, education and advice on self-care                                                                                                                                                                                                                                                                      | Health workers                       | Physical therapist                                                  | No  |
| <b>Rosado, H., 2021</b>                 | Specialized health care | Outpatient                                | Therapeutic exercise, cognitive training                                                                                                                                                                                                                                                                                                                                     | Health workers                       | Rehabilitation scientist                                            | No  |
| <b>Tian, R., 2021</b>                   | Specialized health care | Outpatient                                | Social care and support, cognitive training, training for activities of daily living, emotional support, language therapy, education and advice on self-care                                                                                                                                                                                                                 | Health workers                       | Physicians not specified, nurses                                    | No  |
| <b>Noh, E. Y., 2021</b>                 | Multiple levels of care | Home, community, outpatient               | Home based assistance for people with functional limitations in activities of daily living, case management, emotional support, cognitive training, education and advice on self-care, medication review dose adjustment cessation and or modification, environmental adaptations, therapeutic recreation, assessment of person-centred goals and priorities for health care | Health workers, peers and volunteers | Social workers, nurse, physicians not specified                     | Yes |
| <b>Aguilera-Godoy, A., 2021</b>         | Specialized health care | Outpatient                                | Therapeutic exercise, thermal modalities, manual therapy, provision and training in the use of assistive products                                                                                                                                                                                                                                                            | Health workers                       | Physical therapist                                                  | No  |
| <b>Mentz, R. J., 2021</b>               | Specialized health care | Inpatient, outpatient, telerehabilitation | Assessment of person-centred goals and priorities for health care, discharge planning, therapeutic exercises, assessment of environment, follow up visits                                                                                                                                                                                                                    | Health workers                       | –                                                                   | –   |
| <b>Pepera, G., 2021</b>                 | Primary health care     | Eldercare institution                     | Therapeutic exercise                                                                                                                                                                                                                                                                                                                                                         | Health workers                       | Physical therapist                                                  | No  |
| <b>Rince, G., 2021</b>                  | Specialized health care | Outpatient                                | Therapeutic exercise, assessment of risk for falls, training for activities of daily living, assessment of person-centred goals and priorities for health care                                                                                                                                                                                                               | Health workers                       | Physical therapist                                                  | No  |
| <b>Arena, S. K., 2021</b>               | Primary health care     | Community, telerehabilitation             | Therapeutic exercise, assessment of risk for falls, motivational interventions, education to influence lifestyle behaviours, environmental adaptations, assessment of environment, functioning monitoring                                                                                                                                                                    | Health workers                       | Physical therapist                                                  | No  |
| <b>Scherrenberg, M., 2021</b>           | Specialized health care | Outpatient, telerehabilitation            | Motivational interventions, therapeutic exercise, functioning monitoring, education about physical activity and exercise, follow up visits                                                                                                                                                                                                                                   | The patient                          | –                                                                   | –   |

|                              |                         |                                |                                                                                                                                                                                                                      |                                                |                                                                                |     |
|------------------------------|-------------------------|--------------------------------|----------------------------------------------------------------------------------------------------------------------------------------------------------------------------------------------------------------------|------------------------------------------------|--------------------------------------------------------------------------------|-----|
| <b>Mao, H. F., 2021</b>      | Primary health care     | Community                      | Therapeutic exercise, cognitive training, training in activities of daily living, motivational interventions, therapeutic recreation, assessment of person-centred goals and priorities for health care              | Health workers                                 | Occupational therapist                                                         | No  |
| <b>Rafiq, M. T., 2021</b>    | Specialized health care | Outpatient                     | Therapeutic exercise, motivational interventions, follow up visits                                                                                                                                                   | –                                              | –                                                                              | –   |
| <b>Bagkur, M., 2021</b>      | Primary health care     | Telerehabilitation             | Therapeutic exercise                                                                                                                                                                                                 | Health workers                                 | Physical therapist                                                             | No  |
| <b>Backer, H. C., 2021</b>   | Specialized health care | Outpatient, telerehabilitation | Therapeutic exercise, manual therapy, functioning monitoring                                                                                                                                                         | Health workers, the patient                    | Physical therapist                                                             | No  |
| <b>Katri Maria, T., 2021</b> | Specialized health care | Telerehabilitation, home       | Multicomponent care and or rehabilitation programme, therapeutic exercise, home visits, follow up visits, behavioural interventions, assessment of person-centred goals and priorities for health care               | Health workers                                 | Physical therapist                                                             | No  |
| <b>Ozen, S., 2021</b>        | Specialized health care | Outpatient                     | Therapeutic exercise, therapeutic recreation, training for activities of daily living, occupational therapy                                                                                                          | Health workers                                 | Physical therapist, occupational therapist                                     | No  |
| <b>Soukkio, P. K., 2021</b>  | Specialized health care | Home                           | Therapeutic exercise, training for activities of daily living, assessment of person-centred goals and priorities for health care, education about physical activity and exercise, education about nutrition          | Health workers                                 | Physical therapist, occupational therapist                                     | No  |
| <b>Woo, J., 2021</b>         | Primary health care     | Outpatient, community          | Therapeutic exercise, assessment of risk for falls, training for activities of daily living, assessment of person-centred goals and priorities for health care, cognitive training, social care and support plan     | Health workers                                 | Nurse, physical therapist, dieticians, optometrist                             | Yes |
| <b>Lim, J. H., 2021</b>      | Specialized health care | Home                           | Therapeutic exercise, home visits                                                                                                                                                                                    | Health workers                                 | Physical therapist                                                             | No  |
| <b>Song, C. Y., 2021</b>     | Specialized health care | Outpatient                     | Therapeutic exercise, cognitive training, education and advice on self-care, assessment of person-centred goals and priorities for health care                                                                       | Health workers                                 | Physical therapist, occupational therapist                                     | No  |
| <b>Z. Wu, 2020</b>           | Specialized health care | Telerehabilitation             | Multicomponent rehabilitation programme, assessment of person-centred goals and priorities for health care, caregivers' education and training                                                                       | Health workers, informal caregivers and family | Other physicians, nurse, physical therapist                                    | Yes |
| <b>J. Uddin, 2020</b>        | Primary health care     | Outpatient, home monitoring    | Therapeutic exercise, education and counselling on self-management, health status monitoring                                                                                                                         | Health workers                                 | Physical therapist                                                             | No  |
| <b>K. A. Spencer, 2020</b>   | Specialized health care | Outpatient                     | Assessment of person-centred goals and priorities for health care, assessment of cognitive functions, provision and training in the use of assistive products                                                        | –                                              | –                                                                              | –   |
| <b>Y. Song, 2020</b>         | Specialized health care | Telerehabilitation             | Assessment of exercise capacity, therapeutic exercise                                                                                                                                                                | Health workers                                 | Other physicians                                                               | No  |
| <b>H. N. Smith, 2020</b>     | Multiple levels of care | Eldercare institution, home    | Discharge planning, case management, multicomponent rehabilitation programme, provision and training in the use of assistive products, environmental modifications, education and counselling on self-management     | Health workers                                 | Nurse, social workers, psychologist, speech and language therapist, dieticians | Yes |
| <b>J. Sedlock, 2020</b>      | Specialized health care | Inpatient                      | Multicomponent rehabilitation programme, discharge planning, therapeutic exercise, occupational therapy                                                                                                              | Health workers                                 | Nurse, physical therapist, occupational therapist, dieticians                  | Yes |
| <b>J. Room, 2020</b>         | Specialized health care | Home                           | Multicomponent rehabilitation programme, assessment of environment, provision and training in the use of assistive products                                                                                          | Health workers                                 | Occupational therapist, physical therapist                                     | No  |
| <b>V. Provencher, 2020</b>   | Multiple levels of care | Inpatient, home                | Comprehensive assessment of functioning, assessment of person-centred goals and priorities for health care, discharge planning, assessment of environment, health status monitoring, provision of assistive products | Health workers                                 | Occupational therapist                                                         | No  |

|                              |                         |                                |                                                                                                                                                                                                                                                                                                                                                        |                             |                                                                                            |     |
|------------------------------|-------------------------|--------------------------------|--------------------------------------------------------------------------------------------------------------------------------------------------------------------------------------------------------------------------------------------------------------------------------------------------------------------------------------------------------|-----------------------------|--------------------------------------------------------------------------------------------|-----|
| <b>M. Parsons, 2020</b>      | Specialized health care | Inpatient                      | Comprehensive assessment of functioning, assessment of person-centred goals and priorities for health care, multicomponent rehabilitation programme, rehabilitation coordination and management, case management                                                                                                                                       | Health workers              | Nurse, physical therapist, occupational therapist, other                                   | Yes |
| <b>A. Nakayama, 2020</b>     | Specialized health care | Telerehabilitation             | Education and counselling in self-management, therapeutic exercise, health status monitoring                                                                                                                                                                                                                                                           | Health workers              | Other physicians, nurse                                                                    | No  |
| <b>I. Nabutovsky, 2020</b>   | Specialized health care | Telerehabilitation             | Assessment of health status, assessment of nutritional status, assessment of exercise capacity, assessment of emotional functions, multicomponent rehabilitation programme, therapeutic exercise, education and counselling on self-management, health status monitoring, psychological interventions                                                  | Health workers              | Nurse, psychologist, dieticians                                                            | Yes |
| <b>J. S. Myers, 2020</b>     | Specialized health care | Home, community                | Assessment of cognitive functions, cognitive rehabilitation                                                                                                                                                                                                                                                                                            | Health workers              | PRM physicians, psychologist                                                               | No  |
| <b>J. Miller, 2020</b>       | Primary health care     | Community                      | Education and counselling in self-management, behavioural interventions                                                                                                                                                                                                                                                                                | Health workers, the patient | Physical therapist                                                                         | No  |
| <b>M. Markle-Reid, 2020</b>  | Multiple levels of care | Outpatient, home               | Assessment of person-centred goals and priorities for health care, case management, multicomponent rehabilitation programme, follow-up, problem solving skills training, caregivers' education and training, education and counselling in self-management                                                                                              | Health workers              | Occupational therapist, physical therapist, speech and language therapists, social workers | Yes |
| <b>J. Mann, 2020</b>         | Multiple levels of care | Outpatient                     | Comprehensive geriatric assessment, case management                                                                                                                                                                                                                                                                                                    | Health workers              | Other physicians, nurse, occupational therapist, general practitioner                      | Yes |
| <b>W.-Y. Li, 2020</b>        | Specialized health care | Outpatient                     | Health status monitoring, education and counselling on nutrition, education and counselling on physical activity                                                                                                                                                                                                                                       | The patient                 | –                                                                                          | –   |
| <b>M. Kraepelien, 2020</b>   | Specialized health care | Telerehabilitation             | Psychological interventions                                                                                                                                                                                                                                                                                                                            | Health workers              | Psychologist                                                                               | No  |
| <b>E. H. Koolen, 2020</b>    | Multiple levels of care | Outpatient, inpatient          | Assessment of health status, comprehensive assessment of functioning, assessment of person-centred goals and priorities for health care, behavioural interventions, education and counselling in self-management, health status monitoring, case management, pharmacological therapy, optimization of pharmacological therapy, motivational activities | Health workers              | Physical therapist, occupational therapist, psychologist, nurse, social workers            | Yes |
| <b>M. V. Knudsen, 2020</b>   | Specialized health care | Telerehabilitation             | Therapeutic exercise, education and counselling on nutrition, education and counselling in self-management, social care and support plan                                                                                                                                                                                                               | Health workers              | Physical therapist, nurse, dieticians                                                      | Yes |
| <b>O. Kamoen, 2020</b>       | Specialized health care | Telerehabilitation, outpatient | Education and counselling in self-management, health status monitoring, follow-up                                                                                                                                                                                                                                                                      | Health workers              | Nurse, other physicians                                                                    | No  |
| <b>H. Hansen, 2020</b>       | Specialized health care | Telerehabilitation             | Therapeutic exercise, education and counselling in self-management                                                                                                                                                                                                                                                                                     | –                           | –                                                                                          | –   |
| <b>A. M. Gustavson, 2020</b> | Specialized health care | Inpatient                      | Therapeutic exercise, activities of daily living skills training, rehabilitation coordination and management                                                                                                                                                                                                                                           | Health workers              | Occupational therapist, physical therapist                                                 | No  |
| <b>A. W. Deng, 2020</b>      | Multiple levels of care | Inpatient, home                | Pharmacological therapy, multicomponent rehabilitation programme, education and counselling in self-management, follow-up, case management, health status monitoring                                                                                                                                                                                   | Health workers              | PRM physicians, nurse, general practitioner, other physicians                              | Yes |
| <b>J. de Battle, 2020</b>    | Multiple levels of care | Telerehabilitation             | Assessment of health status, assessment of person-centred goals and priorities for health care, health status monitoring, case management education and counselling in self-management                                                                                                                                                                 | Health workers, the patient | –                                                                                          | No  |

|                                                |                         |                       |                                                                                                                                                                                                                                                                                                |                                   |                                                          |     |
|------------------------------------------------|-------------------------|-----------------------|------------------------------------------------------------------------------------------------------------------------------------------------------------------------------------------------------------------------------------------------------------------------------------------------|-----------------------------------|----------------------------------------------------------|-----|
| <b>S. S. Conroy, 2020</b>                      | Specialized health care | Telerehabilitation    | Therapeutic exercise                                                                                                                                                                                                                                                                           | Health workers                    | Occupational therapist                                   | No  |
| <b>D. Hevey, 2020</b>                          | Primary health care     | Community             | Peer support or peer support group, education and counselling in self-management, assessment of person-centred goals and priorities for health care, behavioural interventions                                                                                                                 | Peers and volunteers, the patient | –                                                        | No  |
| <b>D. S. Lipardo, 2020</b>                     | Specialized health care | Community             | Therapeutic exercise, cognitive training                                                                                                                                                                                                                                                       | Health workers                    | Physical therapist, occupational therapist               | No  |
| <b>K. Laver, 2020</b>                          | Specialized health care | Telerehabilitation    | Comprehensive assessment of functioning, assessment of environment, caregivers' education and training, assessment of family and caregivers' needs, knowledge, and skills, activities of daily living skills training                                                                          | Health workers                    | Occupational therapist, nurse                            | No  |
| <b>A. K. C. Wong, 2019</b>                     | Primary health care     | Community             | Comprehensive assessment of functioning, assessment of person-centred goals and priorities for health care, education and counselling in self-management, social care and support plan, case management, assessment of environment, follow-up                                                  | Health workers, the patient       | Nurse, community health worker, social workers           | Yes |
| <b>K. von Storch, 2019</b>                     | Primary health care     | Telerehabilitation    | Assessment of person-centred goals and priorities for health care, health status monitoring, education and counselling in self-management, behavioural interventions, motivational activities                                                                                                  | The patient                       | –                                                        | –   |
| <b>M. Ranner, 2019</b>                         | Specialized health care | Outpatient            | Comprehensive assessment of functioning, assessment of person-centred goals and priorities for health care, activities of daily living skills training, problem solving skills training                                                                                                        | Health workers                    | Occupational therapist                                   | No  |
| <b>B. B. Nilsson, 2019</b>                     | Primary health care     | Outpatient            | Therapeutic exercise, education and counselling in self-management, motivational activities                                                                                                                                                                                                    | Health workers                    | Physical therapist, other physicians, psychologist       | Yes |
| <b>R. Maddison, 2019</b>                       | Specialized health care | Telerehabilitation    | Behavioural interventions, education and counselling on physical activity or exercise, therapeutic exercise, motivational activities                                                                                                                                                           | Health workers                    | Community health worker                                  | No  |
| <b>Y. Ko, 2019</b>                             | Multiple levels of care | Outpatient, inpatient | Assessment of emotional functions, assessment of health status, assessment of fall risk, assessment of frailty, emotional support, activities of daily living skills training, therapeutic exercise, education and counselling in self-management, discharge planning, motivational activities | Health workers                    | Nurse                                                    | No  |
| <b>W. Ji, 2019</b>                             | Specialized health care | Telerehabilitation    | Assessment of person-centred goals and priorities for health care, therapeutic exercise, health status monitoring                                                                                                                                                                              | Health workers                    | Other physicians, nurse                                  | No  |
| <b>J. Hou, 2019</b>                            | Specialized health care | Telerehabilitation    | Pharmacological therapy, therapeutic exercise, education and counselling on physical activity or exercise, follow-up                                                                                                                                                                           | Health workers                    | Other physicians                                         | No  |
| <b>R. Hwang<br/>N. R. Morris<br/>A. , 2019</b> | Specialized health care | Telerehabilitation    | Education and counselling in self-management, therapeutic exercise, health status monitoring                                                                                                                                                                                                   | Health workers                    | Physical therapist, nurse                                | No  |
| <b>W. Choi, 2019</b>                           | Specialized health care | Telerehabilitation    | Therapeutic exercise                                                                                                                                                                                                                                                                           | Health workers                    | Physical therapist                                       | No  |
| <b>S. C. Cramer, 2019</b>                      | Specialized health care | Telerehabilitation    | Education and counselling in self-management, activities of daily living skills training, assessment of person-centred goals and priorities for health care, therapeutic exercise, follow-up                                                                                                   | Health workers                    | Physical therapist, occupational therapist               | No  |
| <b>D. K. Y. Chan, 2019</b>                     | Specialized health care | Eldercare institution | Occupational therapy, physical therapy, social care and support plan                                                                                                                                                                                                                           | Health workers                    | Physical therapist, occupational therapist, geriatrician | Yes |
| <b>T. Lindhardt, 2019</b>                      | Multiple levels of care | Inpatient, outpatient | Education and counselling in self-management, behavioural interventions, motivational activities, follow-up                                                                                                                                                                                    | Health workers                    | Nurse                                                    | No  |

|                                   |                         |                                |                                                                                                                                                                                                                                                                                                                                                |                                                   |                                                                 |     |
|-----------------------------------|-------------------------|--------------------------------|------------------------------------------------------------------------------------------------------------------------------------------------------------------------------------------------------------------------------------------------------------------------------------------------------------------------------------------------|---------------------------------------------------|-----------------------------------------------------------------|-----|
| <b>C. D. S. Langoni, 2019</b>     | Primary health care     | Community                      | Therapeutic exercise, motivational activities                                                                                                                                                                                                                                                                                                  | –                                                 | –                                                               | –   |
| <b>P. Bernocchi, 2019</b>         | Specialized health care | Telerehabilitation             | Comprehensive assessment of functioning, education and counselling in self-management, assessment of environment, assessment of fall risk, therapeutic exercise, follow-up, health status monitoring, functioning monitoring, caregivers' education and training                                                                               | Health workers, informal caregivers and family    | Physical therapist, nurse                                       | No  |
| <b>H. R. Dial, 2019</b>           | Specialized health care | Telerehabilitation             | Speech therapy and language therapy                                                                                                                                                                                                                                                                                                            | The patient                                       | –                                                               | –   |
| <b>S. Isernia, 2019</b>           | Multiple levels of care | Outpatient, telerehabilitation | Cognitive training, therapeutic exercise, assessment of person-centred goals and priorities for health care, follow-up, motivational activities                                                                                                                                                                                                | Health workers                                    | Physical therapist, psychologist                                | No  |
| <b>T. H. Nøst, 2018</b>           | Primary health care     | Community                      | Education and counselling in self-management, education and counselling on physical activity or exercise, psychological interventions, behavioural interventions                                                                                                                                                                               | Health workers, the patient                       | Physical therapist                                              | No  |
| <b>T. H. Nøst, 2018</b>           | Primary health care     | Community                      | Education and counselling in self-management, psychological interventions, behavioural interventions, therapeutic exercise, peer support group                                                                                                                                                                                                 | Health workers, the patient                       | Physical therapist                                              | No  |
| <b>S. Mohammadi-Kalaveh, 2018</b> | Specialized health care | Outpatient                     | Therapeutic exercise, psychological interventions, education and counselling on nutrition, education and counselling in self-management                                                                                                                                                                                                        | Health workers                                    | Nurse, physical therapist, psychologist, dieticians             | Yes |
| <b>V. M. Mendoza-Núñez, 2018</b>  | Primary health care     | Community                      | Education and counselling in self-management                                                                                                                                                                                                                                                                                                   | Health workers                                    | Geriatrician                                                    | No  |
| <b>K. S. McGilton, 2018</b>       | Specialized health care | Inpatient                      | Assessment of person-centred goals and priorities for health care, provision and training in the use of assistive products, language therapy                                                                                                                                                                                                   | Health workers                                    | Nurse                                                           | No  |
| <b>M. Markle-Reid, 2018</b>       | Primary health care     | Community                      | Assessment of person-centred goals and priorities for health care, education and counselling on nutrition, education and counselling in self-management, follow-up, peer support or peer support group, case management, motivational activities                                                                                               | Health workers, peers and volunteers, the patient | Nurse, dieticians, other                                        | Yes |
| <b>E. Lycholip, 2018</b>          | Primary health care     | Telerehabilitation             | Assessment of health status, health status monitoring, education and counselling in self-management                                                                                                                                                                                                                                            | Health workers                                    | Nurse                                                           | No  |
| <b>L. Lachance, 2018</b>          | Primary health care     | Community                      | Peer support or peer support group, education and counselling in self-management, social care and support plan, case management, caregivers' education and training                                                                                                                                                                            | Health workers                                    | Community health worker                                         | No  |
| <b>J. T. Kamwesiga, 2018</b>      | Primary health care     | Telerehabilitation             | Assessment of person-centred goals and priorities for health care, occupational therapy, activities of daily living skills training, caregivers' education and training                                                                                                                                                                        | Health workers, informal caregivers and family    | Occupational therapist                                          | No  |
| <b>M. Inzitari, 2018</b>          | Primary health care     | Community                      | Assessment of frailty, assessment of health status, comprehensive assessment of functioning, optimization of pharmacological therapy, assessment of nutritional status, therapeutic exercise, education and counselling on physical activity or exercise, education and counselling in self-management, education and counselling on nutrition | Health workers                                    | Nurse, physical therapist, social workers, general practitioner | Yes |
| <b>S. A. Hicks, 2018</b>          | Specialized health care | Telerehabilitation             | Education and counselling in self-management, health status monitoring                                                                                                                                                                                                                                                                         | Health workers                                    | Nurse                                                           | No  |
| <b>M. He, 2018</b>                | Multiple levels of care | Inpatient, outpatient          | Case management, discharge planning, assessment of health status, physical therapy                                                                                                                                                                                                                                                             | Health workers                                    | General practitioner, nurse, physical therapist                 | Yes |
| <b>M. C. V. Gonzaga, 2018</b>     | Specialized health care | Inpatient                      | Education and counselling in self-management                                                                                                                                                                                                                                                                                                   | The patient                                       | –                                                               | –   |

|                               |                         |                               |                                                                                                                                                                                                                                                                                                                                                                                                                                            |                                                             |                                                                                                 |     |
|-------------------------------|-------------------------|-------------------------------|--------------------------------------------------------------------------------------------------------------------------------------------------------------------------------------------------------------------------------------------------------------------------------------------------------------------------------------------------------------------------------------------------------------------------------------------|-------------------------------------------------------------|-------------------------------------------------------------------------------------------------|-----|
| <b>N. Godtfredsen, 2018</b>   | Primary health care     | Community                     | Assessment of health status, therapeutic exercise, education and counselling in self-management, education and counselling on nutrition, social care and support plan, psychological interventions, education and counselling on physical activity or exercise                                                                                                                                                                             | Health workers                                              | Nurse, physical therapist, general practitioner, dieticians                                     | Yes |
| <b>C. B. Franse, 2018</b>     | Multiple levels of care | Community                     | Assessment of health status, comprehensive assessment of functioning, assessment of person-centred goals and priorities for health care, assessment of fall risk, assessment of emotional functions, assessment of frailty, case management, follow-up, optimization of pharmacological therapy, therapeutic exercise, social care and support plan                                                                                        | Health workers                                              | Other physicians, nurse                                                                         | No  |
| <b>I. H. J. Everink, 2018</b> | Multiple levels of care | Inpatient                     | Case management, discharge planning, comprehensive assessment of functioning, multicomponent rehabilitation program, caregivers' education and training                                                                                                                                                                                                                                                                                    | Health workers, informal caregivers and family              | Nurse, general practitioner, physical therapist, occupational therapist                         | Yes |
| <b>D. M. Ehde, 2018</b>       | Primary health care     | Telerehabilitation, community | Follow-up, education and counselling in self-management, behavioural interventions, education and counselling on nutrition                                                                                                                                                                                                                                                                                                                 | Health workers, the patient                                 | Therapist not specified                                                                         | No  |
| <b>C. Dye, 2018</b>           | Primary health care     | Community                     | Education and counselling in self-management, health status monitoring, assessment of health status, comprehensive assessment of functioning, assessment of person-centred goals and priorities for health care, assessment of fall risk, follow-up, education and counselling on nutrition, education and counselling on physical activity or exercise, social care and support plan, case management, caregivers' education and training | Peers and volunteers, the patient                           | –                                                                                               | No  |
| <b>P. W. Duncan, 2018</b>     | Multiple levels of care | Inpatient, outpatient         | Assessment of person-centred goals and priorities for health care                                                                                                                                                                                                                                                                                                                                                                          | Health workers, informal caregivers and family              | General practitioner, physical therapist, occupational therapist, speech and language therapist | Yes |
| <b>A. Döbler, 2018</b>        | Specialized health care | Telerehabilitation            | Assessment of person-centred goals and priorities for health care, behavioural interventions, education and counselling in self-management, education and counselling on physical activity or exercise, education and counselling on nutrition, social care and support plan, assessment of emotional functions, caregivers' education and training, motivational activities                                                               | Health workers                                              | Other                                                                                           | No  |
| <b>S. G. Dean, 2018</b>       | Primary health care     | Community, home               | Assessment of person-centred goals and priorities for health care, therapeutic exercise, education and counselling in self-management, education and counselling on physical activity or exercise, follow-ups visits                                                                                                                                                                                                                       | Health workers                                              | Community health worker                                                                         | No  |
| <b>C. K. Clevenger, 2018</b>  | Primary health care     | Eldercare institution         | Assessment of person-centred goals and priorities for health care, social care and support plan, caregivers' education and training                                                                                                                                                                                                                                                                                                        | Health workers, informal caregivers and family              | Geriatrician, nurse, social workers                                                             | Yes |
| <b>L. Chen, 2018</b>          | Specialized health care | Inpatient                     | Assessment of person-centred goals and priorities for health care, comprehensive assessment of functioning, follow-up, assessment of health status, education and counselling in self-management, problem solving skills training, peer support or peer support group, discharge planning                                                                                                                                                  | Health workers, informal caregivers and family, the patient | Nurse                                                                                           | No  |
| <b>A. Avila, 2018</b>         | Specialized health care | Outpatient, home              | Health status monitoring, therapeutic exercise, education and counselling on physical activity or exercise, follow-up                                                                                                                                                                                                                                                                                                                      | Health workers                                              | Physical therapist                                                                              | No  |
| <b>O. Adogwa, 2018</b>        | Specialized health care | Inpatient                     | Assessment of health status, comprehensive assessment of functioning, multicomponent rehabilitation programme                                                                                                                                                                                                                                                                                                                              | Health workers                                              | Geriatrician                                                                                    | No  |
| <b>Y. Zhang, 2018</b>         | Multiple levels of care | Community, home               | Pharmacological therapy, therapeutic exercise, health status monitoring                                                                                                                                                                                                                                                                                                                                                                    | Health workers, informal caregivers and family              | General practitioner                                                                            | No  |

|                                    |                         |                                |                                                                                                                                                                                                                                                                                                                                                                                                              |                                      |                                                                |     |
|------------------------------------|-------------------------|--------------------------------|--------------------------------------------------------------------------------------------------------------------------------------------------------------------------------------------------------------------------------------------------------------------------------------------------------------------------------------------------------------------------------------------------------------|--------------------------------------|----------------------------------------------------------------|-----|
| <b>P. Zhang, 2018</b>              | Multiple levels of care | Outpatient, inpatient          | Discharge planning, education and counselling in self-management, education and counselling on healthy lifestyle behaviours, comprehensive assessment of functioning, follow-up, case management                                                                                                                                                                                                             | Health workers                       | Nurse                                                          | No  |
| <b>P. J. Whitehead, 2018</b>       | Primary health care     | Home                           | Assessment of environment, environmental modifications                                                                                                                                                                                                                                                                                                                                                       | Health workers                       | Occupational therapist                                         | No  |
| <b>S. Ward, 2018</b>               | Specialized health care | Telerehabilitation             | Education and counselling in self-management                                                                                                                                                                                                                                                                                                                                                                 | Health workers                       | Occupational therapist, nurse, psychologist, other, dieticians | Yes |
| <b>J. Wang, 2018</b>               | Specialized health care | Telerehabilitation             | Therapeutic exercise, follow-up, functioning monitoring, health status monitoring, education and counselling in self-management                                                                                                                                                                                                                                                                              | Health workers                       | Nurse                                                          | No  |
| <b>M. R. J. van Lieshout, 2018</b> | Primary health care     | Community                      | Social skills training, therapeutic exercise, education and counselling on self-management, problem-solving skills training, cognitive training, optimization of pharmacological therapy, education and counselling on nutrition                                                                                                                                                                             | Health workers                       | Physical therapist, nurse, dieticians                          | Yes |
| <b>B. Valdivieso, 2018</b>         | Primary health care     | Telerehabilitation             | Health status monitoring, follow-up, education and counselling in self-management, caregivers' education and training, social care and support plan                                                                                                                                                                                                                                                          | Health workers                       | Nurse                                                          | No  |
| <b>M. Tistad, 2018</b>             | Multiple levels of care | Inpatient, home                | Assessment of person-centred goals and priorities for health care, multicomponent rehabilitation programme, activities of daily living skills training                                                                                                                                                                                                                                                       | Health workers                       | Occupational therapist                                         | No  |
| <b>E. Taube, 2018</b>              | Primary health care     | Home                           | Assessment of health status, comprehensive assessment of functioning, assessment of person-centred goals and priorities for health care, assessment of polypharmacy, assessment of emotional functions, assessment of fall risk, social care and support plan, emotional support, therapeutic exercise, social skills training, case management, follow-up, health status monitoring, functioning monitoring | Health workers                       | Physical therapist, nurse                                      | No  |
| <b>J. L. Roberts, 2018</b>         | Multiple levels of care | Community                      | Assessment of person-centred goals and priorities for health care, occupational therapy, physical therapy, education and counselling in self-management, education and counselling on physical activity or exercise                                                                                                                                                                                          | Health workers                       | Physical therapist, occupational therapist, other              | Yes |
| <b>R. L. Reed, 2018</b>            | Specialized health care | Outpatient                     | Assessment of person-centred goals and priorities for health care, comprehensive assessment of functioning, psychological interventions, behavioural interventions                                                                                                                                                                                                                                           | Health workers, the patient          | _                                                              | No  |
| <b>D. Martel, 2018</b>             | Primary health care     | Outpatient, home               | Therapeutic exercise, follow-up                                                                                                                                                                                                                                                                                                                                                                              | Health workers                       | Physical therapist                                             | No  |
| <b>A. I. I. King, 2018</b>         | Primary health care     | Community                      | Comprehensive assessment of functioning, comprehensive geriatric assessment, functioning monitoring, assessment of polypharmacy, case management, follow-up                                                                                                                                                                                                                                                  | Health workers, peers and volunteers | General practitioner, nurse                                    | No  |
| <b>K. Finlayson, 2018</b>          | Multiple levels of care | Telerehabilitation, outpatient | Therapeutic exercise, follow-up                                                                                                                                                                                                                                                                                                                                                                              | Health workers                       | Nurse                                                          | No  |
| <b>M. Melin, 2018</b>              | Specialized health care | Telerehabilitation             | Education and counselling in self-management, education and counselling on, healthy lifestyle behaviours, health status monitoring                                                                                                                                                                                                                                                                           | Health workers, the patient          | Nurse                                                          | No  |
| <b>R. L. Burton, 2018</b>          | Specialized health care | Telerehabilitation             | Assessment of person-centred goals and priorities for health care, cognitive rehabilitation, psychological interventions, assessment of cognitive functions, assessment of emotional functions                                                                                                                                                                                                               | Health workers                       | Psychologist                                                   | No  |
| <b>J. Hong, 2018</b>               | Specialized health care | Telerehabilitation             | Therapeutic exercise                                                                                                                                                                                                                                                                                                                                                                                         | Health workers                       | Psychologist                                                   | No  |
| <b>M. Renda, 2018</b>              | Specialized health care | Telerehabilitation             | Comprehensive assessment of functioning, assessment of environment, environmental modifications, provision and training in the use of assistive products                                                                                                                                                                                                                                                     | Health workers                       | Occupational therapist                                         | No  |

|                                 |                         |                       |                                                                                                                                                                                                                                                                                                                                                           |                                                |                                                                              |     |
|---------------------------------|-------------------------|-----------------------|-----------------------------------------------------------------------------------------------------------------------------------------------------------------------------------------------------------------------------------------------------------------------------------------------------------------------------------------------------------|------------------------------------------------|------------------------------------------------------------------------------|-----|
| <b>K. D. Allen, 2018</b>        | Specialized health care | Telerehabilitation    | Comprehensive assessment of functioning, therapeutic exercise, motivational activities, functioning monitoring, health status monitoring, manual therapy, provision and training in the use of assistive products                                                                                                                                         | Health workers                                 | Physical therapist                                                           | No  |
| <b>A. O'Moore K, 2018</b>       | Specialized health care | Telerehabilitation    | Education and counselling in self-management, psychological interventions                                                                                                                                                                                                                                                                                 | Health workers                                 | Psychologist                                                                 | No  |
| <b>C. Anderson-Hanley, 2018</b> | Specialized health care | Telerehabilitation    | Therapeutic exercise, cognitive training                                                                                                                                                                                                                                                                                                                  | –                                              | –                                                                            | –   |
| <b>P. Bernocchi, 2018</b>       | Specialized health care | Telerehabilitation    | Therapeutic exercise, education and counselling in self-management                                                                                                                                                                                                                                                                                        | Health workers                                 | Physical therapist, nurse                                                    | No  |
| <b>L. Zhang, 2017</b>           | Primary health care     | Home, community       | Comprehensive assessment of functioning, assessment of emotional functions, follow-up, therapeutic exercise, education and counselling on healthy lifestyle behaviours, peer support or peer support group, caregivers' education and training                                                                                                            | Health workers                                 | Nurse, dieticians, psychologist, other physicians                            | Yes |
| <b>F. A. Vega-Ramírez, 2017</b> | Primary health care     | Home                  | Therapeutic exercise, activities of daily living skills training, assessment of person-centred goals and priorities for health care, assessment of fall risk, social care and support plan, caregivers' education and training                                                                                                                            | Health workers, informal caregivers and family | PRM physicians, physical therapist, occupational therapist                   | Yes |
| <b>R. Uittenbroek, 2017</b>     | Primary health care     | Community             | Social care and support plan, assessment of person-centred goals and priorities for health care, follow-up, health status monitoring, functioning monitoring, education and counselling in self-management, rehabilitation coordination and management                                                                                                    | Health workers                                 | Geriatrician, nurse, social workers, general practitioner                    | Yes |
| <b>S. Tanaka, 2017</b>          | Specialized health care | Eldercare institution | Cognitive rehabilitation, therapeutic exercise                                                                                                                                                                                                                                                                                                            | Health workers                                 | –                                                                            | –   |
| <b>X. Ru, 2017</b>              | Primary health care     | Community, home       | Comprehensive assessment of functioning, multicomponent rehabilitation programme, education and counselling in self-management, caregivers' education and training                                                                                                                                                                                        | Health workers                                 | Community health worker                                                      | No  |
| <b>S. Palmcrantz, 2017</b>      | Specialized health care | Telerehabilitation    | Comprehensive assessment of functioning, therapeutic exercise                                                                                                                                                                                                                                                                                             | Health workers                                 | Physical therapist                                                           | No  |
| <b>A.-F. Leclerc, 2017</b>      | Specialized health care | Outpatient            | Therapeutic exercise, education and counselling in self-management, psychological interventions                                                                                                                                                                                                                                                           | Health workers                                 | Physical therapist, psychologist                                             | No  |
| <b>P. Kitzman, 2017</b>         | Primary health care     | Community             | Case management, discharge planning, follow-up, assessment of environment, environmental modifications, social care and support plan, education and counselling in self-management, caregivers' education and training                                                                                                                                    | Health workers                                 | Community health worker                                                      | No  |
| <b>I. H. J. Everink, 2017</b>   | Multiple levels of care | Inpatient             | Rehabilitation coordination and management, case management, discharge planning, comprehensive assessment of functioning, assessment of person-centred goals and priorities for health care, multicomponent rehabilitation programme                                                                                                                      | Health workers, informal caregivers and family | Nurse, general practitioner, physical therapist, occupational therapist      | Yes |
| <b>M. S. Holstege, 2017</b>     | Specialized health care | Eldercare institution | Assessment of person-centred goals and priorities for health care, case management, multicomponent rehabilitation programme, caregivers' education and training                                                                                                                                                                                           | Health workers                                 | Geriatrician, physical therapist, nurse                                      | Yes |
| <b>K. M. Hjelle, 2017</b>       | Multiple levels of care | Home                  | Rehabilitation coordination and management, follow-up, assessment of person-centred goals and priorities for health care, assessment of environment, environmental modifications, provision and training in the use of assistive products, activities of daily living skills training, therapeutic exercise, education and counselling in self-management | Health workers                                 | Physical therapist, occupational therapist, other                            | Yes |
| <b>A. de Vos, 2017</b>          | Specialized health care | Inpatient             | Comprehensive assessment of functioning, caregivers' education and training, follow-up, case management, multidisciplinary geriatric care                                                                                                                                                                                                                 | Health workers                                 | Other physicians, physical therapist, occupational therapist, social workers | Yes |



|                                                               |                         |                    |                                                                                                                                                                                                                                                                                                                                                                                                                |                                                |                                                                                           |     |
|---------------------------------------------------------------|-------------------------|--------------------|----------------------------------------------------------------------------------------------------------------------------------------------------------------------------------------------------------------------------------------------------------------------------------------------------------------------------------------------------------------------------------------------------------------|------------------------------------------------|-------------------------------------------------------------------------------------------|-----|
| <b>N. Cecins, 2017</b>                                        | Primary health care     | Community          | Therapeutic exercise, pharmacological therapy, education and counselling in self-management, follow-up                                                                                                                                                                                                                                                                                                         | Health workers                                 | Physical therapist                                                                        | No  |
| <b>N. Bleijenberg, 2017</b>                                   | Primary health care     | Home               | Case management, follow-up, functioning monitoring, health status monitoring, assessment of person-centred goals and priorities for health care, comprehensive geriatric assessment, assessment of family and caregivers' needs, knowledge, and skills, multidisciplinary geriatric care, education and counselling in self-management, caregivers' education and training, management of urinary incontinence | Health workers                                 | Nurse                                                                                     | No  |
| <b>R. N. Barker, 2017</b>                                     | Primary health care     | Outpatient         | Assessment of person-centred goals and priorities for health care, rehabilitation coordination and management, multicomponent rehabilitation programme, education and counselling in self-management, follow-up                                                                                                                                                                                                | Health workers                                 | Speech and language therapists, occupational therapist, nurse, social workers, dieticians | Yes |
| <b>J. J. Kraal, 2017</b>                                      | Multiple levels of care | Home               | Therapeutic exercise, assessment of person-centred goals and priorities for health care, health status monitoring, follow-up, education and counselling on physical activity or exercise                                                                                                                                                                                                                       | Health workers                                 | Physical therapist                                                                        | No  |
| <b>K. Brueggen, 2017</b>                                      | Specialized health care | Outpatient         | Cognitive rehabilitation, activities of daily living skills training, psychological interventions, assessment of person-centred goals and priorities for health care, comprehensive assessment of functioning, provision and training in the use of assistive products, caregivers' education and training                                                                                                     | Health workers                                 | Occupational therapist, psychologist                                                      | No  |
| <b>J. Chen, 2017</b>                                          | Specialized health care | Telerehabilitation | Therapeutic exercise, activities of daily living skills training, electromyography-triggered neuromuscular stimulation, assessment of person-centred goals and priorities for health care, caregivers' education and training                                                                                                                                                                                  | Health workers, informal caregivers and family | Occupational therapist, physical therapist                                                | No  |
| <b>M. A. Mas, 2017</b>                                        | Multiple levels of care | Inpatient, home    | Multicomponent rehabilitation programme                                                                                                                                                                                                                                                                                                                                                                        | Health workers                                 | Physical therapist, occupational therapist, PRM physicians, geriatrician                  | Yes |
| <b>S. Santana, 2017</b>                                       | Multiple levels of care | Home               | Discharge planning, provision and training in the use of assistive products, environmental modifications, assessment of environment, education and counselling in self-management, caregivers' education and training, activities of daily living skills training, case management, comprehensive functioning assessment, rehabilitation coordination and management                                           | Health workers                                 | Physical therapist, occupational therapist, psychologist                                  | Yes |
| <b>T. Ueda, 2017</b>                                          | Specialized health care | Home               | Education and counselling in self-management, environmental modifications, assessment of environment, provision and training in the use of assistive products, assessment of fall risk                                                                                                                                                                                                                         | Health workers                                 | Physical therapist                                                                        | No  |
| <b>J. Hong, 2017</b>                                          | Specialized health care | Telerehabilitation | Therapeutic exercise                                                                                                                                                                                                                                                                                                                                                                                           | The patient                                    | –                                                                                         | –   |
| <b>R. Hwang<br/>J. Bruning<br/>N. R. Morris<br/>A. , 2017</b> | Specialized health care | Telerehabilitation | Therapeutic exercise, education and counselling in self-management                                                                                                                                                                                                                                                                                                                                             | Health workers                                 | Occupational therapist, nurse, social workers, dieticians                                 | Yes |
| <b>A.-B. Zakrisson, 2016</b>                                  | Primary health care     | Outpatient         | Education and counselling in self-management, therapeutic exercise, education and counselling on healthy lifestyle behaviours, caregivers' education and training                                                                                                                                                                                                                                              | Health workers                                 | Physical therapist, occupational therapist, nurse, social workers                         | Yes |
| <b>K. Young-Mee, 2016</b>                                     | Primary health care     | Community          | Therapeutic exercise, psychological interventions, emotional support, therapeutic recreation, motivational activities                                                                                                                                                                                                                                                                                          | Health workers                                 | Other, social workers                                                                     | No  |
| <b>A. Wolf, 2016</b>                                          | Multiple levels of care | Telerehabilitation | Person centred care, education and counselling in self-management, health status monitoring, functioning monitoring                                                                                                                                                                                                                                                                                            | Health workers, the patient                    | Other physicians, nurse                                                                   | No  |

|                                          |                         |                            |                                                                                                                                                                                                                                                                                                                                                                                                                                                                             |                                                |                                                                                 |     |
|------------------------------------------|-------------------------|----------------------------|-----------------------------------------------------------------------------------------------------------------------------------------------------------------------------------------------------------------------------------------------------------------------------------------------------------------------------------------------------------------------------------------------------------------------------------------------------------------------------|------------------------------------------------|---------------------------------------------------------------------------------|-----|
| <b>S. N. W. Vorrink, 2016</b>            | Primary health care     | Telerehabilitation         | Assessment of person-centred goals and priorities for health care, therapeutic exercise, health status monitoring, functioning monitoring                                                                                                                                                                                                                                                                                                                                   | Health workers                                 | Physical therapist                                                              | No  |
| <b>M. van den Berg, 2016</b>             | Multiple levels of care | Inpatient, home            | Multicomponent rehabilitation programme, rehabilitation coordination and management, discharge planning, follow-up, health status monitoring, functioning monitoring, caregivers' education and training, therapeutic exercise, motivational activities                                                                                                                                                                                                                     | Health workers, informal caregivers and family | Physical therapist                                                              | No  |
| <b>M. Y. Tseng, 2016</b>                 | Multiple levels of care | Inpatient, home            | Multicomponent rehabilitation programme, rehabilitation coordination and management, therapeutic exercise, comprehensive assessment of functioning, comprehensive geriatric assessment, assessment of family and caregivers' needs, knowledge, and skills, assessment of person-centred goals and priorities for health care, discharge planning, follow-up, education and counselling in self-management, caregivers' education and training, social care and support plan | Health workers                                 | Geriatrician, nurse, physical therapist, PRM physicians                         | Yes |
| <b>M.-Y. Tseng, 2016</b>                 | Multiple levels of care | Inpatient, home            | Assessment of fall risk, assessment of polypharmacy, comprehensive assessment of functioning, comprehensive geriatric assessment, assessment of emotional functions, discharge planning, follow-up, multicomponent rehabilitation programme, therapeutic exercise, pharmacological therapy, psychological interventions, education and counselling on nutrition, social care and support plan, environmental modifications, assessment of environment                       | Health workers                                 | Nurse, geriatrician                                                             | No  |
| <b>F. J. Tarazona-Santabalbina, 2016</b> | Primary health care     | Outpatient                 | Therapeutic exercise, health status monitoring                                                                                                                                                                                                                                                                                                                                                                                                                              | Health workers                                 | Physical therapist, nurse                                                       | No  |
| <b>M. Smaerup, 2016</b>                  | Specialized health care | Telerehabilitation         | Functioning monitoring, therapeutic exercise                                                                                                                                                                                                                                                                                                                                                                                                                                | Health workers                                 | Physical therapist                                                              | No  |
| <b>S. Shinkai, 2016</b>                  | Primary health care     | Community                  | Comprehensive geriatric assessment, functioning monitoring, education and counselling on healthy lifestyle behaviours, education and counselling on physical activity or exercise, therapeutic exercise, social care and support plan, education and counselling on nutrition                                                                                                                                                                                               | Health workers                                 | General practitioner, nurse                                                     | No  |
| <b>F. G. H. Ruikes, 2016</b>             | Primary health care     | Outpatient                 | Assessment of polypharmacy, rehabilitation coordination and management, case management, functioning monitoring, follow-up, health status monitoring, assessment of person-centred goals and priorities for health care, social care and support plan                                                                                                                                                                                                                       | Health workers                                 | Geriatrician, nurse, general practitioner                                       | Yes |
| <b>D. Rosen, 2016</b>                    | Primary health care     | Telerehabilitation         | Case management, education and counselling on nutrition, functioning monitoring, follow-up, health status monitoring, assessment of person-centred goals and priorities for health care, education and counselling in self-management, behavioural interventions, education and counselling on healthy lifestyle behaviours                                                                                                                                                 | Health workers, the patient                    | Social workers                                                                  | No  |
| <b>F. C. Pannill, 2016</b>               | Multiple levels of care | Inpatient, eldercare, home | Comprehensive geriatric assessment, follow-up, discharge planning                                                                                                                                                                                                                                                                                                                                                                                                           | Health workers                                 | Nurse, general practitioner                                                     | No  |
| <b>M. J. Meunier, 2016</b>               | Multiple levels of care | Inpatient, outpatient      | Assessment of person-centred goals and priorities for health care, multicomponent rehabilitation programme, pharmacological therapy, rehabilitation coordination and management, social care and support plan                                                                                                                                                                                                                                                               | Health workers                                 | Occupational therapist, general practitioner, nurse, social workers, dieticians | Yes |
| <b>R. J. McNamara, 2016</b>              | Primary health care     | Community                  | Therapeutic exercise                                                                                                                                                                                                                                                                                                                                                                                                                                                        | Health workers                                 | Physical therapist                                                              | No  |
| <b>A. McCluskey, 2016</b>                | Specialized health care | Inpatient                  | Therapeutic exercise, therapeutic recreation                                                                                                                                                                                                                                                                                                                                                                                                                                | Health workers                                 | Physical therapist, occupational therapist, other                               | Yes |

|                             |                         |            |                                                                                                                                                                                                                                                                                                                                                                                                                                                                                                                                |                             |                                                                                                 |     |
|-----------------------------|-------------------------|------------|--------------------------------------------------------------------------------------------------------------------------------------------------------------------------------------------------------------------------------------------------------------------------------------------------------------------------------------------------------------------------------------------------------------------------------------------------------------------------------------------------------------------------------|-----------------------------|-------------------------------------------------------------------------------------------------|-----|
| <b>M. À. Mas, 2016</b>      | Primary health care     | Home       | Comprehensive geriatric assessment, assessment of person-centred goals and priorities for health care, rehabilitation coordination and management, activities of daily living skills training, therapeutic exercise, environmental modifications, assessment of fall risk                                                                                                                                                                                                                                                      | Health workers              | Physical therapist, occupational therapist, other physicians, nurse                             | Yes |
| <b>D. L. Marsden, 2016</b>  | Primary health care     | Community  | Comprehensive assessment of functioning, therapeutic exercise, assessment of person-centred goals and priorities for health care, follow-up, education and counselling on physical activity or exercise                                                                                                                                                                                                                                                                                                                        | Health workers              | Physical therapist                                                                              | No  |
| <b>R. López-Liria, 2016</b> | Specialized health care | Home       | Multicomponent rehabilitation programme, rehabilitation coordination and management, assessment of person-centred goals and priorities for health care                                                                                                                                                                                                                                                                                                                                                                         | Health workers              | Physical therapist, occupational therapist, PRM physicians                                      | Yes |
| <b>W. M. Looman, 2016</b>   | Multiple levels of care | Outpatient | Comprehensive assessment of functioning, functioning monitoring, rehabilitation coordination and management, multicomponent care, assessment of person-centred goals and priorities for health care                                                                                                                                                                                                                                                                                                                            | Health workers              | Other physicians, nurse                                                                         | No  |
| <b>W. M. Looman, 2016</b>   | Primary health care     | Outpatient | Multicomponent rehabilitation programme, comprehensive assessment of functioning, assessment of cognitive functions, assessment of emotional functions, assessment of person-centred goals and priorities for health care, rehabilitation coordination and management, case management, assessment of fall risk, assessment of polypharmacy, management of urinary and bowel incontinence                                                                                                                                      | Health workers              | Physical therapist, general practitioner, nurse, other                                          | Yes |
| <b>C. Littlewood, 2016</b>  | Primary health care     | Outpatient | Physical therapy, follow-up, education and counselling on physical activity or exercise                                                                                                                                                                                                                                                                                                                                                                                                                                        | Health workers, the patient | Physical therapist                                                                              | No  |
| <b>Y.-Y. Leung, 2016</b>    | Primary health care     | Community  | Education and counselling in self-management, peer support or peer support group, assessment of person-centred goals and priorities for health care, therapeutic exercise                                                                                                                                                                                                                                                                                                                                                      | Health workers, the patient | Nurse, community health worker                                                                  | No  |
| <b>G. Leung, 2016</b>       | Specialized health care | Inpatient  | Rehabilitation coordination and management, discharge management, physical therapy, occupational therapy, language and speech therapy, social care and support plan, therapeutic recreation                                                                                                                                                                                                                                                                                                                                    | Health workers              | Occupational therapist, nurse, speech and language therapists, general practitioner, dieticians | Yes |
| <b>D. S. Kushner, 2016</b>  | Specialized health care | Inpatient  | Discharge planning, comprehensive assessment of functioning, assessment of health status, assessment of environment, case management, rehabilitation coordination and management, multicomponent rehabilitation programme                                                                                                                                                                                                                                                                                                      | Health workers              | PRM physicians, other physicians, physical therapist                                            | Yes |
| <b>A. Kono, 2016</b>        | Primary health care     | Home       | Comprehensive assessment of functioning, functioning monitoring, assessment of cognitive functions, assessment of person-centred goals and priorities for health care, rehabilitation coordination and management                                                                                                                                                                                                                                                                                                              | Health workers              | Nurse, social workers, other                                                                    | Yes |
| <b>E. Kjerstad, 2016</b>    | Primary health care     | Home       | Comprehensive assessment of functioning, assessment of person-centred goals and priorities for health care, caregivers' education and training, education and counselling in self-management, activities of daily living skills training, provision and training in the use of assistive products, environmental modifications, social care and support plan, occupational therapy, physical therapy                                                                                                                           | Health workers              | Physical therapist, occupational therapist                                                      | No  |
| <b>A. Karlsson, 2016</b>    | Specialized health care | Home       | Assessment of health status, nutritional assessment, rehabilitation coordination and management, case management, comprehensive assessment of functioning, assessment of person-centred goals and priorities for health care, activities of daily living skills training, therapeutic exercise, assessment of fall risk, assessment of polypharmacy, wound care, environmental modifications, assessment of environment, provision and training in the use of assistive products, education and counselling in self-management | Health workers              | Occupational therapist, nurse, social workers, dieticians                                       | Yes |

|                                   |                         |                                |                                                                                                                                                                                                                                                                                                                                                                                                                                                                                         |                                      |                                                                             |     |
|-----------------------------------|-------------------------|--------------------------------|-----------------------------------------------------------------------------------------------------------------------------------------------------------------------------------------------------------------------------------------------------------------------------------------------------------------------------------------------------------------------------------------------------------------------------------------------------------------------------------------|--------------------------------------|-----------------------------------------------------------------------------|-----|
| <b>F. Jones, 2016</b>             | Primary health care     | Community                      | Multicomponent rehabilitation programme, assessment of person-centred goals and priorities for health care, education and counselling in self-management                                                                                                                                                                                                                                                                                                                                | Health workers, the patient          | Occupational therapist, physical therapist, speech and language therapists  | Yes |
| <b>K. Huson, 2016</b>             | Specialized health care | Inpatient                      | Cognitive rehabilitation, provision and training in the use of assistive products, therapeutic exercise, assessment of health status, assessment of nutritional status                                                                                                                                                                                                                                                                                                                  | Health workers, peers and volunteers | –                                                                           | No  |
| <b>C. Graven, 2016</b>            | Multiple levels of care | Outpatient, home               | Multicomponent rehabilitation programme, assessment of person-centred goals and priorities for health care, case management, functioning monitoring, assessment of fall risk, education and counselling in self-management                                                                                                                                                                                                                                                              | Health workers                       | Physical therapist                                                          | No  |
| <b>K.-J. Franke, 2016</b>         | Specialized health care | Telerehabilitation             | Therapeutic exercise, functioning monitoring, motivational activities, follow-up                                                                                                                                                                                                                                                                                                                                                                                                        | –                                    | –                                                                           | –   |
| <b>H. L. Cameron-Tucker, 2016</b> | Primary health care     | Telerehabilitation             | Assessment of person-centred goals and priorities for health care, therapeutic exercise, education and counselling on healthy lifestyle behaviours, education and counselling in self-management, follow-up                                                                                                                                                                                                                                                                             | Health workers                       | Nurse                                                                       | No  |
| <b>S. Calugi, 2016</b>            | Primary health care     | Community                      | Caregivers' education and training, education and counselling in self-management, education and counselling on healthy lifestyle behaviours, therapeutic exercise                                                                                                                                                                                                                                                                                                                       | Health workers                       | Other physicians, physical therapist                                        | No  |
| <b>B. M. Buurman, 2016</b>        | Multiple levels of care | Inpatient, outpatient          | Comprehensive geriatric assessment, assessment of environment, discharge planning, assessment of person-centred goals and priorities for health care                                                                                                                                                                                                                                                                                                                                    | Health workers                       | Nurse                                                                       | No  |
| <b>J. Blom, 2016</b>              | Multiple levels of care | Outpatient                     | Assessment of person-centred goals and priorities for health care, case management, assessment of cognitive functions, comprehensive assessment of functioning, follow-up, multicomponent rehabilitation programme                                                                                                                                                                                                                                                                      | Health workers                       | General practitioner, nurse                                                 | No  |
| <b>N. Bleijenberg, 2016</b>       | Primary health care     | Outpatient                     | Assessment of frailty, assessment of polypharmacy, comprehensive geriatric assessment, functioning monitoring, case management, follow-up, multicomponent rehabilitation programme, management of urinary incontinence                                                                                                                                                                                                                                                                  | Health workers                       | General practitioner, nurse                                                 | No  |
| <b>S. Knecht, 2016</b>            | Specialized health care | Inpatient                      | Speech and language therapy, physical therapy, occupational therapy, sports-therapy, cognitive training, assessment of person-centred goals and priorities for health care, comprehensive assessment of functioning                                                                                                                                                                                                                                                                     | Health workers                       | Occupational therapist, nurse, speech and language therapists, psychologist | Yes |
| <b>P. De Vriendt, 2016</b>        | Primary health care     | Community                      | Assessment of person-centred goals and priorities for health care, activities of daily living skills training, provision and training in the use of assistive products, caregivers' education and training                                                                                                                                                                                                                                                                              | Health workers                       | Occupational therapist                                                      | No  |
| <b>R. S. Rasmussen, 2016</b>      | Multiple levels of care | Inpatient, home                | Assessment of person-centred goals and priorities for health care, comprehensive assessment of functioning, activities of daily living skills training, multicomponent rehabilitation programme, assessment of cognitive functions, environmental modifications, assessment of environment, provision and training in the use of assistive products, social care and support plan, caregivers' education and training, discharge planning, rehabilitation coordination and management   | Health workers                       | Physical therapist, occupational therapist, other physicians, nurse         | Yes |
| <b>G. Lewin, 2016</b>             | Primary health care     | Home                           | Comprehensive assessment of functioning, therapeutic exercise, education and counselling in self-management, assessment of person-centred goals and priorities for health care, activities of daily living skills training, provision and training in the use of assistive products, multicomponent rehabilitation programme, rehabilitation coordination and management, pharmacological therapy, education and counselling on nutrition, management of urinary and bowel incontinence | Informal caregivers and family       | –                                                                           | No  |
| <b>A. M. Meyer, 2016</b>          | Specialized health care | Telerehabilitation, outpatient | Assessment of cognitive functions, language therapy                                                                                                                                                                                                                                                                                                                                                                                                                                     | The patient                          | –                                                                           | –   |

|                                   |                         |                                |                                                                                                                                                                                                                                                                                                                                                           |                                                |                                                                                        |     |
|-----------------------------------|-------------------------|--------------------------------|-----------------------------------------------------------------------------------------------------------------------------------------------------------------------------------------------------------------------------------------------------------------------------------------------------------------------------------------------------------|------------------------------------------------|----------------------------------------------------------------------------------------|-----|
| <b>A. Y. Zhang, 2015</b>          | Specialized health care | Telerehabilitation, outpatient | Peer support or peer support group, therapeutic exercise, follow-up, education and counselling in self-management                                                                                                                                                                                                                                         | Health workers, peers and volunteers           | Nurse, psychologist                                                                    | No  |
| <b>F. K. Y. Wong, 2015</b>        | Multiple levels of care | Inpatient, outpatient          | Therapeutic exercise, discharge planning, follow-up, case management, comprehensive assessment of functioning, multicomponent rehabilitation programme, assessment of environment, caregivers' education and training, behavioural interventions, education and counselling on healthy lifestyle behaviours, education and counselling in self-management | Health workers                                 | Nurse                                                                                  | No  |
| <b>A. van Dijk-de Vries, 2015</b> | Primary health care     | Outpatient                     | Assessment of person-centred goals and priorities for health care, comprehensive assessment of functioning, assessment of emotional functions, emotional support, education and counselling in self-management, problem solving skills training                                                                                                           | Health workers, the patient                    | Nurse                                                                                  | No  |
| <b>S. van der Weegen, 2015</b>    | Primary health care     | Telerehabilitation             | Education and counselling in self-management, motivational activities, education and counselling on physical activity or exercise, functioning monitoring, assessment of person-centred goals and priorities for health care                                                                                                                              | Health workers                                 | Nurse                                                                                  | No  |
| <b>H. P. A. van der Aa, 2015</b>  | Specialized health care | Outpatient                     | Low vision rehabilitation, assessment of emotional functions, problem solving skills training, psychological interventions                                                                                                                                                                                                                                | Health workers                                 | Occupational therapist, social workers, psychologist                                   | Yes |
| <b>H. Umopathy, 2015</b>          | Specialized health care | Telerehabilitation             | Assessment of emotional functions, assessment of health status, comprehensive assessment of functioning, education and counselling in self-management, education and counselling on healthy lifestyle behaviours, health status monitoring, functioning monitoring                                                                                        | The patient                                    | –                                                                                      | –   |
| <b>A. E. Scharlach, 2015</b>      | Primary health care     | Home                           | Comprehensive assessment of functioning, case management, assessment of environment, assistance in activities of daily living                                                                                                                                                                                                                             | Peers and volunteers                           | –                                                                                      | No  |
| <b>A. C. Pighills, 2015</b>       | Primary health care     | Community                      | Comprehensive assessment of functioning, rehabilitation coordination and management, multicomponent rehabilitation programme                                                                                                                                                                                                                              | Health workers                                 | Physical therapist, occupational therapist, other physicians                           | Yes |
| <b>J. D. Piette, 2015</b>         | Multiple levels of care | Telerehabilitation             | Education and counselling in self-management, caregivers' education and training, functioning monitoring                                                                                                                                                                                                                                                  | Health workers, informal caregivers and family | Other physicians, nurse                                                                | No  |
| <b>R. Pérez-Cuevas, 2015</b>      | Specialized health care | Outpatient                     | Rehabilitation coordination and management, comprehensive geriatric assessment, physical therapy, occupational therapy, psychological interventions, social skills training, education and counselling in self-management                                                                                                                                 | Health workers                                 | Geriatrician, psychologist, social workers, occupational therapist, physical therapist | Yes |
| <b>S. M. Mosleh, 2015</b>         | Primary health care     | Outpatient                     | Therapeutic exercise, education and counselling in self-management                                                                                                                                                                                                                                                                                        | Health workers                                 | Physical therapist, nurse, psychologist, dieticians                                    | Yes |
| <b>R. J. Mays, 2015</b>           | Primary health care     | Community                      | Therapeutic exercise, education and counselling in self-management, assessment of environment, functioning monitoring                                                                                                                                                                                                                                     | –                                              | –                                                                                      | –   |
| <b>R. Maddison, 2015</b>          | Specialized health care | Telerehabilitation             | Therapeutic exercise, education and counselling in self-management, functioning monitoring, behavioural interventions                                                                                                                                                                                                                                     | The patient                                    | –                                                                                      | –   |
| <b>P. Lou, 2015</b>               | Primary health care     | Community                      | Rehabilitation coordination and management, comprehensive assessment of functioning, follow-up, education and counselling in self-management, education and counselling on healthy lifestyle behaviours                                                                                                                                                   | Health workers                                 | General practitioner, nurse, PRM physicians, dieticians                                | Yes |
| <b>S. A. Lear, 2015</b>           | Specialized health care | Telerehabilitation             | Therapeutic exercise, health status monitoring, education and counselling in self-management, education and counselling on nutrition                                                                                                                                                                                                                      | Health workers                                 | Nurse, dieticians                                                                      | Yes |
| <b>D. S. Kushner, 2015</b>        | Specialized health care | Inpatient                      | Rehabilitation coordination and management, case management, discharge planning, assessment of person-centred goals and priorities for health care,                                                                                                                                                                                                       | Health workers                                 | Other physicians, physical therapist, speech and                                       | Yes |

|                                                 |                         |                                |                                                                                                                                                                                                                                                                                                                                                                                                                                                        |                             |                                                               |     |
|-------------------------------------------------|-------------------------|--------------------------------|--------------------------------------------------------------------------------------------------------------------------------------------------------------------------------------------------------------------------------------------------------------------------------------------------------------------------------------------------------------------------------------------------------------------------------------------------------|-----------------------------|---------------------------------------------------------------|-----|
|                                                 |                         |                                | comprehensive assessment of functioning, multicomponent rehabilitation programme                                                                                                                                                                                                                                                                                                                                                                       |                             | language therapists, occupational therapist, nurse            |     |
| <b>L. Kidd, 2015</b>                            | Primary health care     | Outpatient                     | Motivational activities, assessment of person-centred goals and priorities for health care, education and counselling in self-management                                                                                                                                                                                                                                                                                                               | Health workers, the patient | Nurse                                                         | No  |
| <b>J. Garvey, 2015</b>                          | Primary health care     | Community                      | Education and counselling in self-management, assessment of person-centred goals and priorities for health care, education and counselling on healthy lifestyle behaviours, peer support or peer support group                                                                                                                                                                                                                                         | Health workers, the patient | Occupational therapist                                        | No  |
| <b>A. Forster, 2015</b>                         | Primary health care     | Community                      | Comprehensive assessment of functioning, multicomponent rehabilitation programme                                                                                                                                                                                                                                                                                                                                                                       | Health workers              | –                                                             | –   |
| <b>M. P. Foley, 2015</b>                        | Primary health care     | Community                      | Therapeutic exercise, comprehensive assessment of functioning, assessment of person-centred goals and priorities for health care                                                                                                                                                                                                                                                                                                                       | Health workers              | Physical therapist                                            | No  |
| <b>C. Ekelund, 2015</b>                         | Multiple levels of care | Inpatient, outpatient          | Assessment of person-centred goals and priorities for health care, multicomponent rehabilitation programme, rehabilitation coordination and management, assessment of frailty, comprehensive geriatric assessment, follow-up, discharge planning                                                                                                                                                                                                       | Health workers              | Occupational therapist, PRM physicians, nurse, social workers | Yes |
| <b>J. Edgren, 2015</b>                          | Specialized health care | Home                           | Assessment of person-centred goals and priorities for health care, therapeutic exercise, education and counselling on physical activity or exercise, provision and training in the use of assistive products, education and counselling in self-management, environmental modifications, assessment of environment, activities of daily living skills training, functioning monitoring, follow-up, assessment of fall risk, assessment of polypharmacy | Health workers              | Physical therapist                                            | No  |
| <b>N. Cuperus, 2015</b>                         | Specialized health care | Telerehabilitation, outpatient | Comprehensive assessment of functioning, assessment of person-centred goals and priorities for health care, motivational activities, therapeutic exercise, activities of daily living skills training, multicomponent rehabilitation programme, education and counselling in self-management, education and counselling on physical activity or exercise, education and counselling on nutrition, functioning monitoring, follow-up                    | Health workers              | Physical therapist, occupational therapist, nurse, dieticians | Yes |
| <b>P. Coventry, 2015</b>                        | Multiple levels of care | Outpatient                     | Behavioural interventions, optimization of pharmacological therapy, psychological interventions, assessment of emotional functions, education and counselling in self-management, education and counselling on healthy lifestyle behaviours, rehabilitation coordination and management                                                                                                                                                                | Health workers              | Other physicians, nurse, psychologist                         | Yes |
| <b>R. A. Clark, 2015</b>                        | Primary health care     | Community                      | Education and counselling in self-management                                                                                                                                                                                                                                                                                                                                                                                                           | Health workers, the patient | –                                                             | –   |
| <b>A. K. Chang, 2015</b>                        | Specialized health care | Eldercare institution          | Social care and support plan, therapeutic recreation, caregivers' education and training, assistance in activities of daily living, assessment of person-centred goals and priorities for health care, therapeutic exercise, activities of daily living skills training                                                                                                                                                                                | Health workers              | Physical therapist, nurse                                     | No  |
| <b>D. B. Bekelman, 2015</b>                     | Multiple levels of care | Telerehabilitation             | Health status monitoring, functioning monitoring, assessment of emotional functions, rehabilitation coordination and management, education and counselling in self-management, psychological interventions                                                                                                                                                                                                                                             | Health workers              | General practitioner, nurse                                   | No  |
| <b>I. Frederix D. Hansen K. Coninx P., 2015</b> | Specialized health care | Telerehabilitation             | Education and counselling on healthy lifestyle behavioural interventions, psychological interventions, assessment of emotional functions, assessment of person-centred goals and priorities for health care, education and counselling on nutrition, follow-up, health status monitoring, assessment of health status                                                                                                                                  | Health workers              | Psychologist, dieticians                                      | No  |
| <b>S. McKenna, 2015</b>                         | Specialized health care | Community                      | Assessment of person-centred goals and priorities for health care, discharge planning, multicomponent rehabilitation programme, social care and support plan, behavioural interventions, education and counselling in self-management                                                                                                                                                                                                                  | The patient                 | –                                                             | No  |

|                                |                         |                             |                                                                                                                                                                                                                                                                                                                                |                             |                                                                                   |     |
|--------------------------------|-------------------------|-----------------------------|--------------------------------------------------------------------------------------------------------------------------------------------------------------------------------------------------------------------------------------------------------------------------------------------------------------------------------|-----------------------------|-----------------------------------------------------------------------------------|-----|
| <b>J. D. , 2015</b>            | Multiple levels of care | Inpatient                   | Caregivers' education and training                                                                                                                                                                                                                                                                                             | Health workers              | Physical therapist                                                                | No  |
| <b>E. Piotrowicz, 2015</b>     | Specialized health care | Telerehabilitation          | Psychological interventions, assessment of person-centred goals and priorities for health care, therapeutic exercise, health status monitoring                                                                                                                                                                                 | Health workers              | Physical therapist, nurse, psychologist                                           | Yes |
| <b>H. Tunt, 2015</b>           | Specialized health care | Outpatient                  | Comprehensive assessment of functioning, assessment of person-centred goals and priorities for health care, activities of daily living skills training, environmental modifications, assessment of environment, therapeutic exercise, rehabilitation coordination and management, education and counselling in self-management | Health workers              | Speech and language therapists, physical therapist, occupational therapist, nurse | Yes |
| <b>N. S. Tielemans, 2015</b>   | Specialized health care | Outpatient                  | Psychological interventions, education and counselling in self-management                                                                                                                                                                                                                                                      | Health workers, the patient | Psychologist, occupational therapist                                              | No  |
| <b>A. Winkel, 2015</b>         | Primary health care     | Home                        | Case management, follow-up, assessment of person-centred goals and priorities for health care, activities of daily living skills training, assessment of environment, environmental modifications, caregivers' education and training                                                                                          | Health workers              | Occupational therapist                                                            | No  |
| <b>T. Taule L. I. St, 2015</b> | Multiple levels of care | Inpatient, outpatient, home | Case management, discharge planning, physical therapy, occupational therapy, multicomponent rehabilitation programme, assessment of person-centred goals and priorities for health care, therapeutic exercise, activities of daily living skills training, cognitive training                                                  | Health workers              | Physical therapist, occupational therapist                                        | No  |
| <b>D. N. Kiosses, 2015</b>     | Specialized health care | Home                        | Psychological interventions, assessment of emotional functions, assessment of person-centred goals and priorities for health care, problem solving skills training, environmental modifications                                                                                                                                | Health workers              | Social workers, psychologist, other                                               | Yes |
| <b>S. F. Metzethin, 2015</b>   | Primary health care     | Home                        | Assessment of frailty, multicomponent rehabilitation programme, assessment of person-centred goals and priorities for health care, rehabilitation coordination and management                                                                                                                                                  | Health workers              | Physical therapist, occupational therapist, general practitioner, nurse           | Yes |
